# Supplementary material for: Pathogenic and Non-Pathogenic Microorganisms in the Rapid Alert System for Food and Feed
Source: PubMed Central journal article supplement (PMC6388125; doi:10.3390/ijerph16030477), 2019-02-06
Supplement: ijerph-16-00477-s001.pdf [file ijerph-16-00477-s001.pdf]

# Supplementary Materials: Pathogenic and non-pathogenic microorganisms in the Rapid Alert System for Food and Feed (pathogenic microorganisms)

Marcin Pięłowski

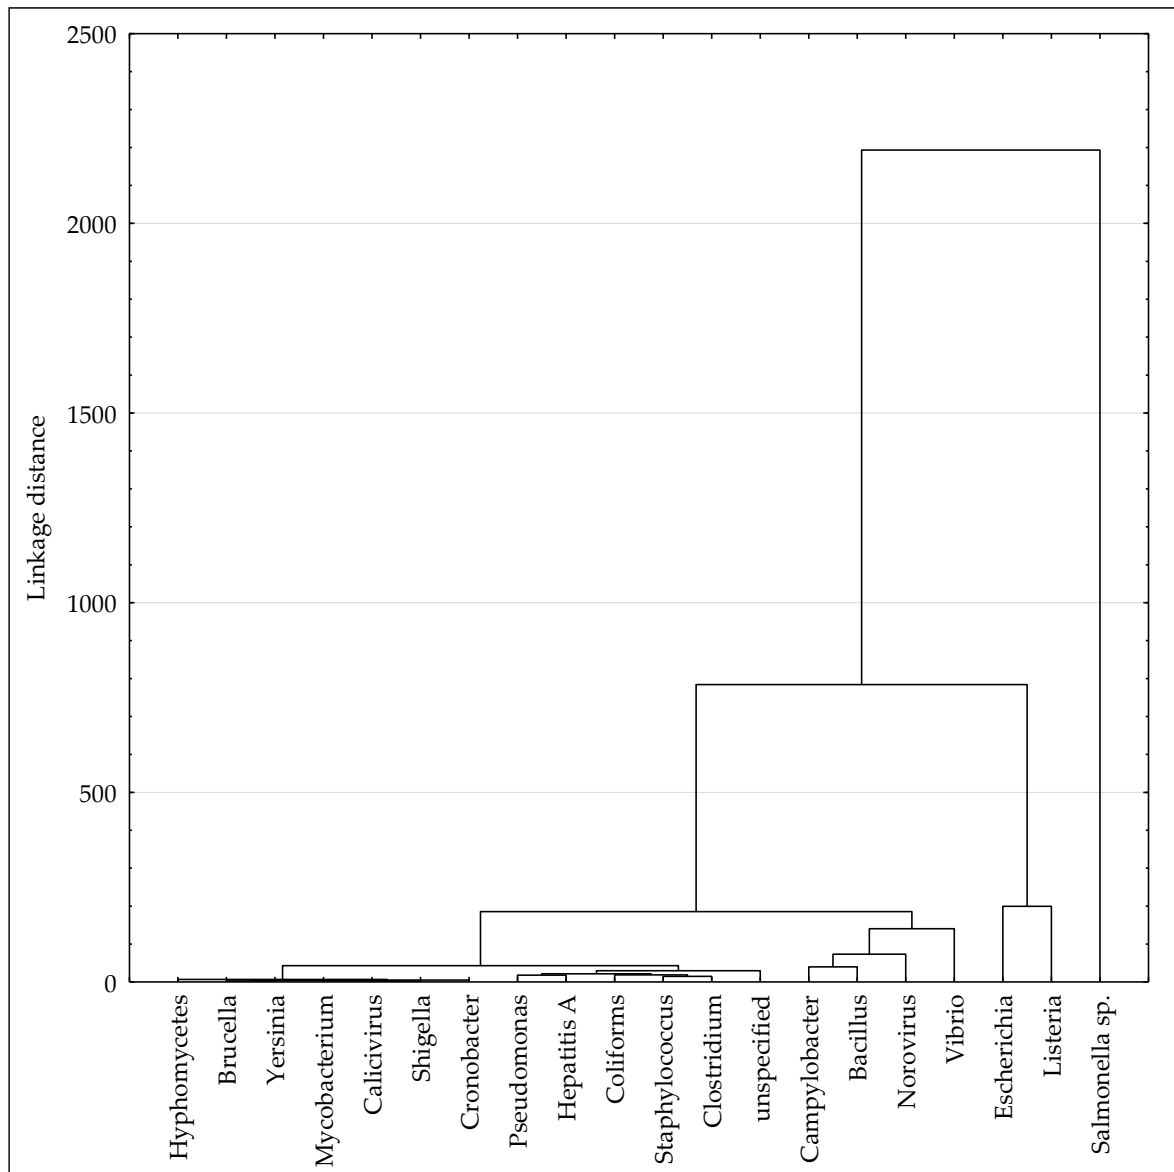

**Figure S1.** Similarities of RASFF notifications on pathogenic microorganisms and year within food using joining.

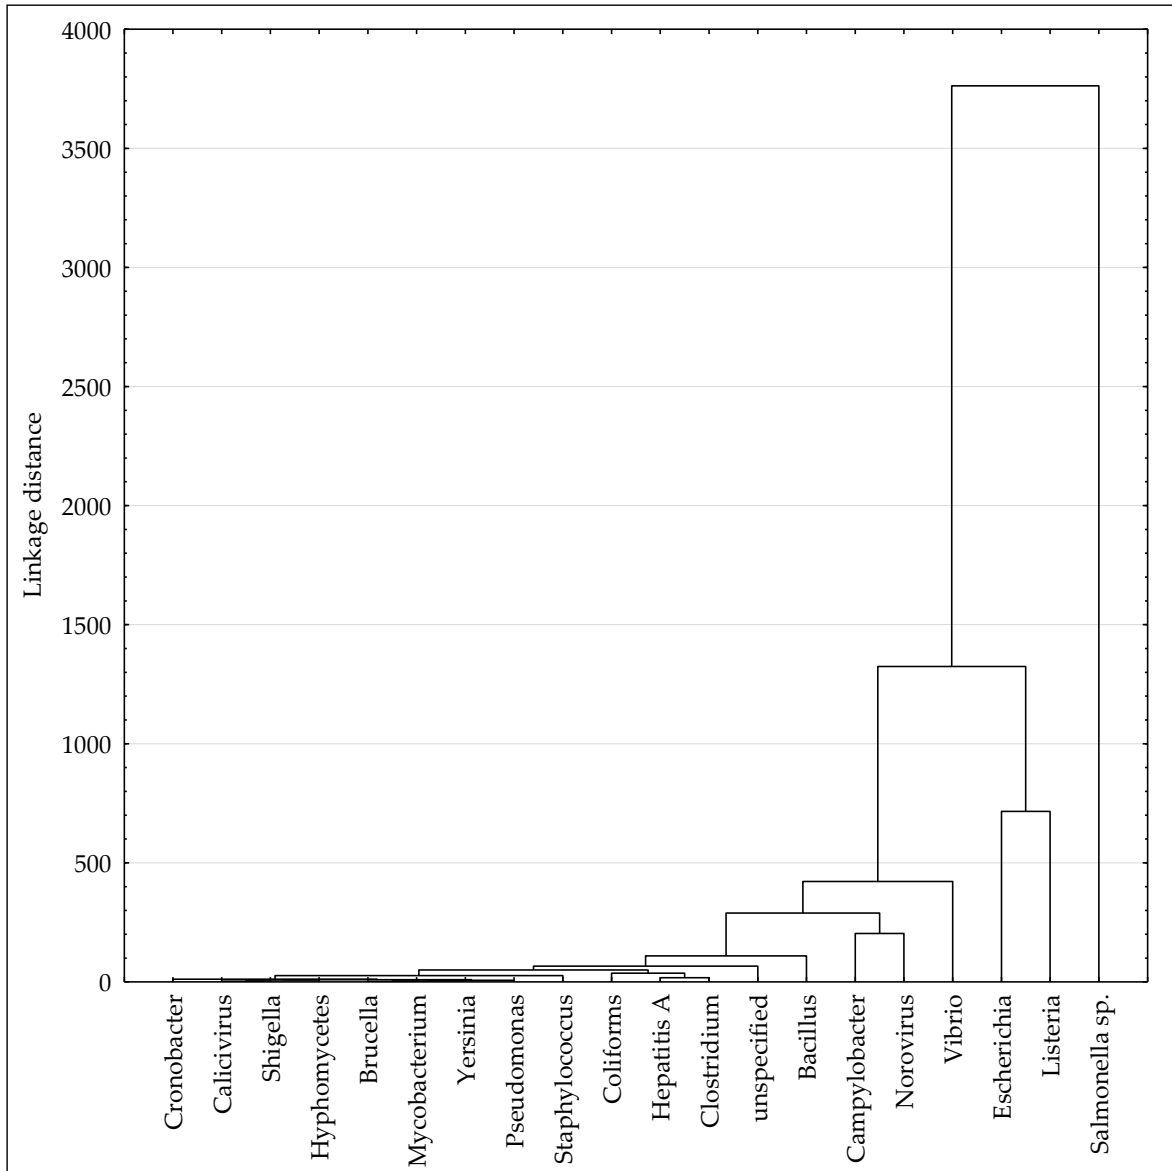

**Figure S2.** Similarities of RASFF notifications on pathogenic microorganisms and product category within food using joining.

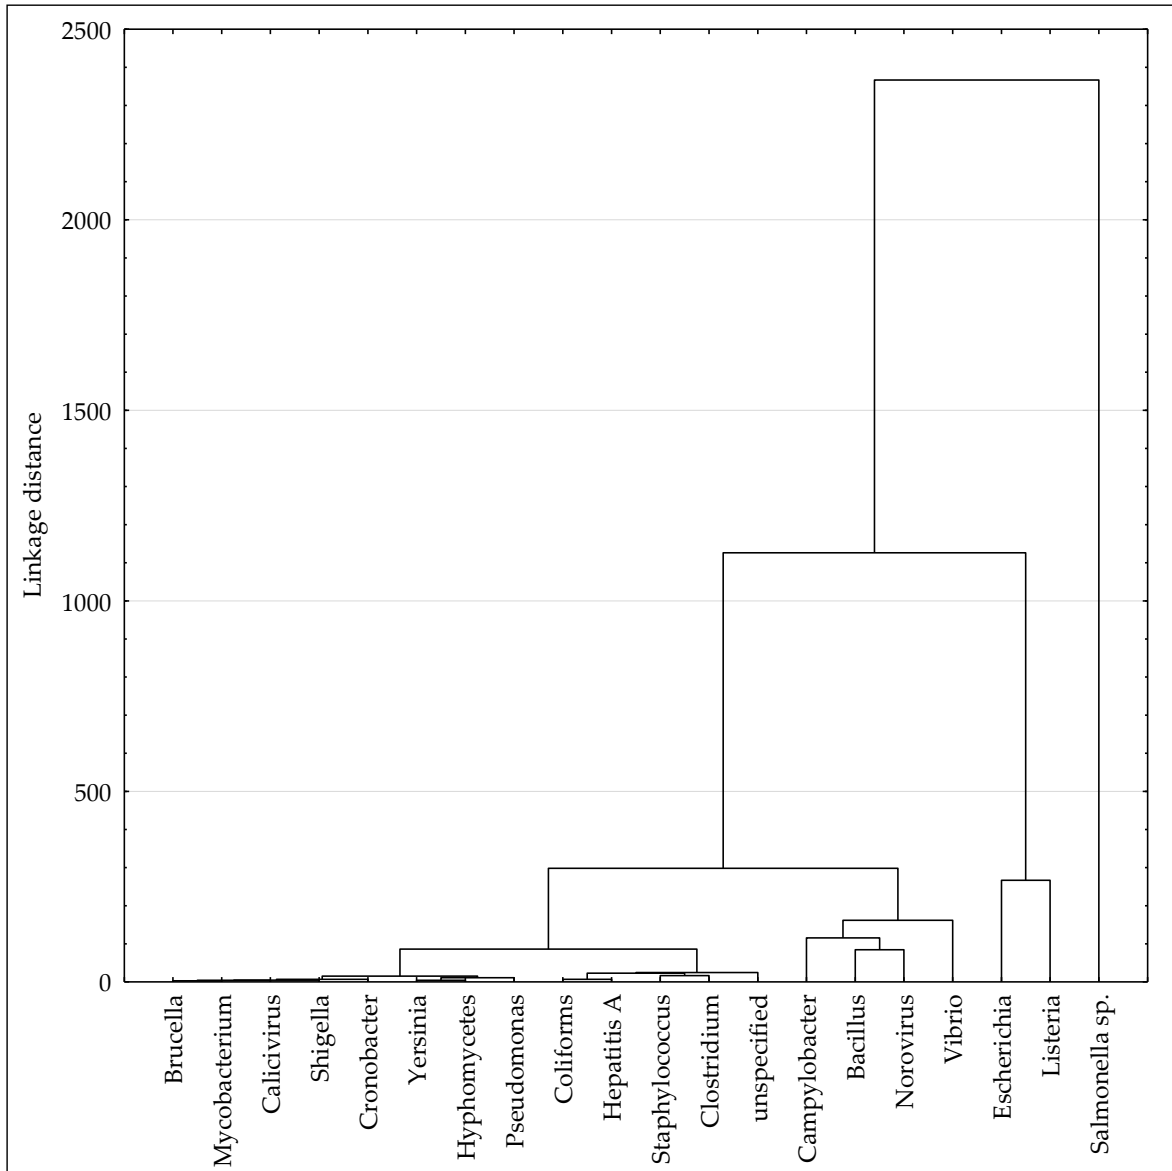

**Figure S3.** Similarities of RASFF notifications on pathogenic microorganisms and notifying country within food using joining.

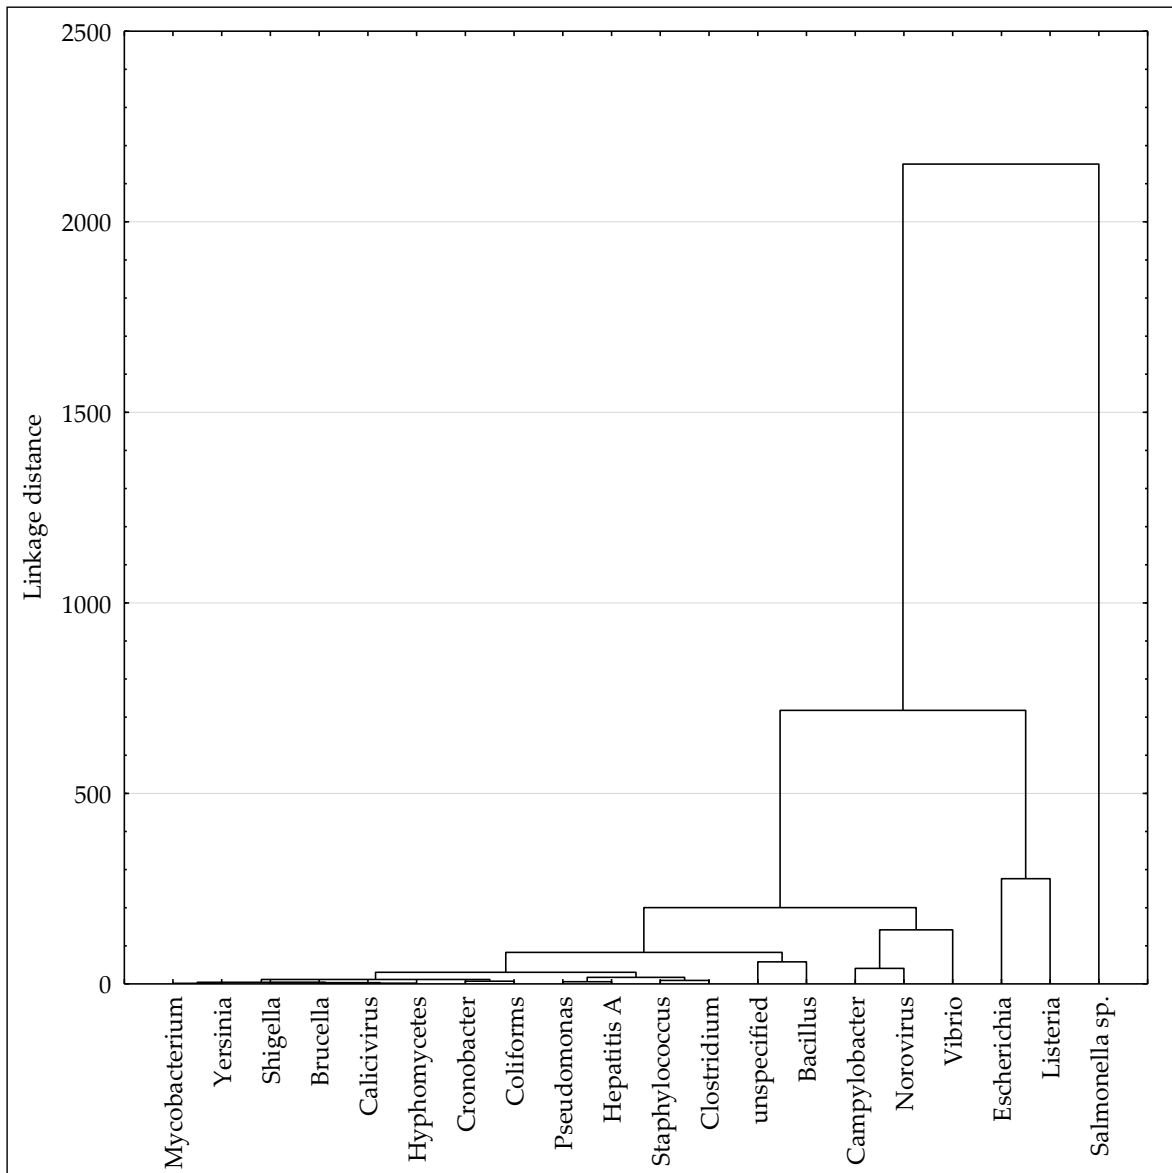

**Figure S4.** Similarities of RASFF notifications on pathogenic microorganisms and origin country within food using joining.

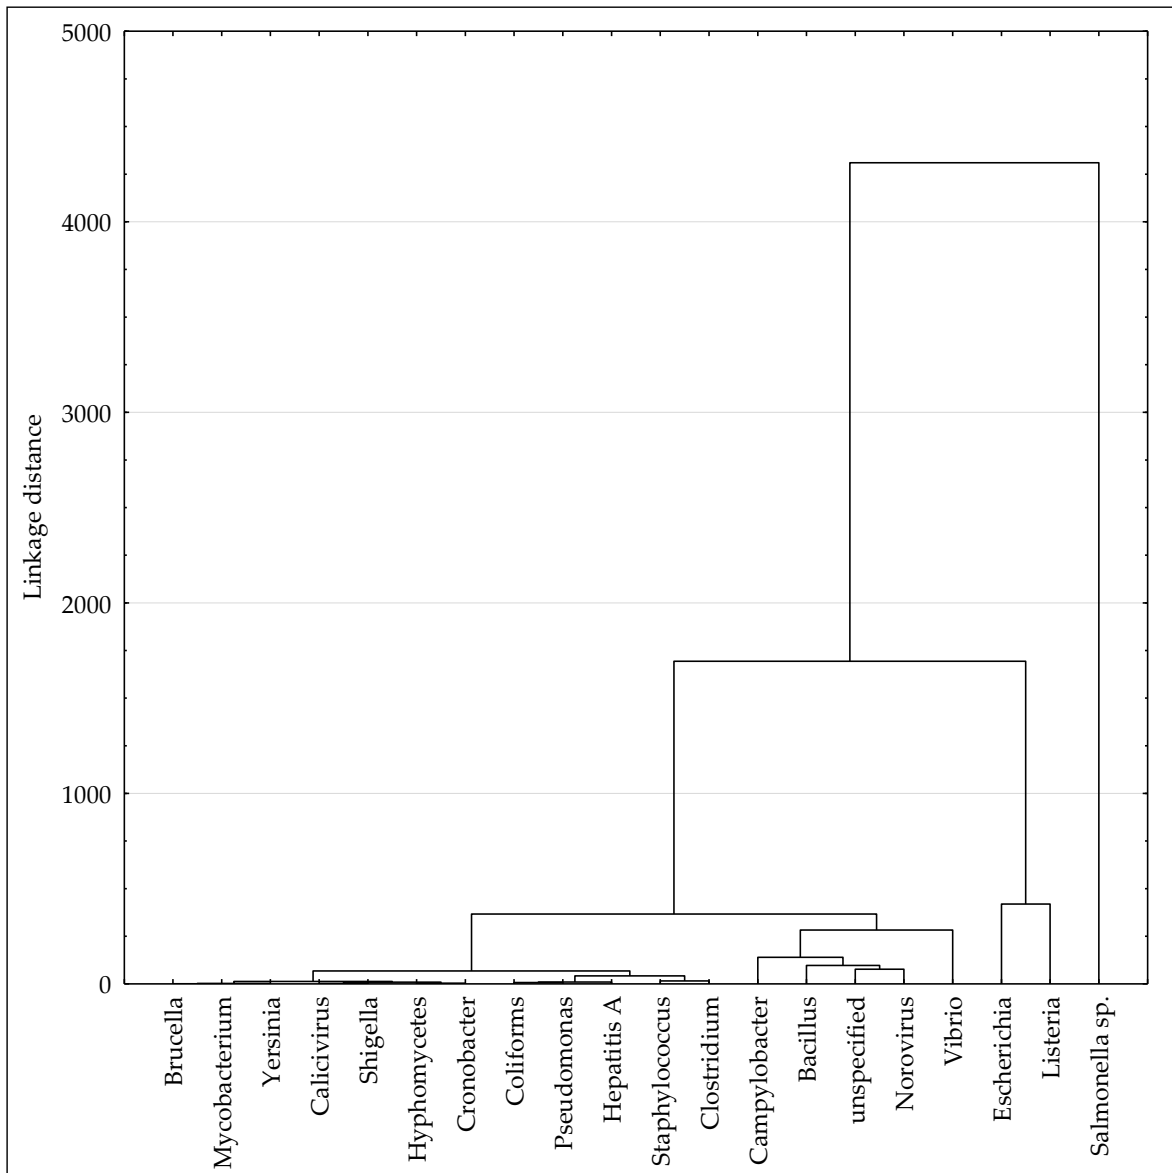

**Figure S5.** Similarities of RASFF notifications on pathogenic microorganisms and notification basis within food using joining.

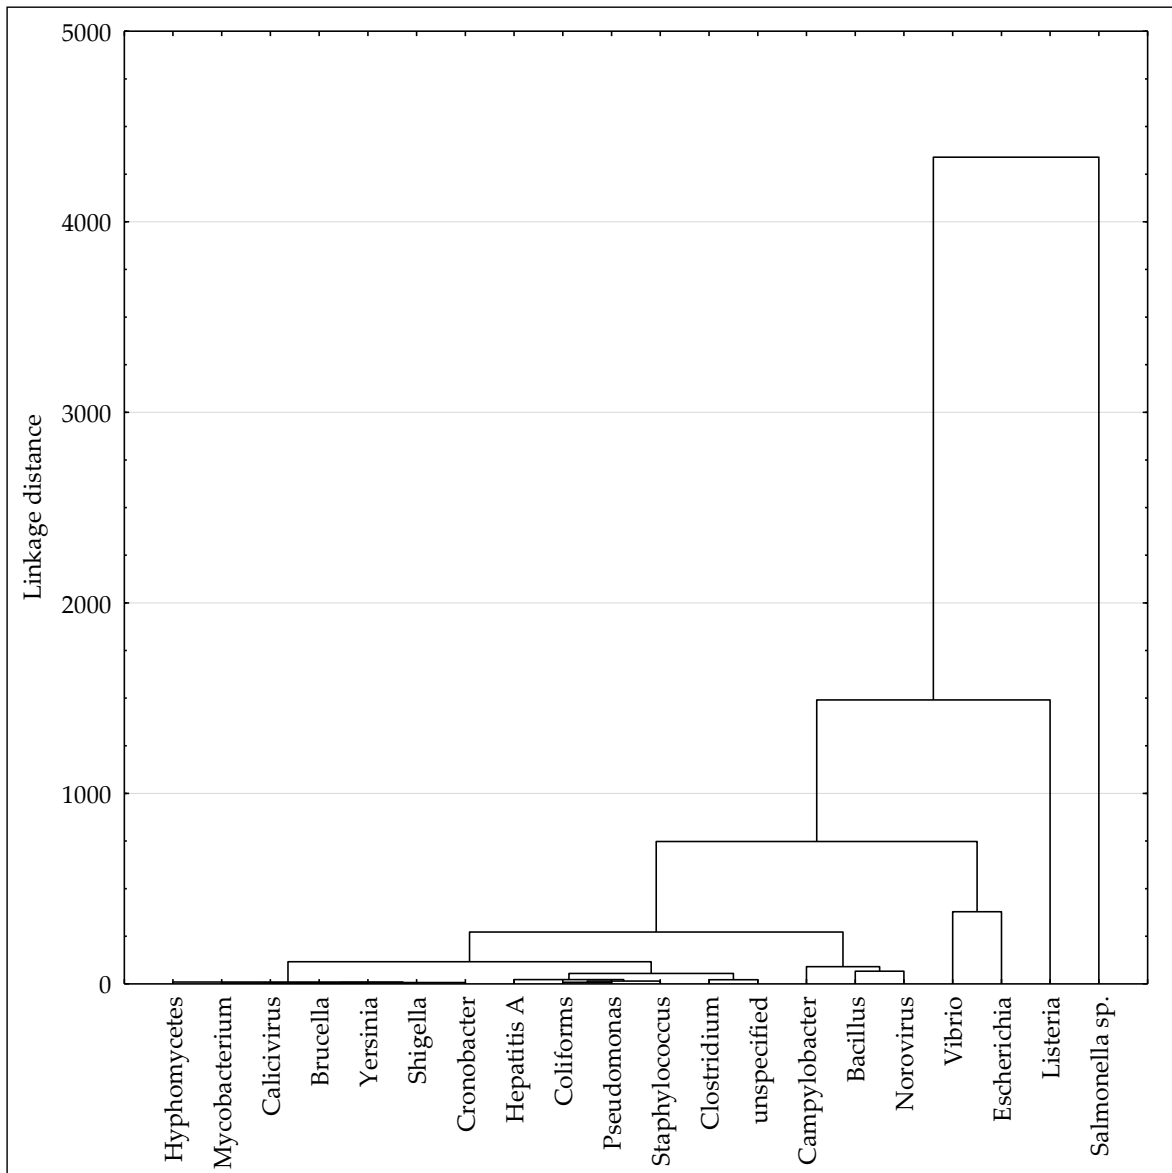

**Figure S6.** Similarities of RASFF notifications on pathogenic microorganisms and notification type within food using joining.

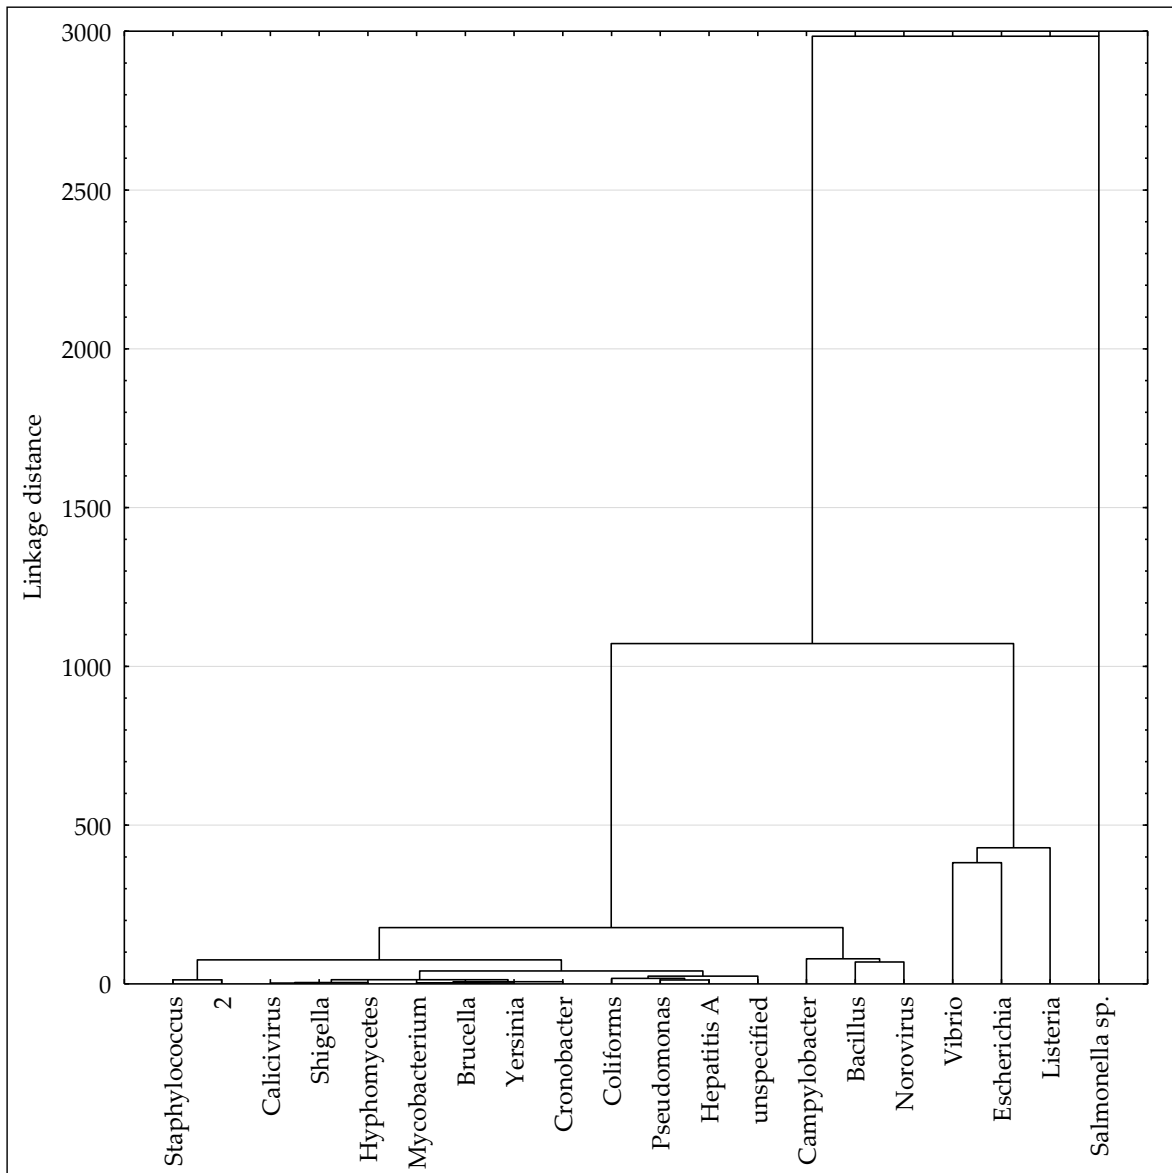

**Figure S7.** Similarities of RASFF notifications on pathogenic microorganisms and distribution status within food using joining.

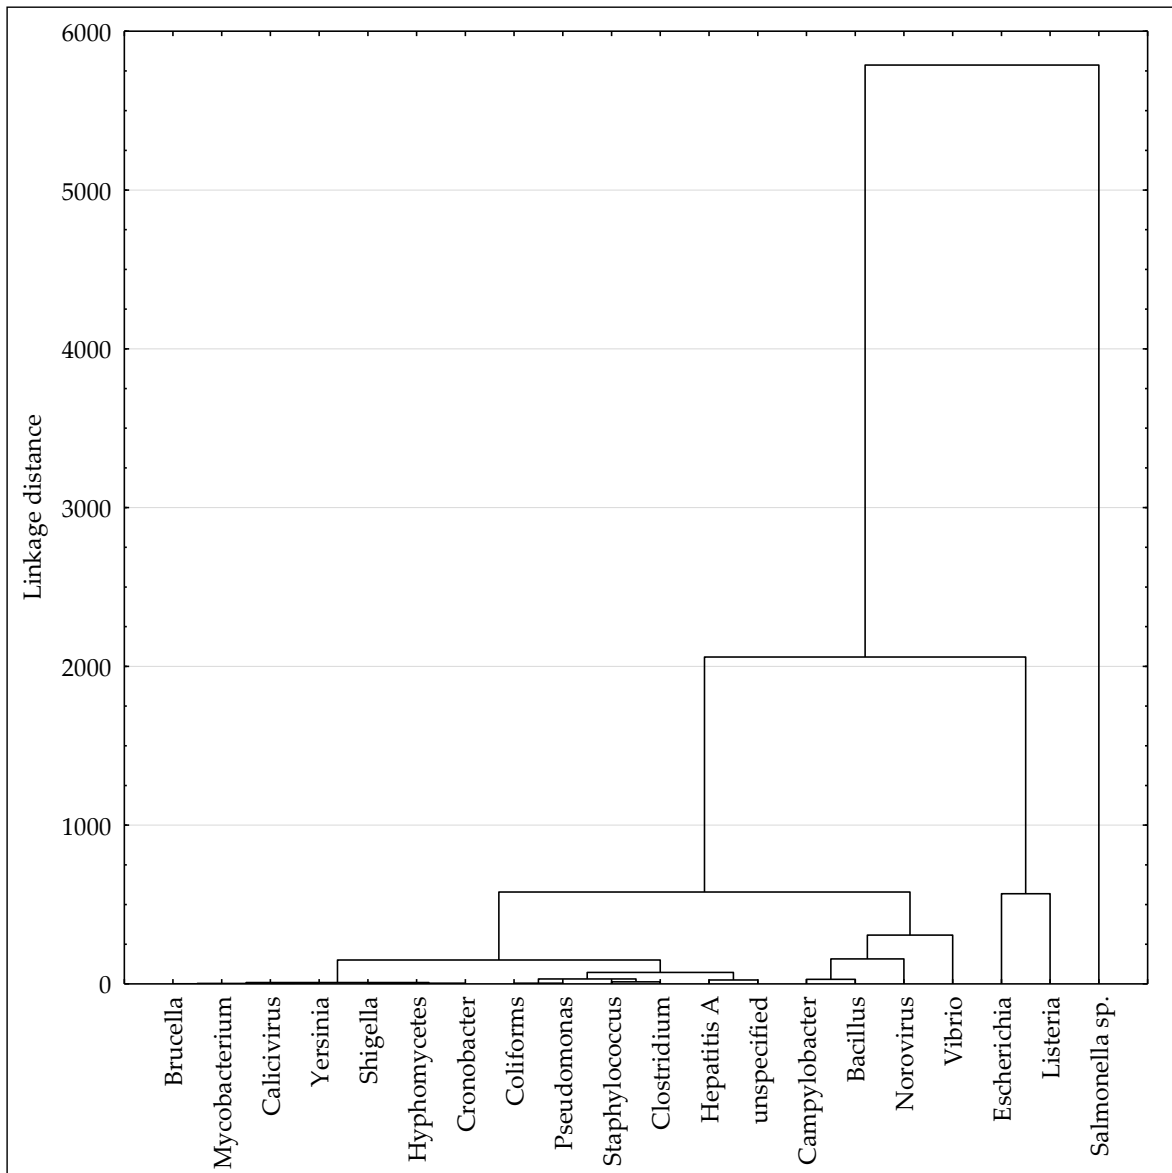

**Figure S8.** Similarities of RASFF notifications on pathogenic microorganisms and risk decision within food using joining.



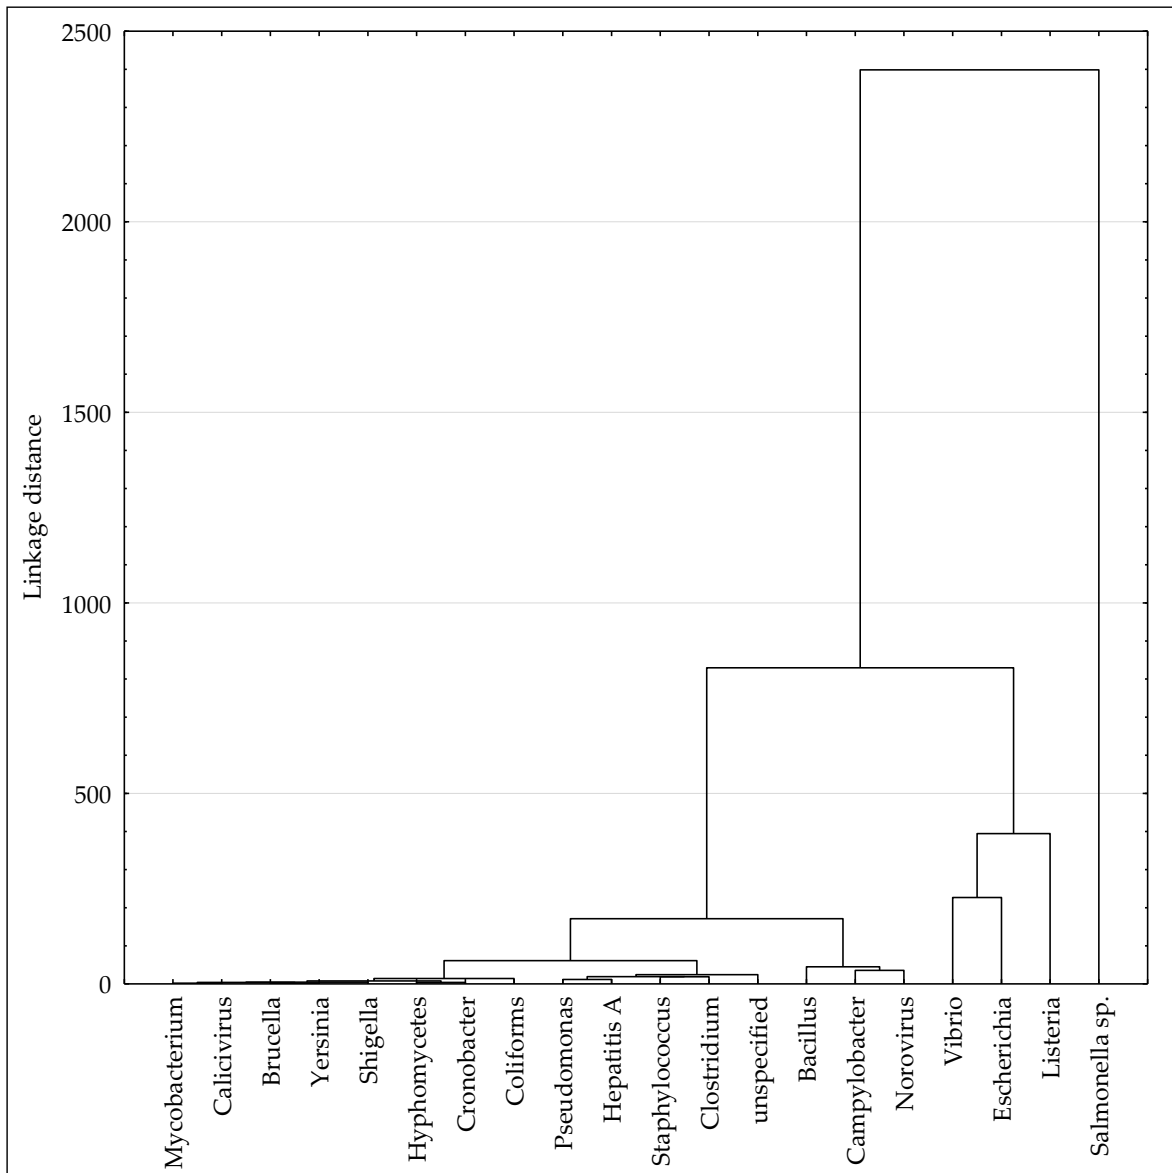

**Figure S9.** Similarities of RASFF notifications on pathogenic microorganisms and action taken within food using joining.

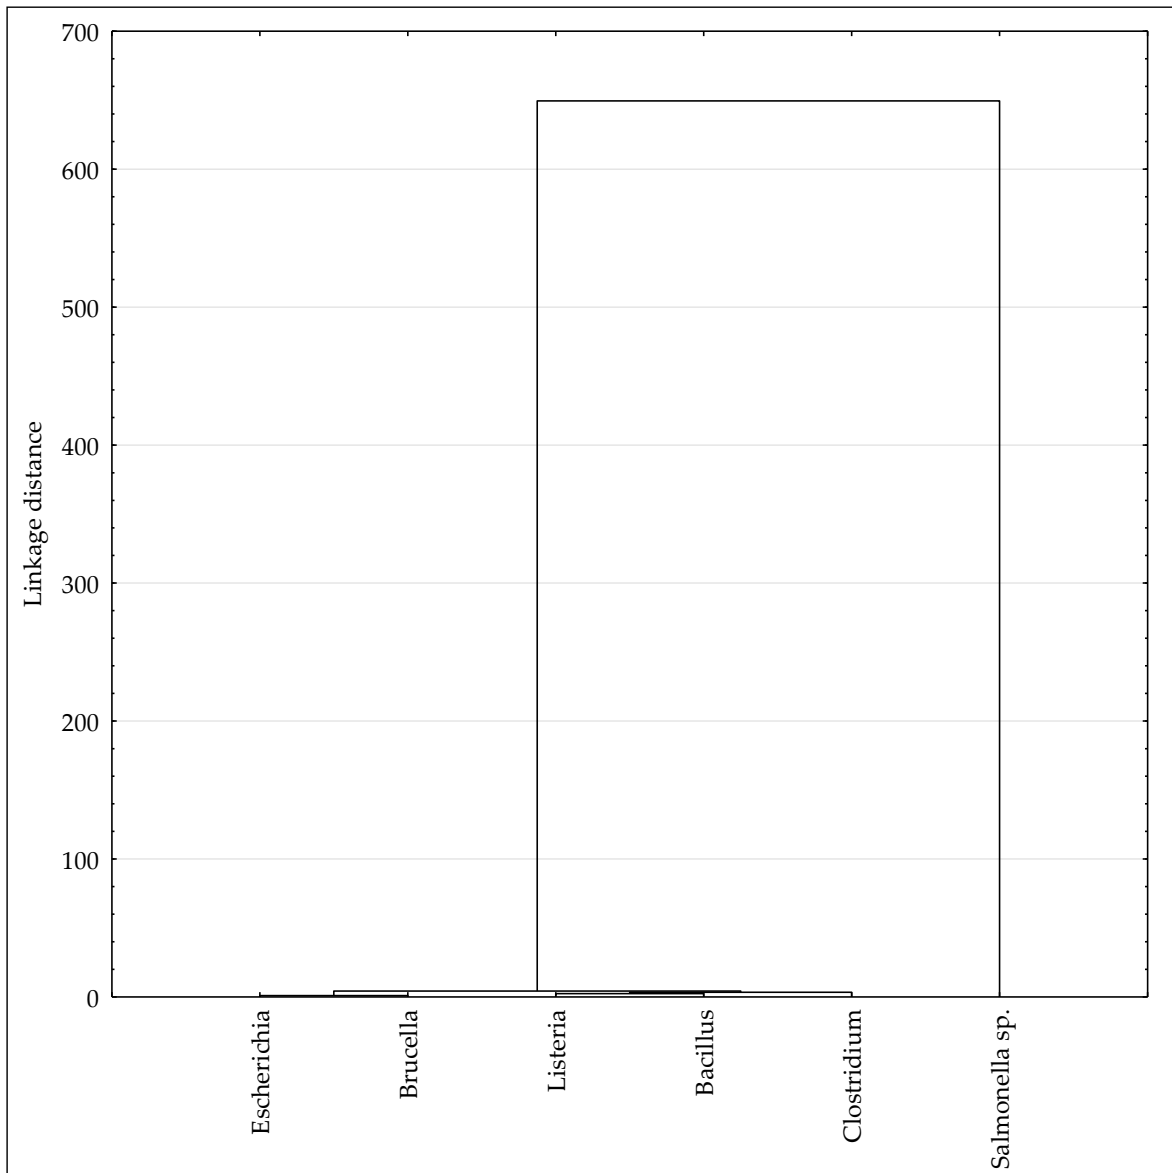

**Figure S10.** Similarities of RASFF notifications on pathogenic microorganisms and year within feed using joining.

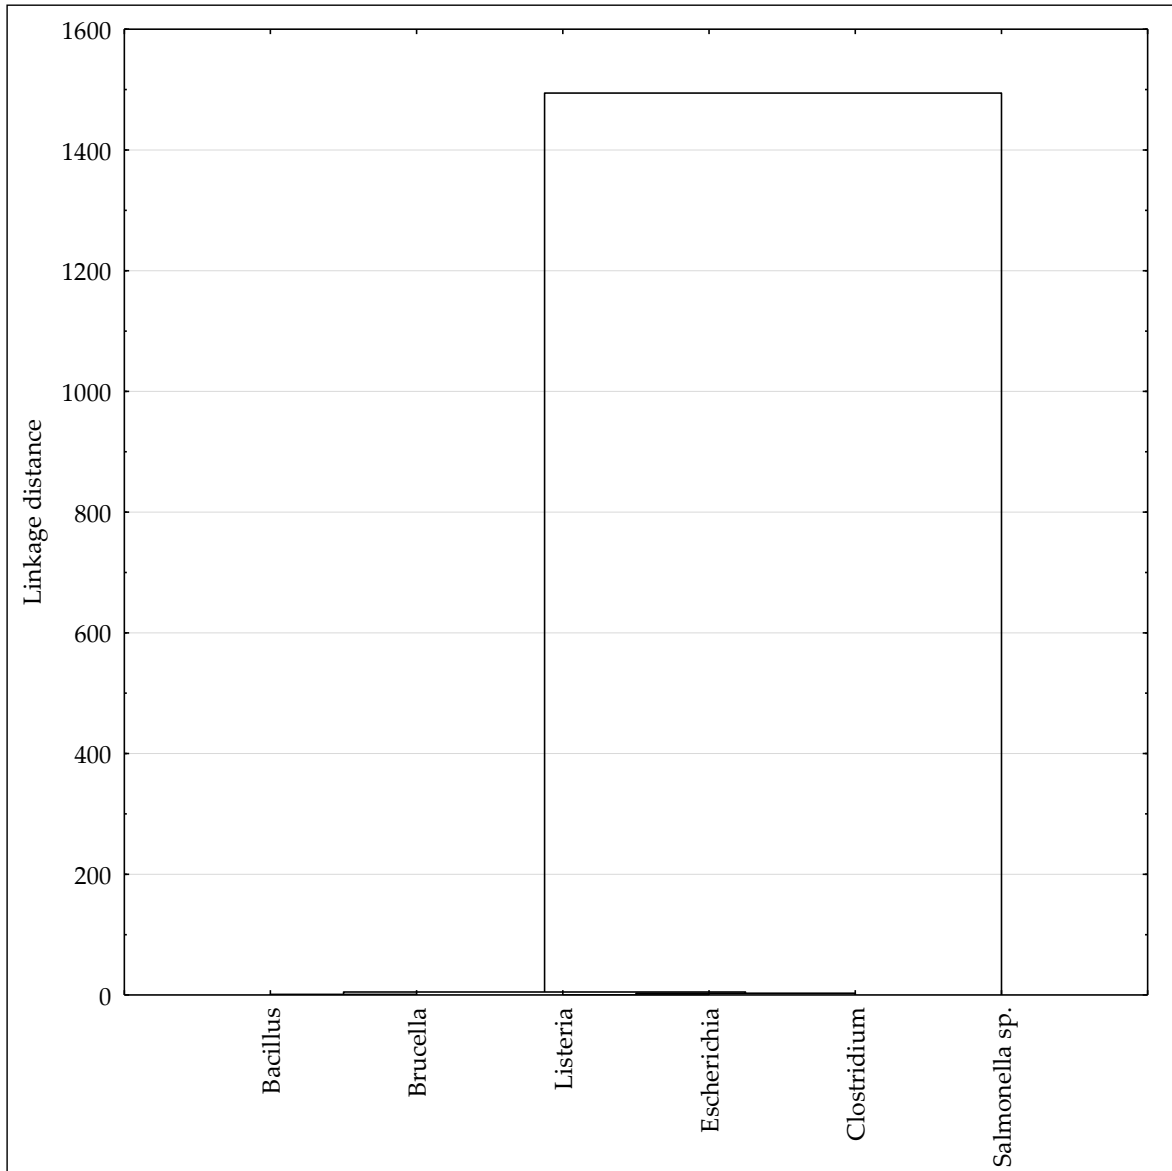

**Figure S11.** Similarities of RASFF notifications on pathogenic microorganisms and product category within feed using joining.

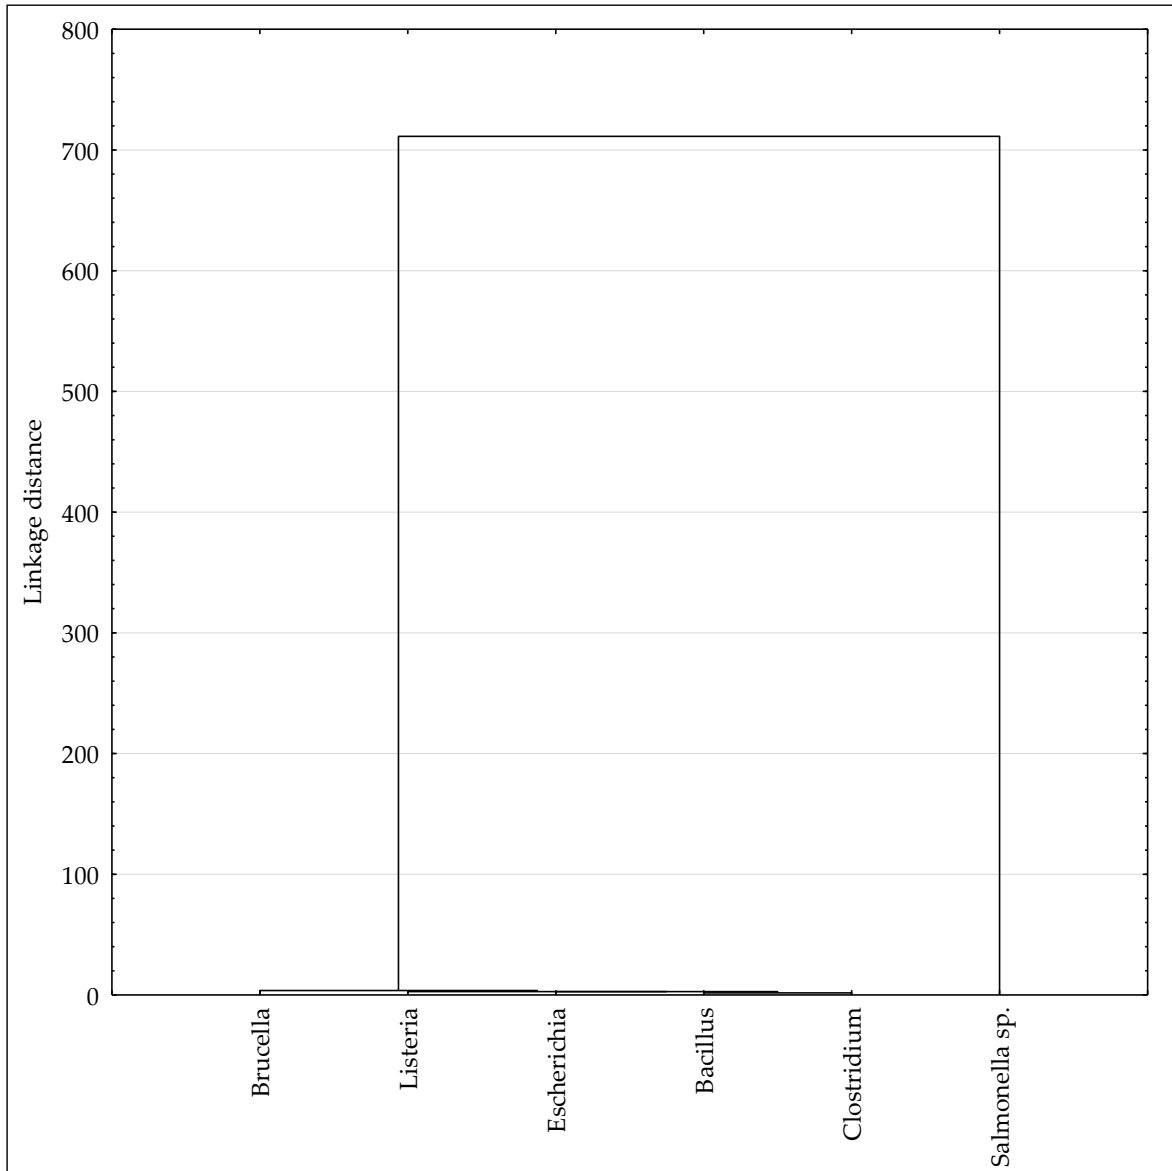

**Figure S12.** Similarities of RASFF notifications on pathogenic microorganisms and notifying country within feed using joining.

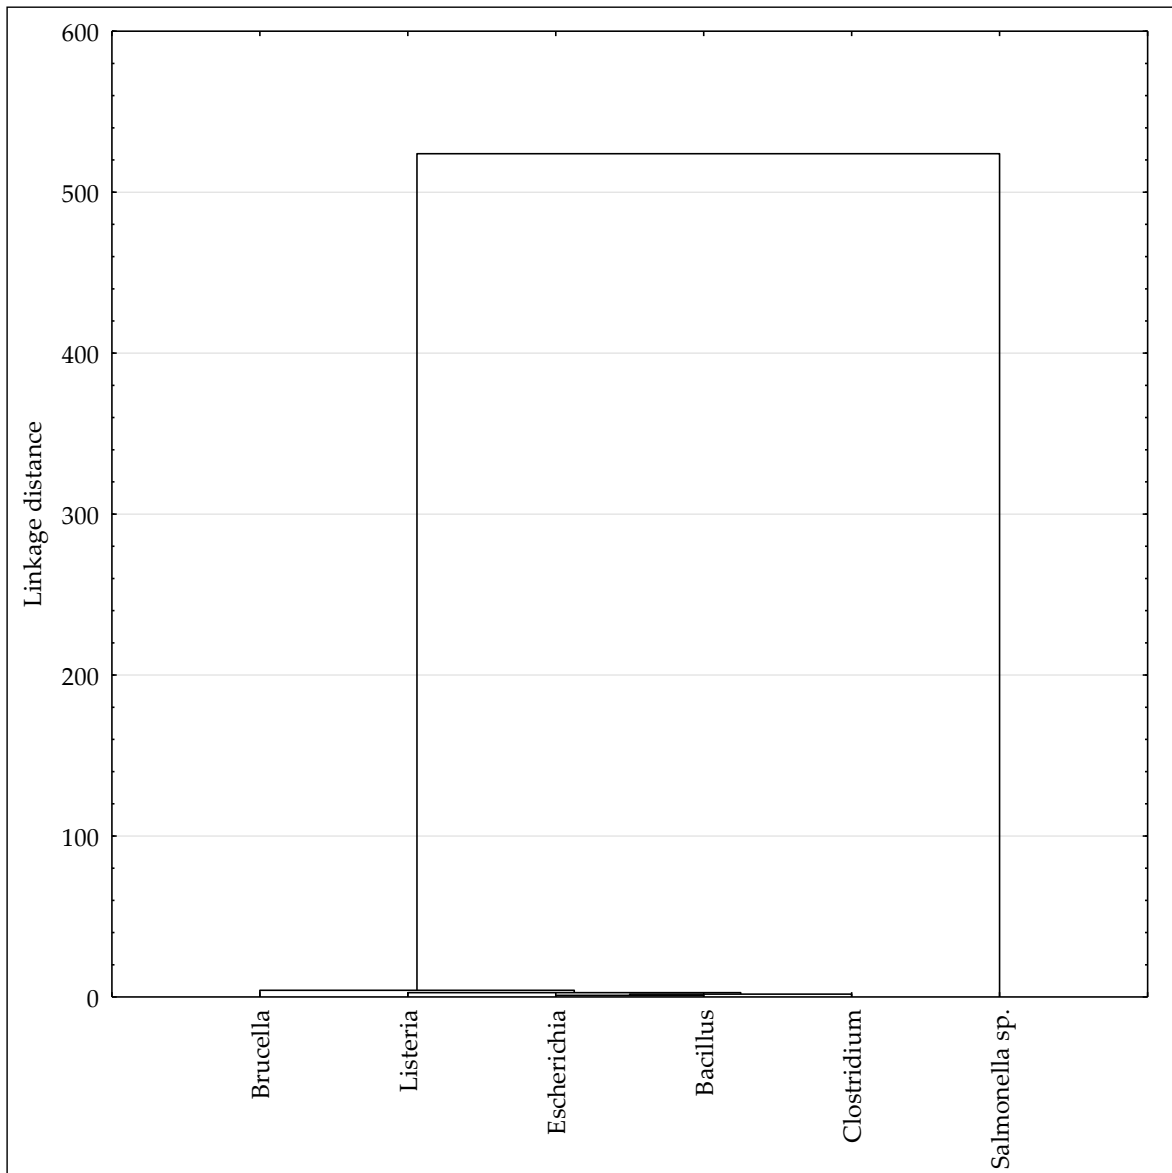

**Figure S13.** Similarities of RASFF notifications on pathogenic microorganisms and origin country within feed using joining.

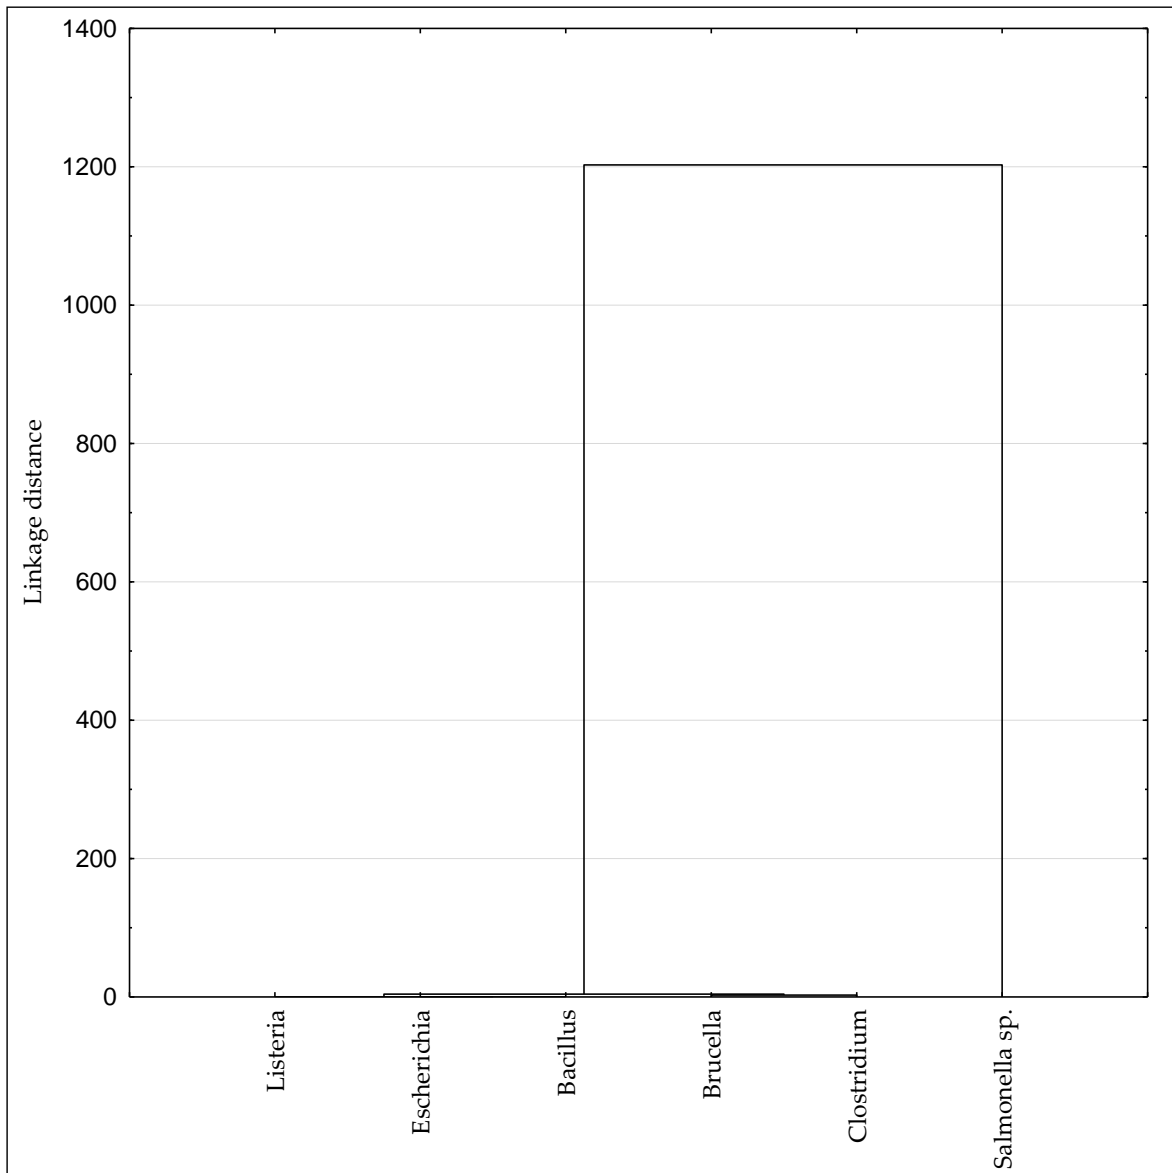

**Figure S14.** Similarities of RASFF notifications on pathogenic microorganisms and notification basis within feed using joining.

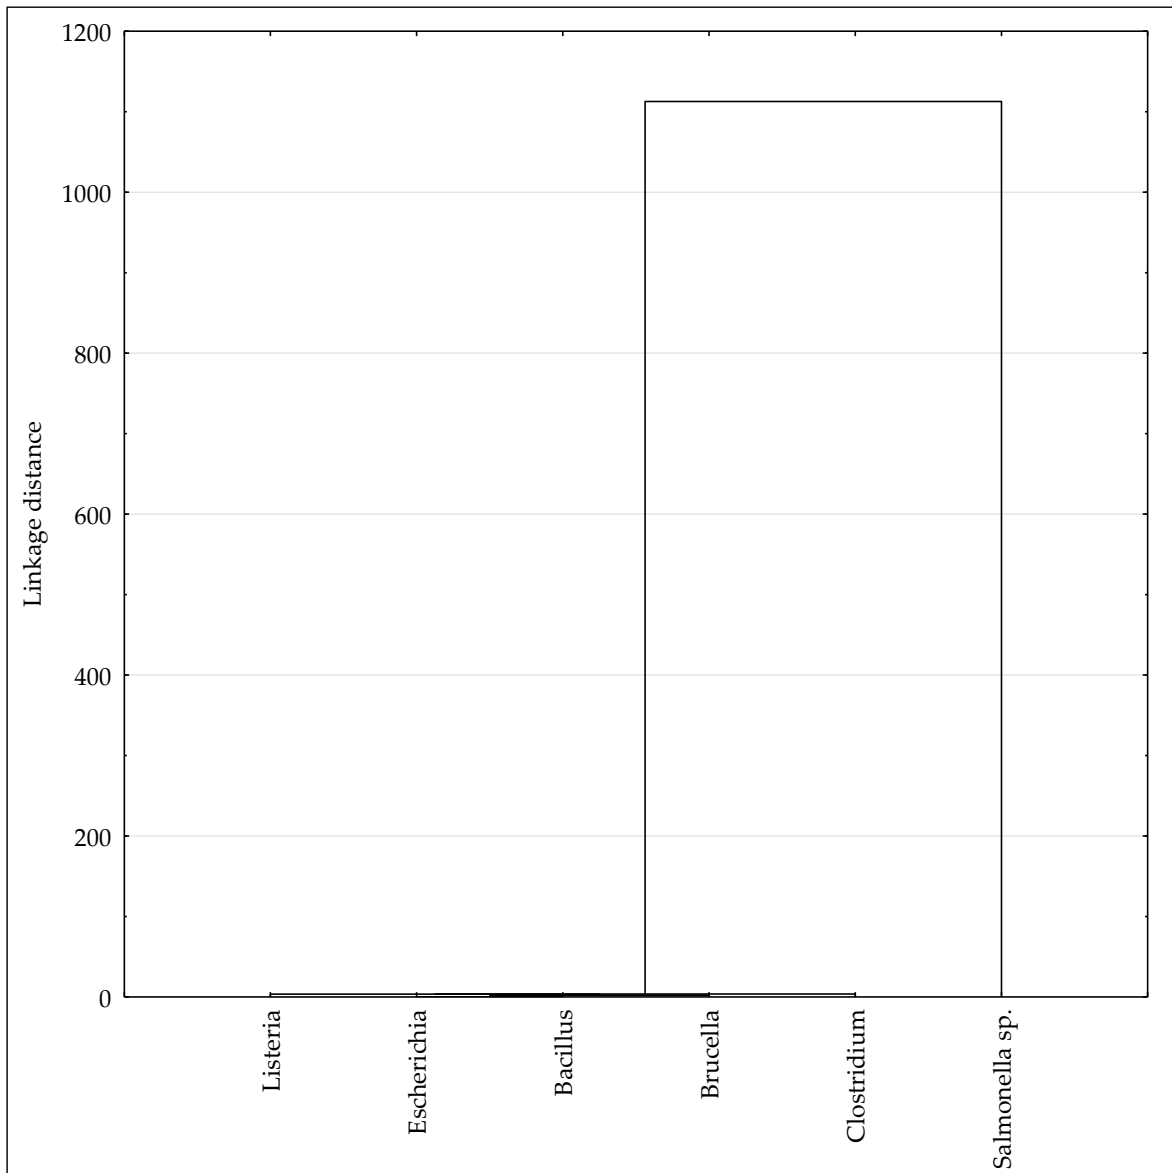

**Figure S15.** Similarities of RASFF notifications on pathogenic microorganisms and notification type within feed using joining.

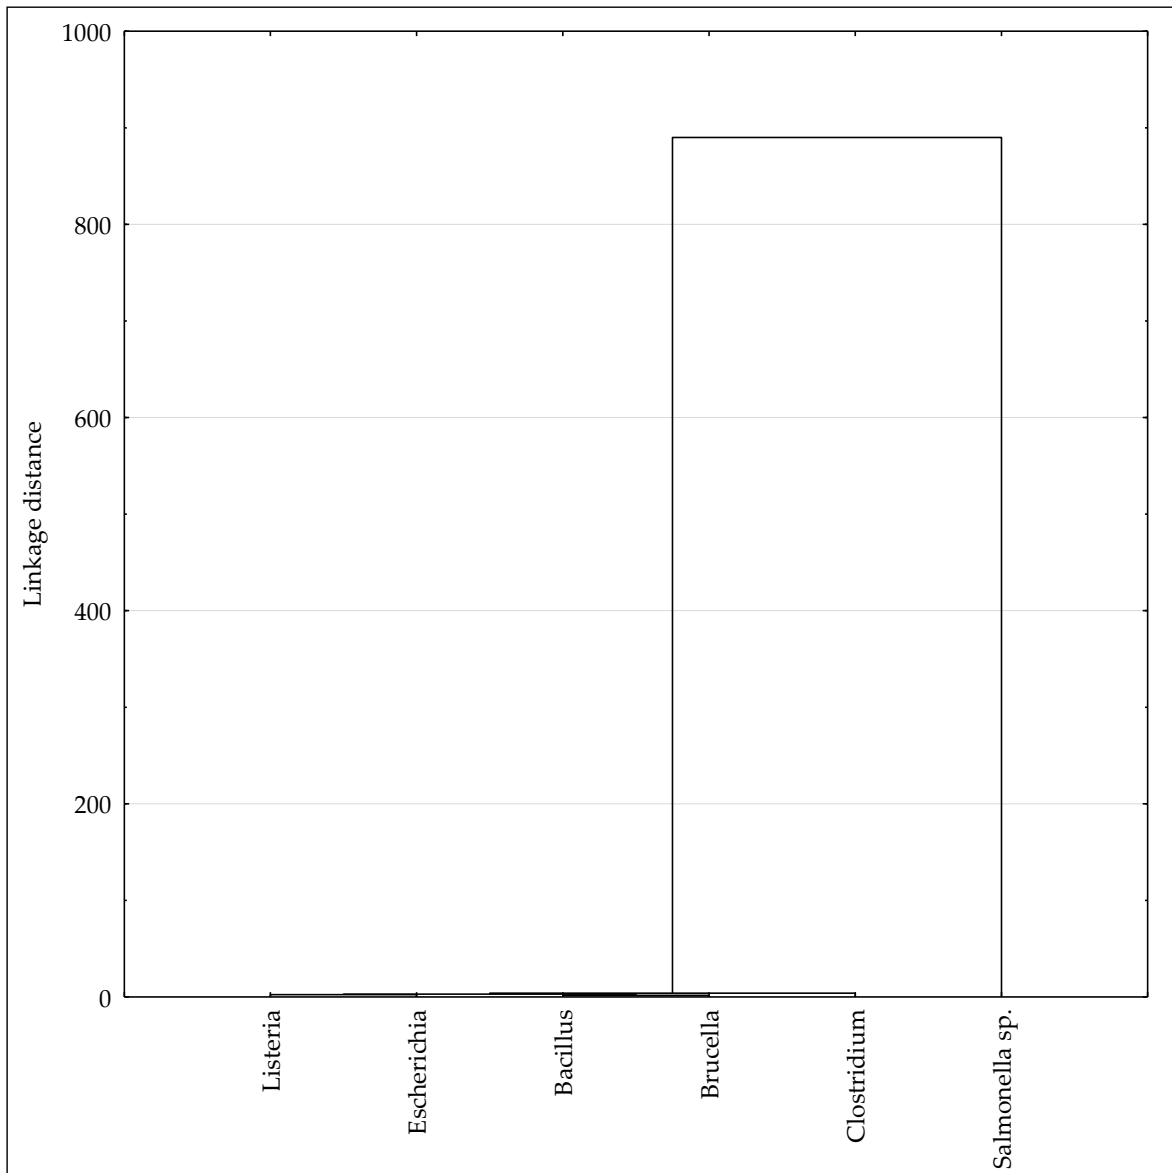

**Figure S16.** Similarities of RASFF notifications on pathogenic microorganisms and distribution status within feed using joining.



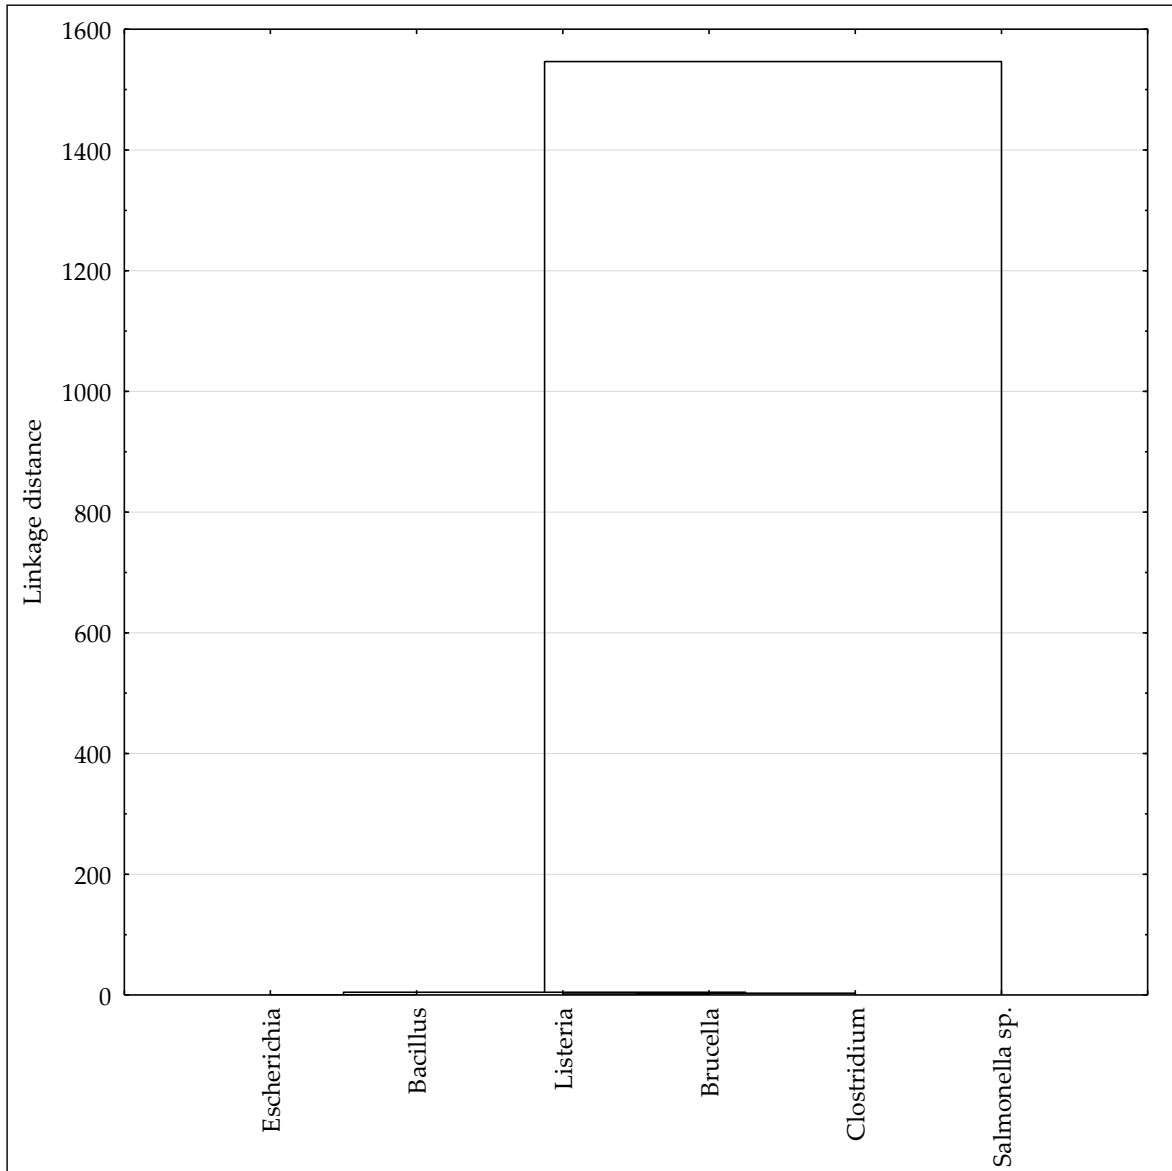

**Figure S17.** Similarities of RASFF notifications on pathogenic microorganisms and risk decision within feed using joining.

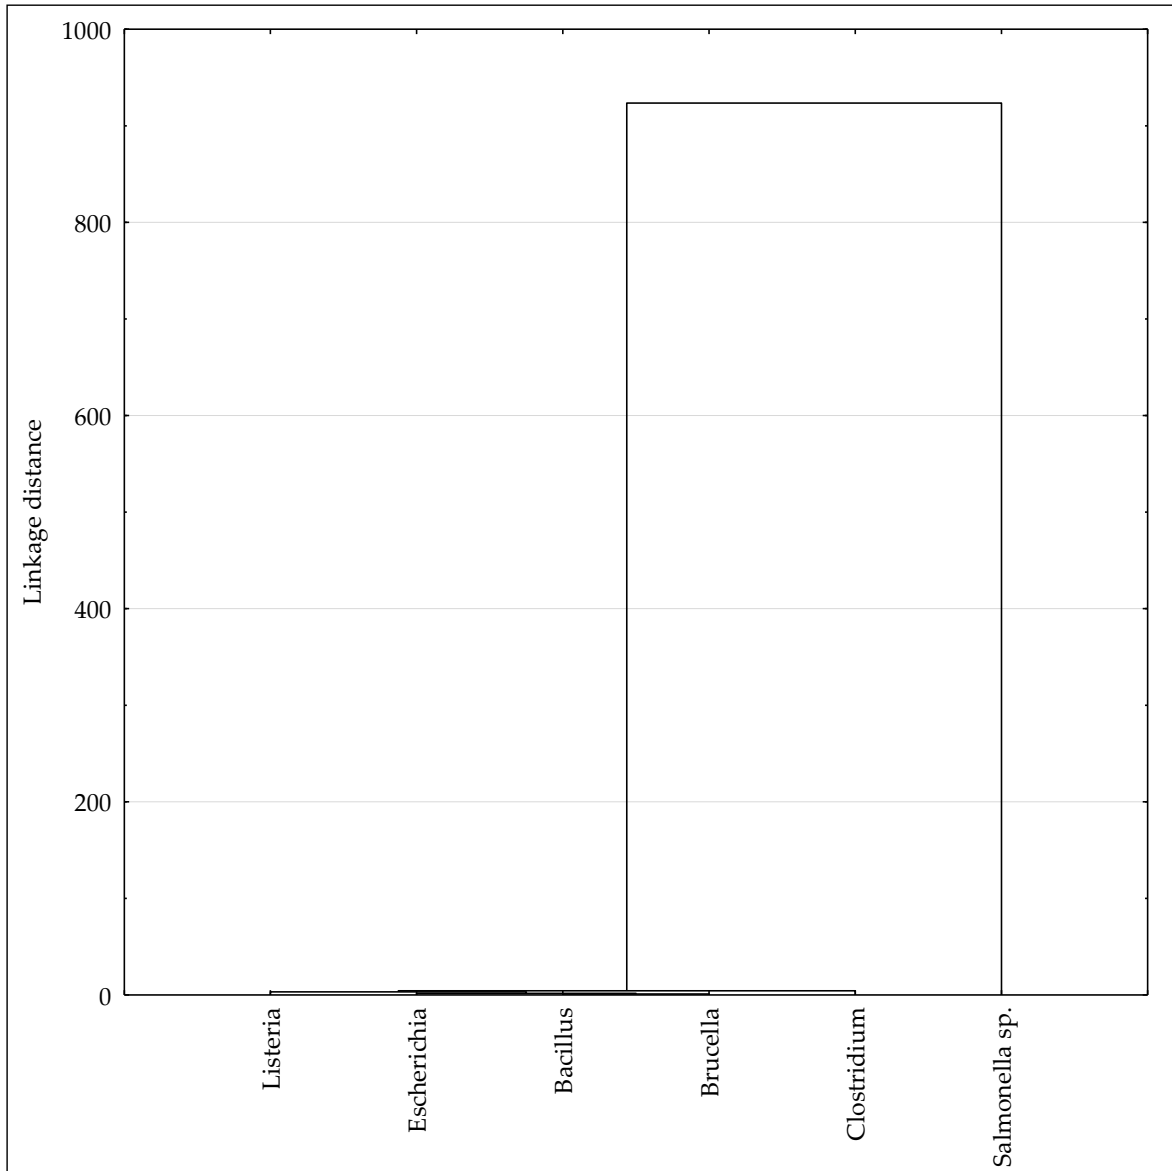

**Figure S18.** Similarities of RASFF notifications on pathogenic microorganisms and action taken within feed using joining.

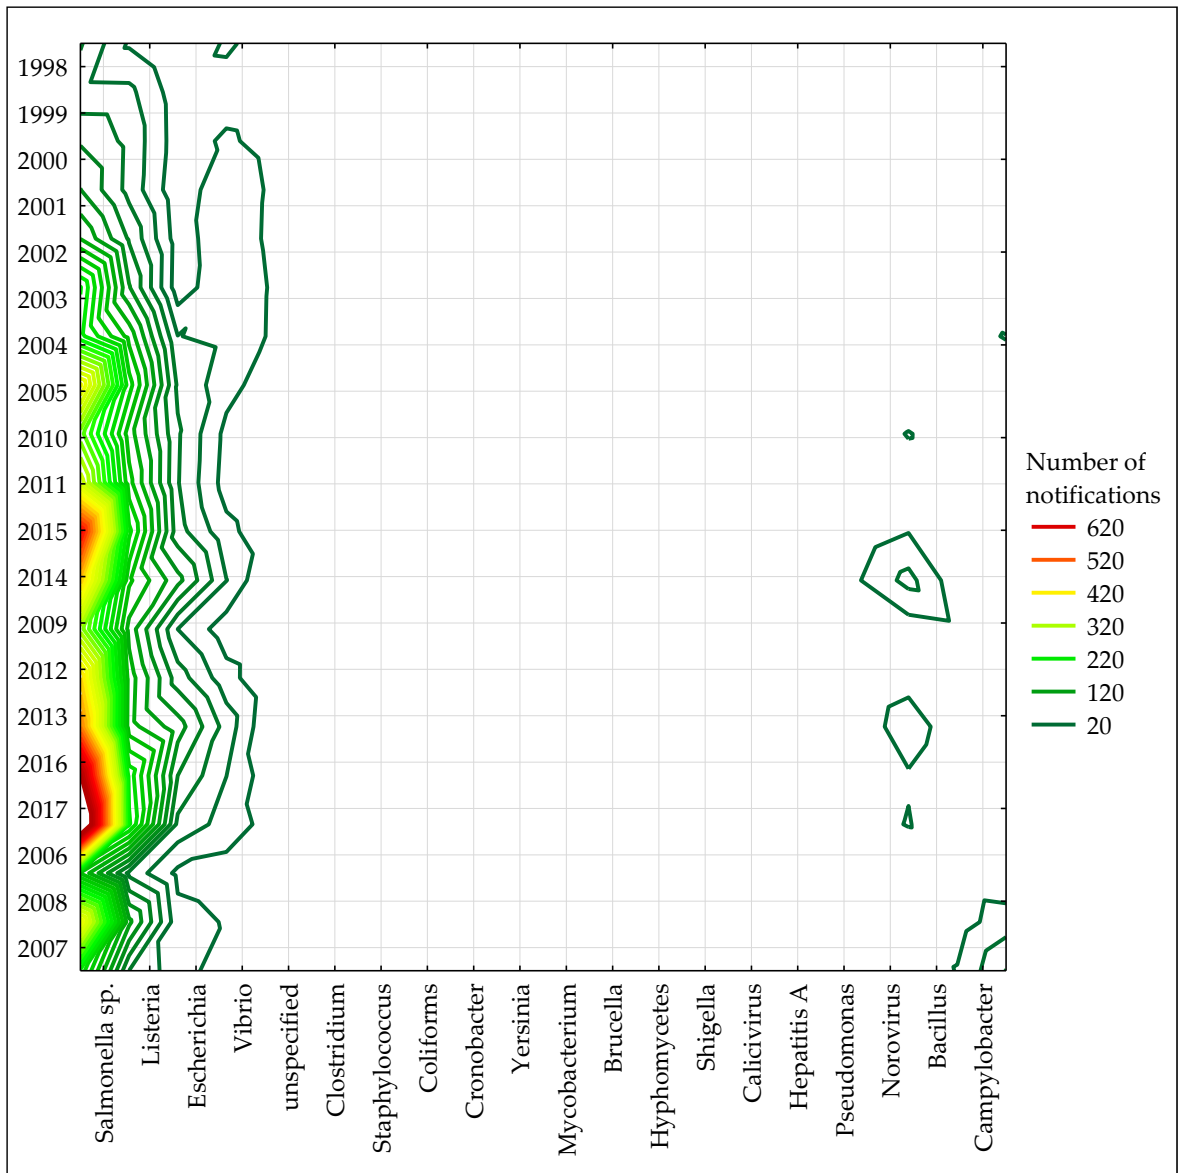

**Figure S19.** Similarities of RASFF notifications on pathogenic microorganisms and year within food using two-way joining.

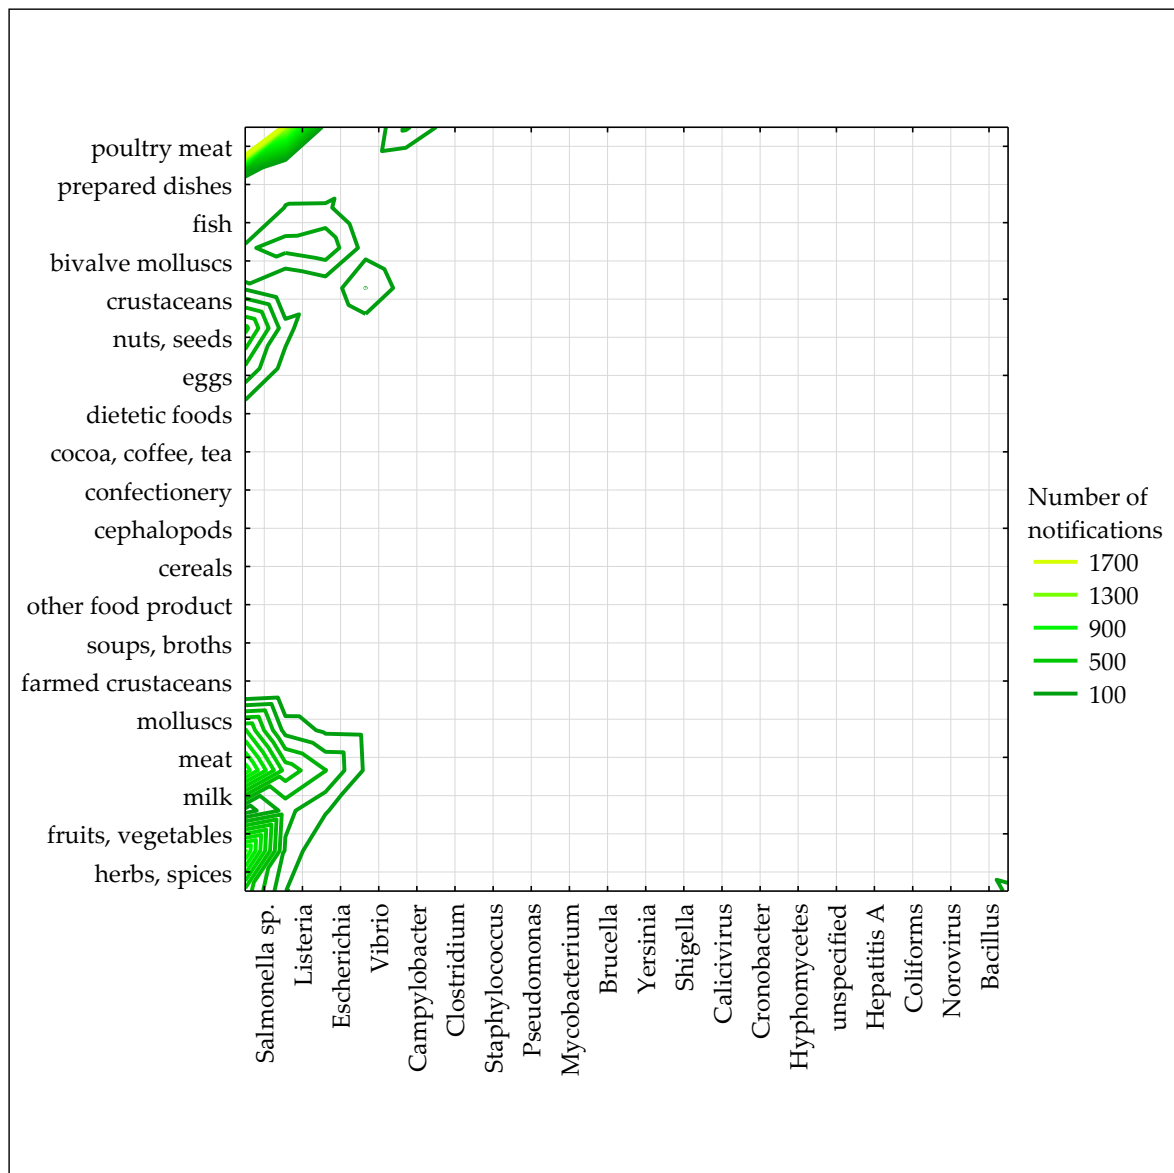

**Figure S20.** Similarities of RASFF notifications on pathogenic microorganisms and product category within food using two-way joining.

- bivalve molluscs – bivalve molluscs and products thereof
- cephalopods – cephalopods and products thereof
- cereals – cereals and bakery products
- cocoa, coffee, tea – cocoa and cocoa preparations, coffee and tea
- crustaceans – crustaceans and products thereof
- dietetic foods – dietetic foods, food supplements, fortified foods
- eggs – eggs and egg products
- farmed crustaceans – farmed crustaceans and products thereof - (obsolete)
- fish – fish and fish products
- fruits, vegetables – fruits and vegetables
- herbs, spices – herbs and spices
- meat – meat and meat products (other than poultry)
- milk – milk and milk products
- molluscs – molluscs and products thereof - (obsolete)
- nuts, seeds – nuts, nut products and seeds
- other food product – other food product / mixed
- poultry meat – poultry meat and poultry meat products
- prepared dishes – prepared dishes and snacks
- soups, broths – soups, broths, sauces and condiments

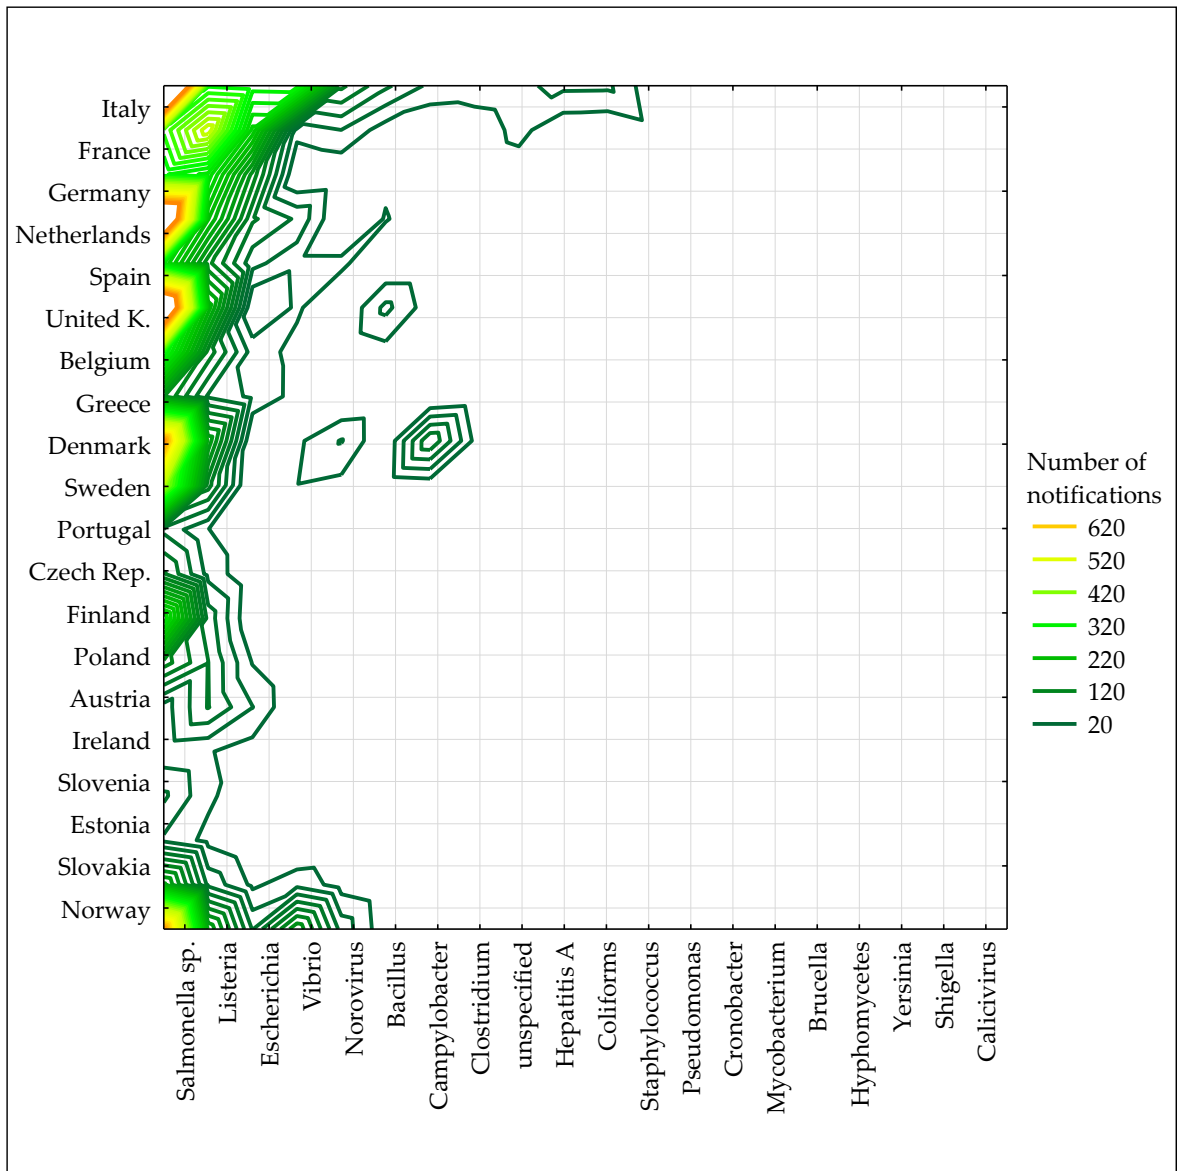

**Figure S21.** Similarities of RASFF notifications on pathogenic microorganisms and notifying country within food using two-way joining.

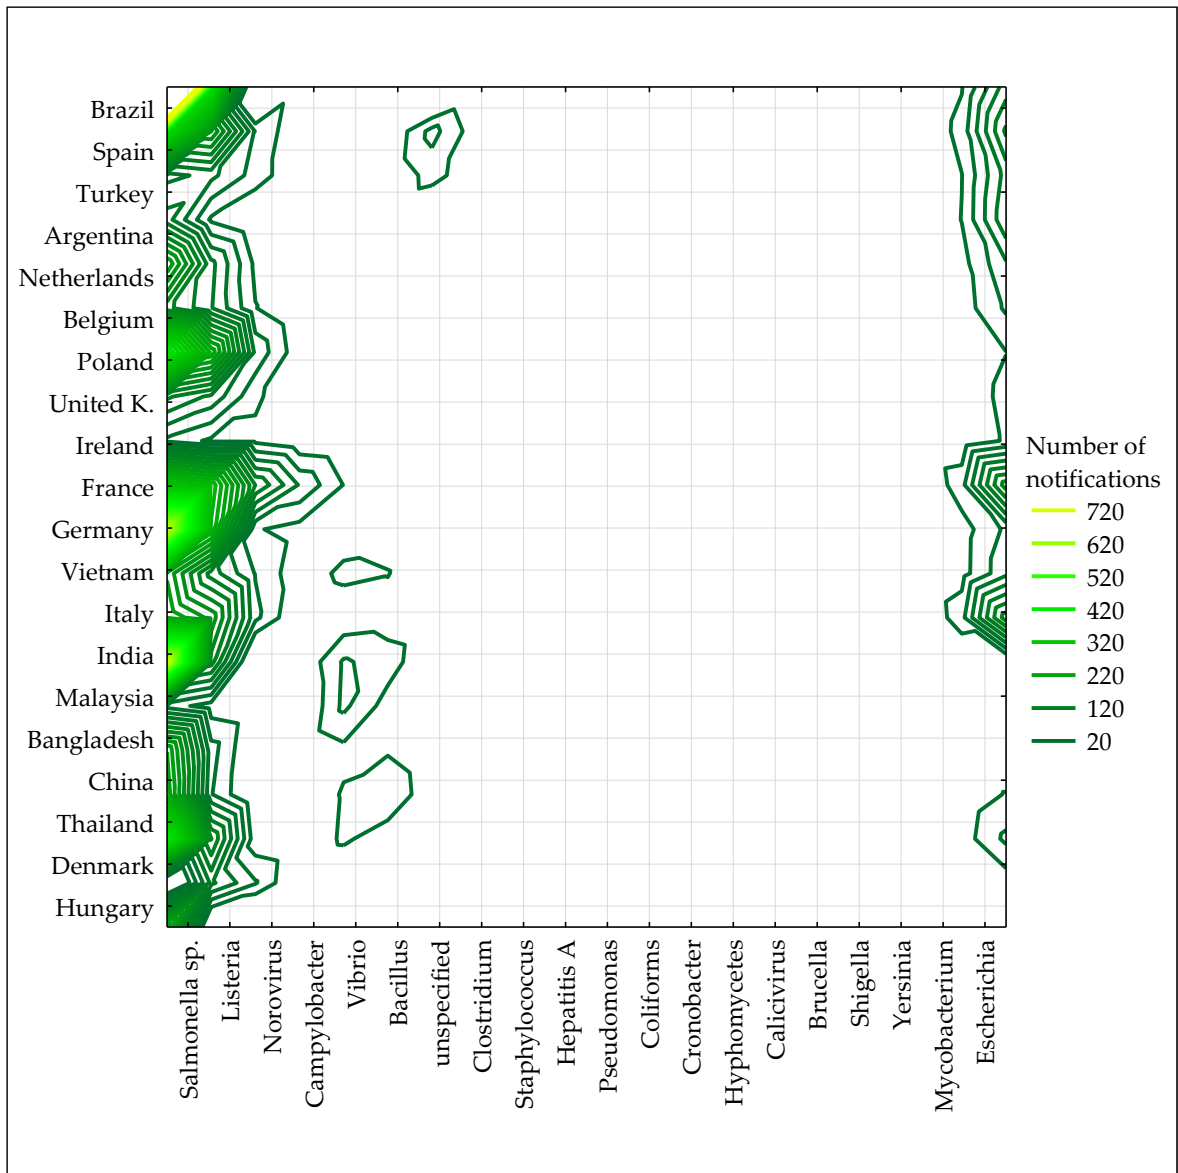

**Figure S22.** Similarities of RASFF notifications on pathogenic microorganisms and origin country within food using two-way joining.

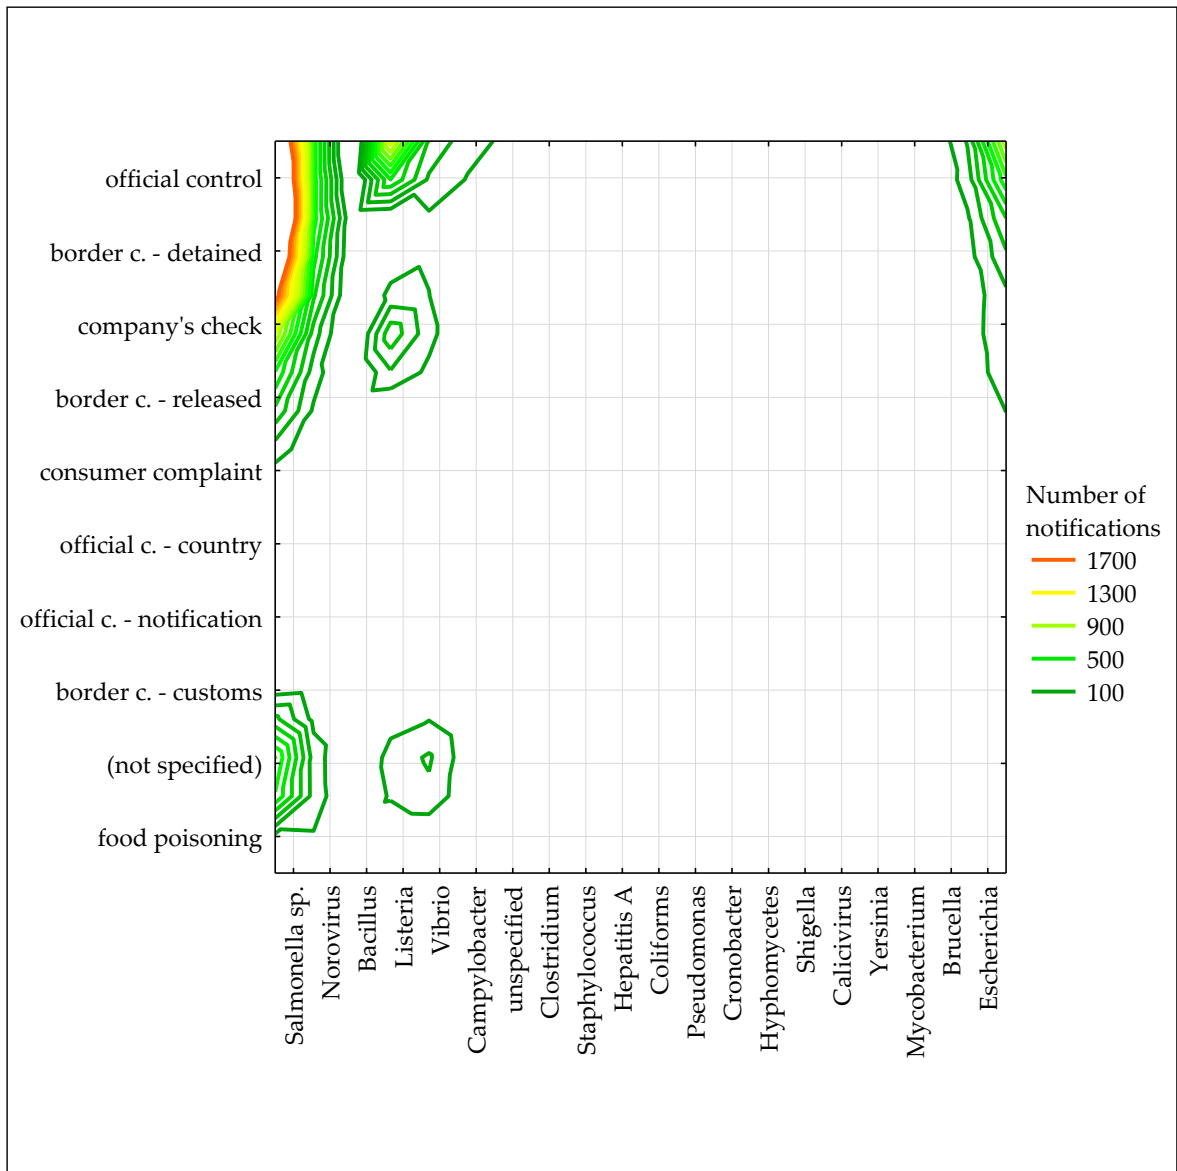

**Figure S23.** Similarities of RASFF notifications on pathogenic microorganisms and notification basis within food using two-way joining.

border c. - customs – border control - consignment under customs

border c. - detained – border control - consignment detained

border c. - released – border control - consignment released

company's check – company's own check

official c. - country – official control in non-member country

official c. - notification – official control following RASFF notification

official control – official control on the market

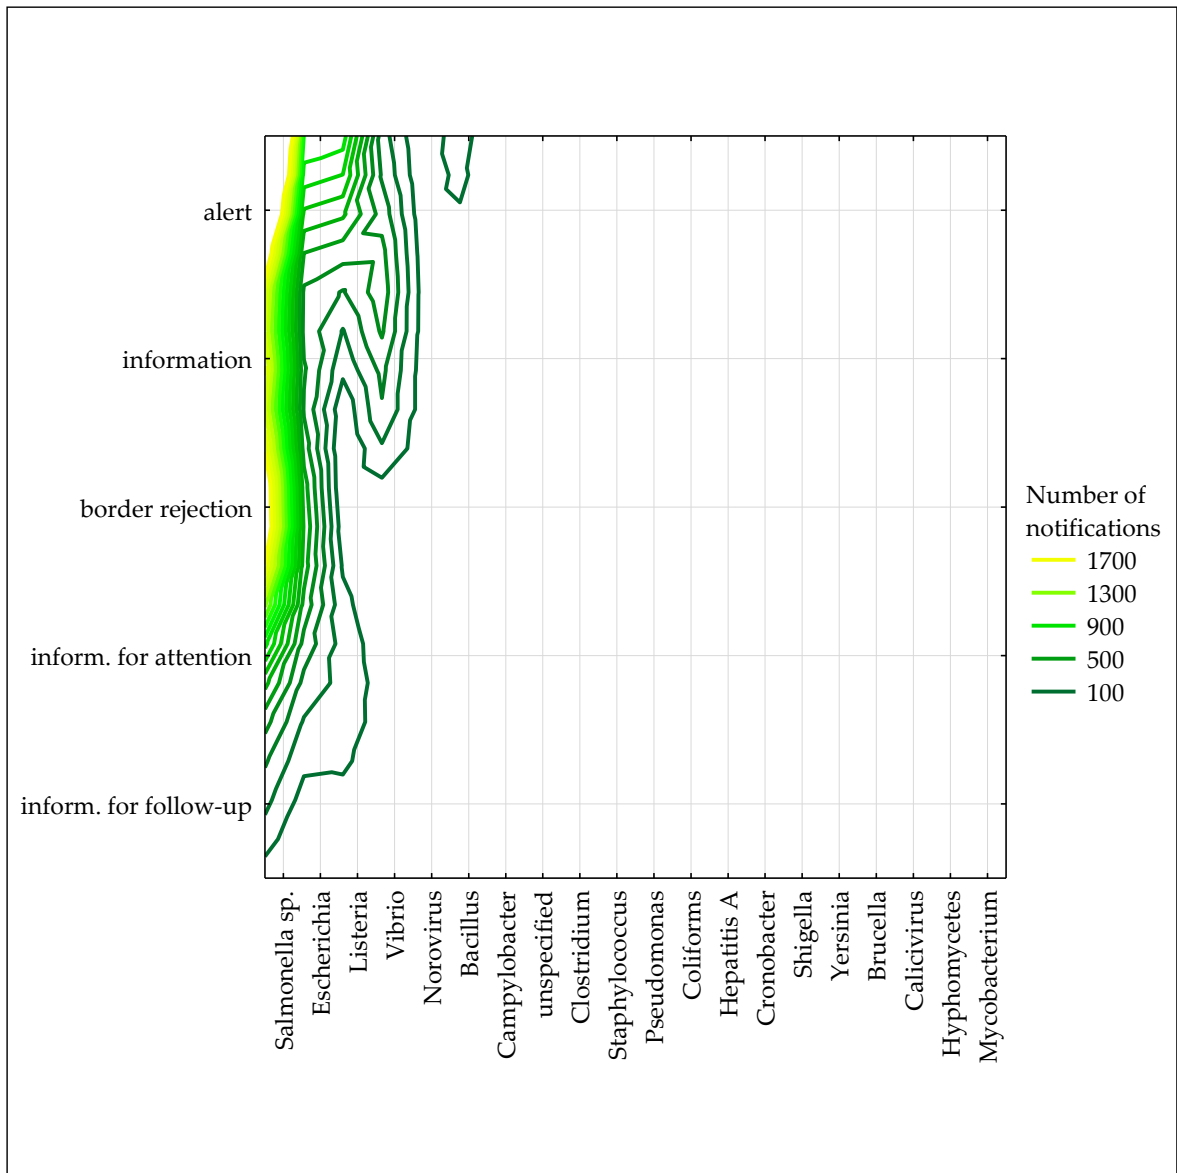

**Figure S24.** Similarities of RASFF notifications on pathogenic microorganisms and notification type within food using two-way joining.

inform. for attention – information for attention

inform. for follow-up – information for follow-up



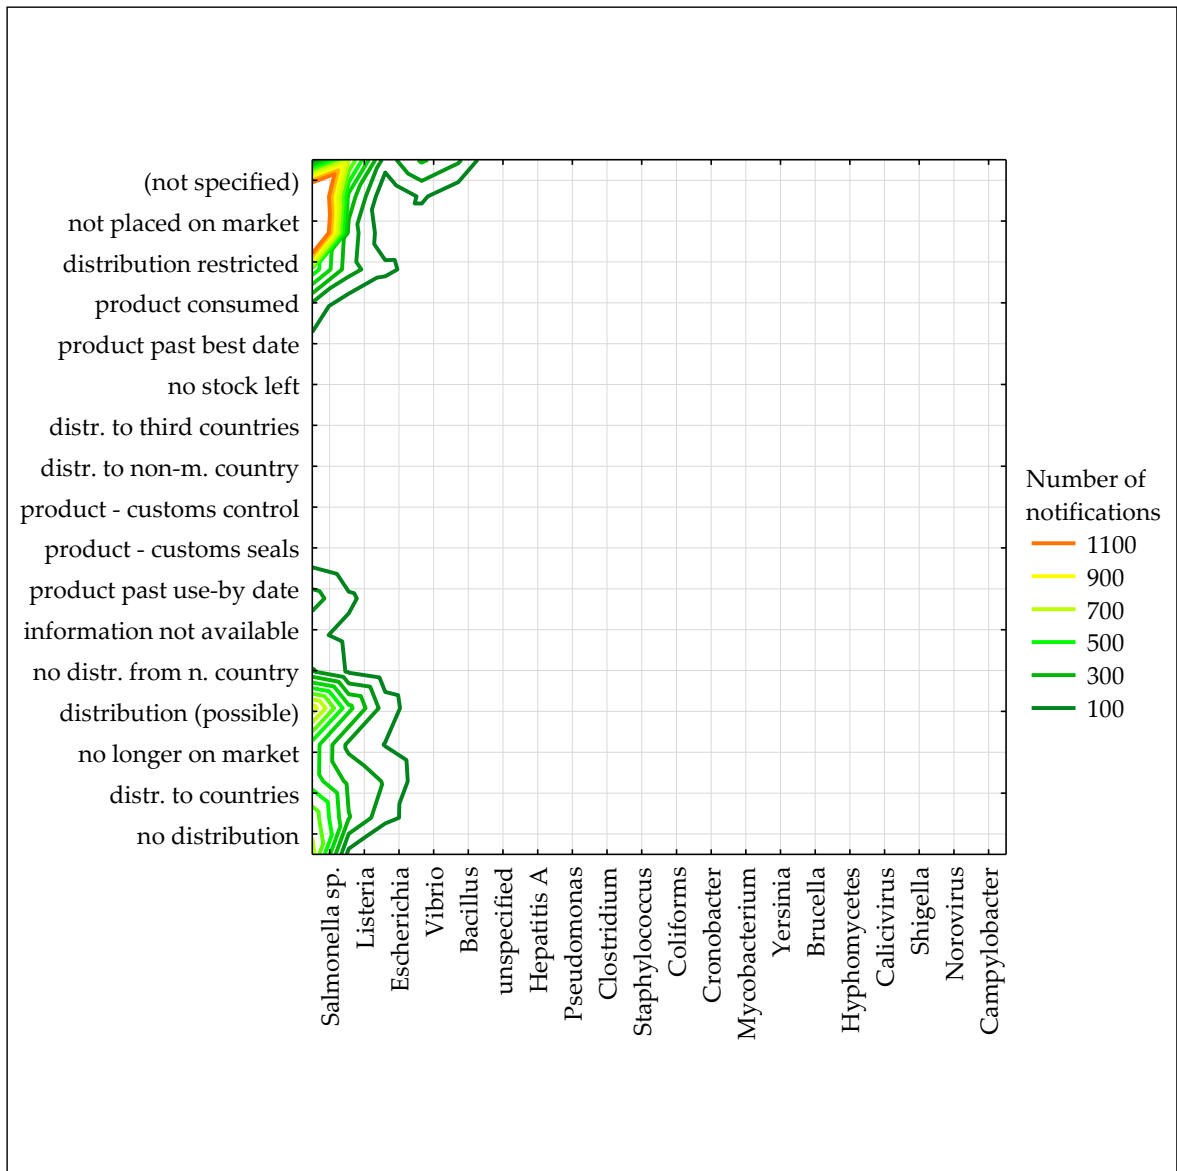

**Figure S25.** Similarities of RASFF notifications on pathogenic microorganisms and distribution status within food using two-way joining.

distr. to non-m. countries – distribution to non-member countries

distr. to countries – distribution to other member countries

distr. to third countries – distribution to third countries

distribution (possible) – distribution on the market (possible)

distribution restricted – distribution restricted to notifying country

information not available – information on distribution not (yet) available

no distr. from n. country – no distribution from notifying country

no longer on market – product (presumably) no longer on the market

not placed on market – product not (yet) placed on the market

product - customs control – product under customs control

product - customs seals – product allowed to travel to destination under customs seals

product consumed – product already consumed

product past best date – product past best before date

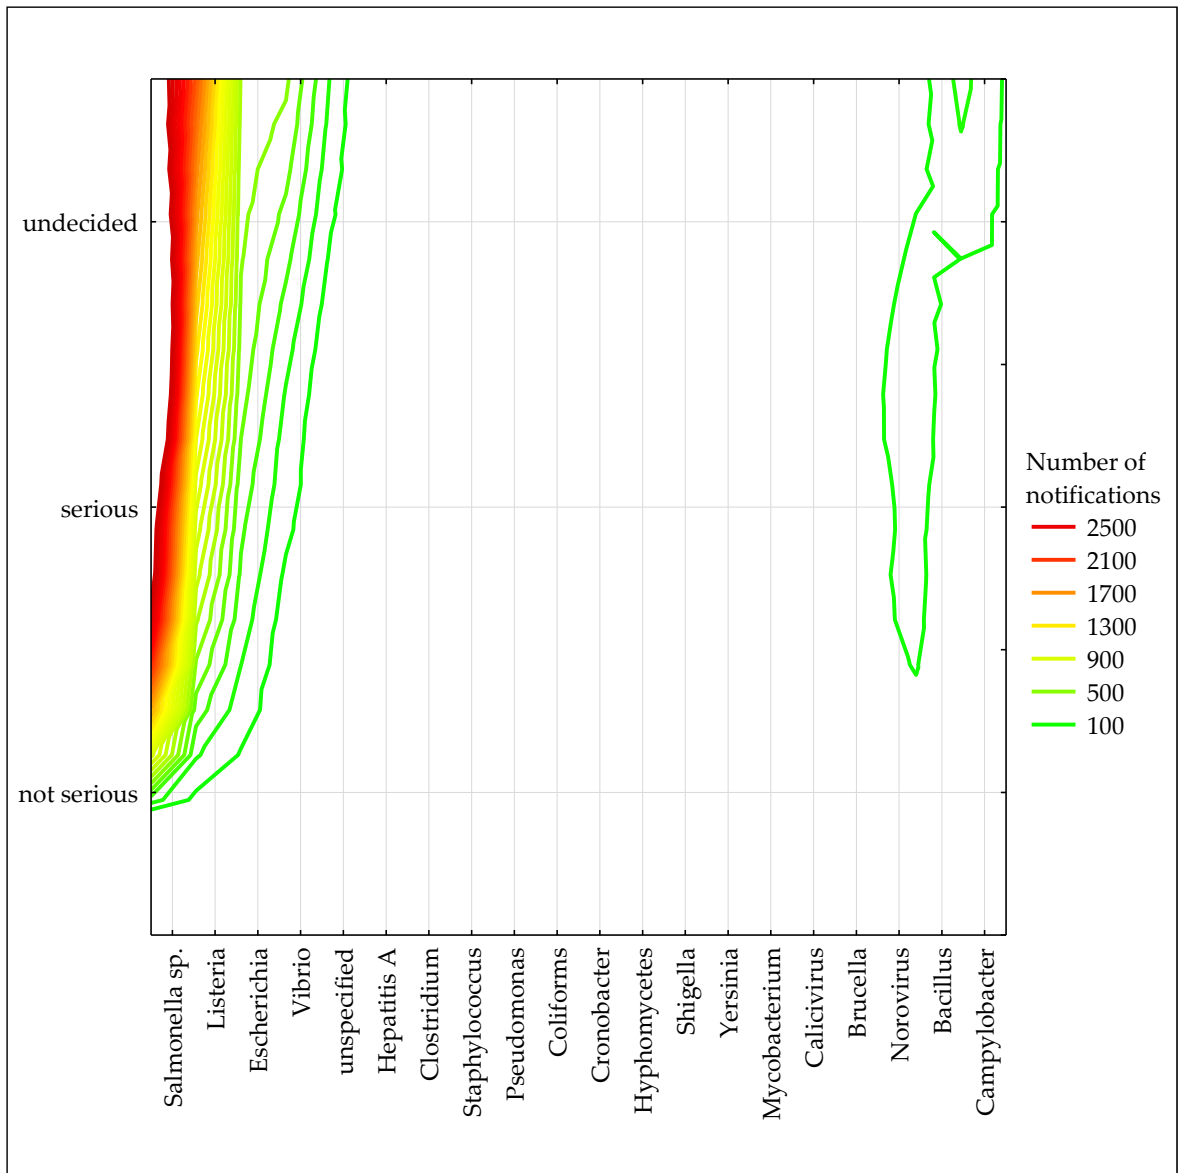

**Figure S26.** Similarities of RASFF notifications on pathogenic microorganisms and risk decision within food using two-way joining.

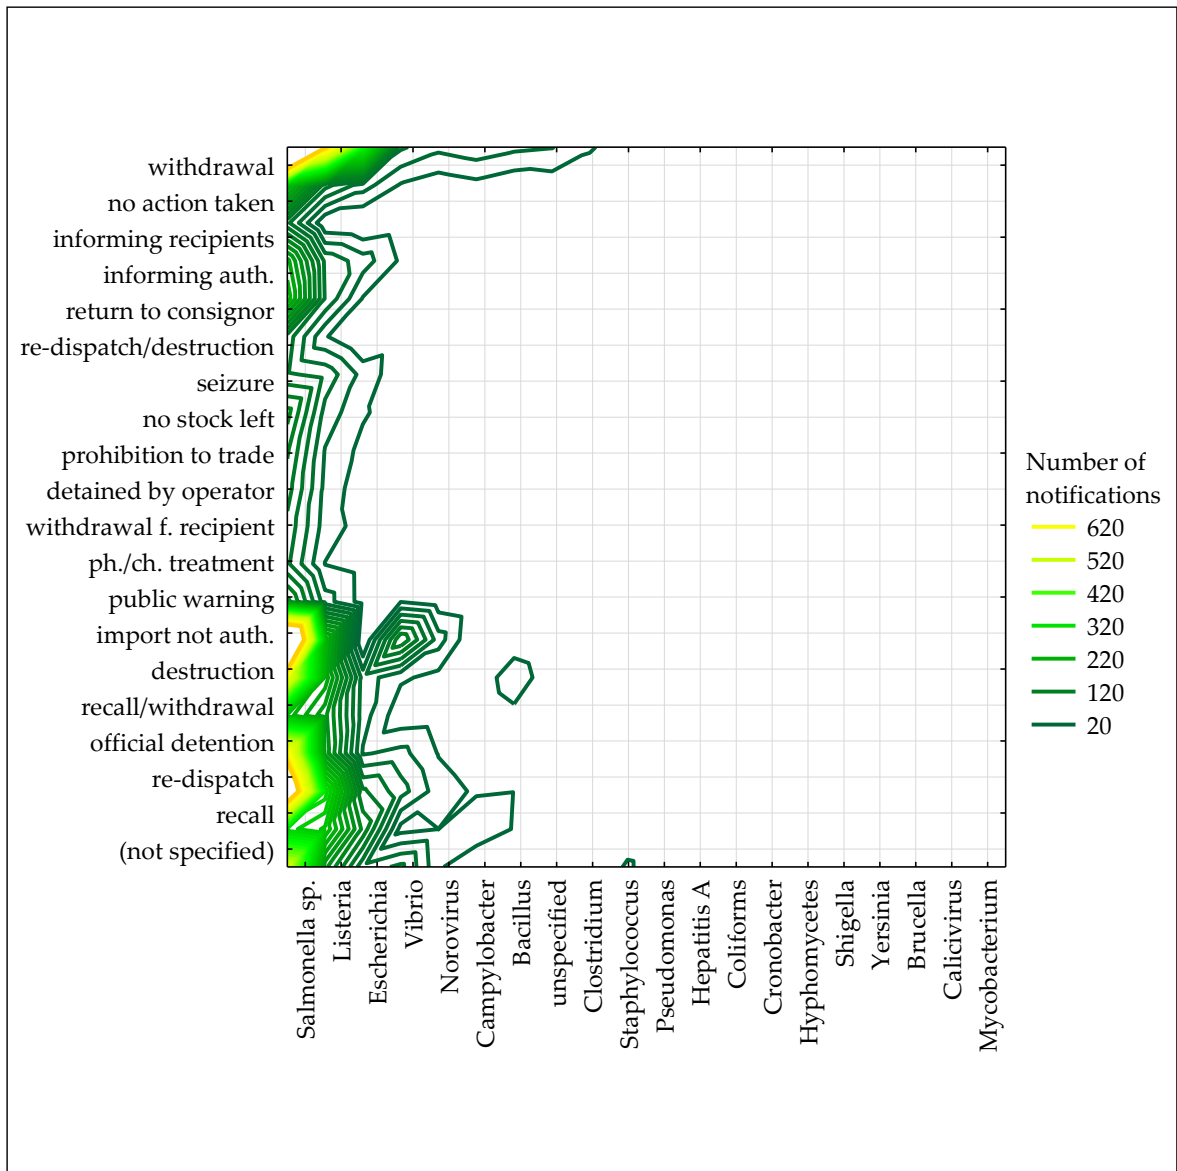

**Figure S27.** Similarities of RASFF notifications on pathogenic microorganisms and action taken within food using two-way joining.

import not auth. – import not authorised  
 informing auth. – informing authorities  
 ph./ch. treatment – physical/chemical treatment  
 prohibition to trade – prohibition to trade - sales ban  
 public warning – public warning - press release  
 recall – recall from consumers  
 recall/withdrawal – product recall or withdrawal  
 re-dispatch/destruction – re-dispatch or destruction  
 withdrawal – withdrawal from the market  
 withdrawal f. recipient – withdrawal from recipient(s)

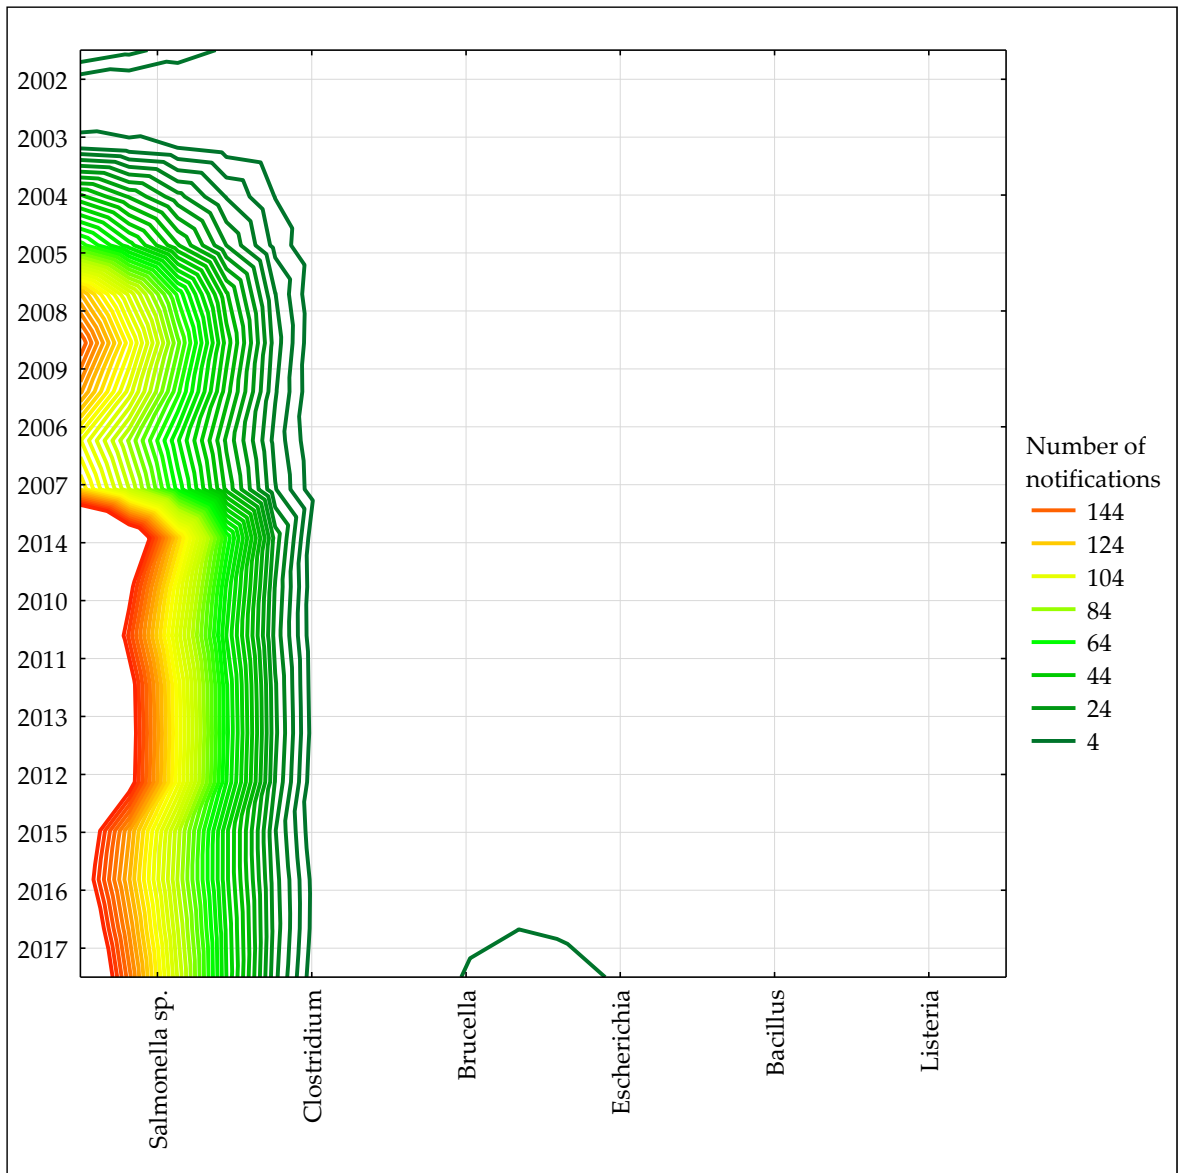

**Figure S28.** Similarities of RASFF notifications on pathogenic microorganisms and year within feed using two-way joining.

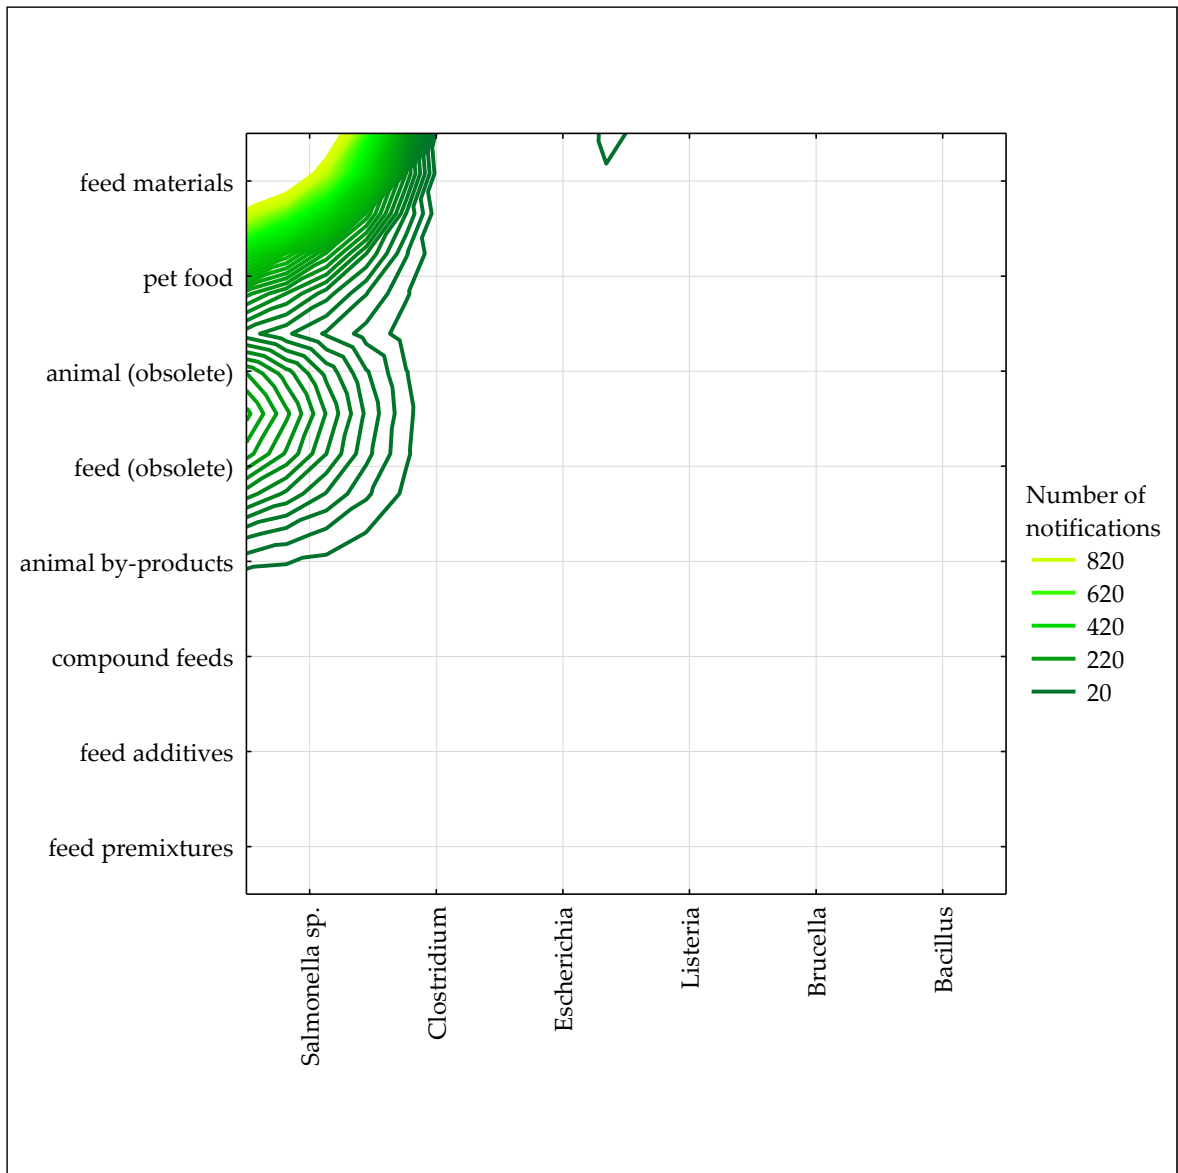

**Figure S29.** Similarities of RASFF notifications on pathogenic microorganisms and product category within feed using two-way joining.

animal (obsolete) – animal nutrition - (obsolete)

feed (obsolete) – feed for food-producing animals - (obsolete)

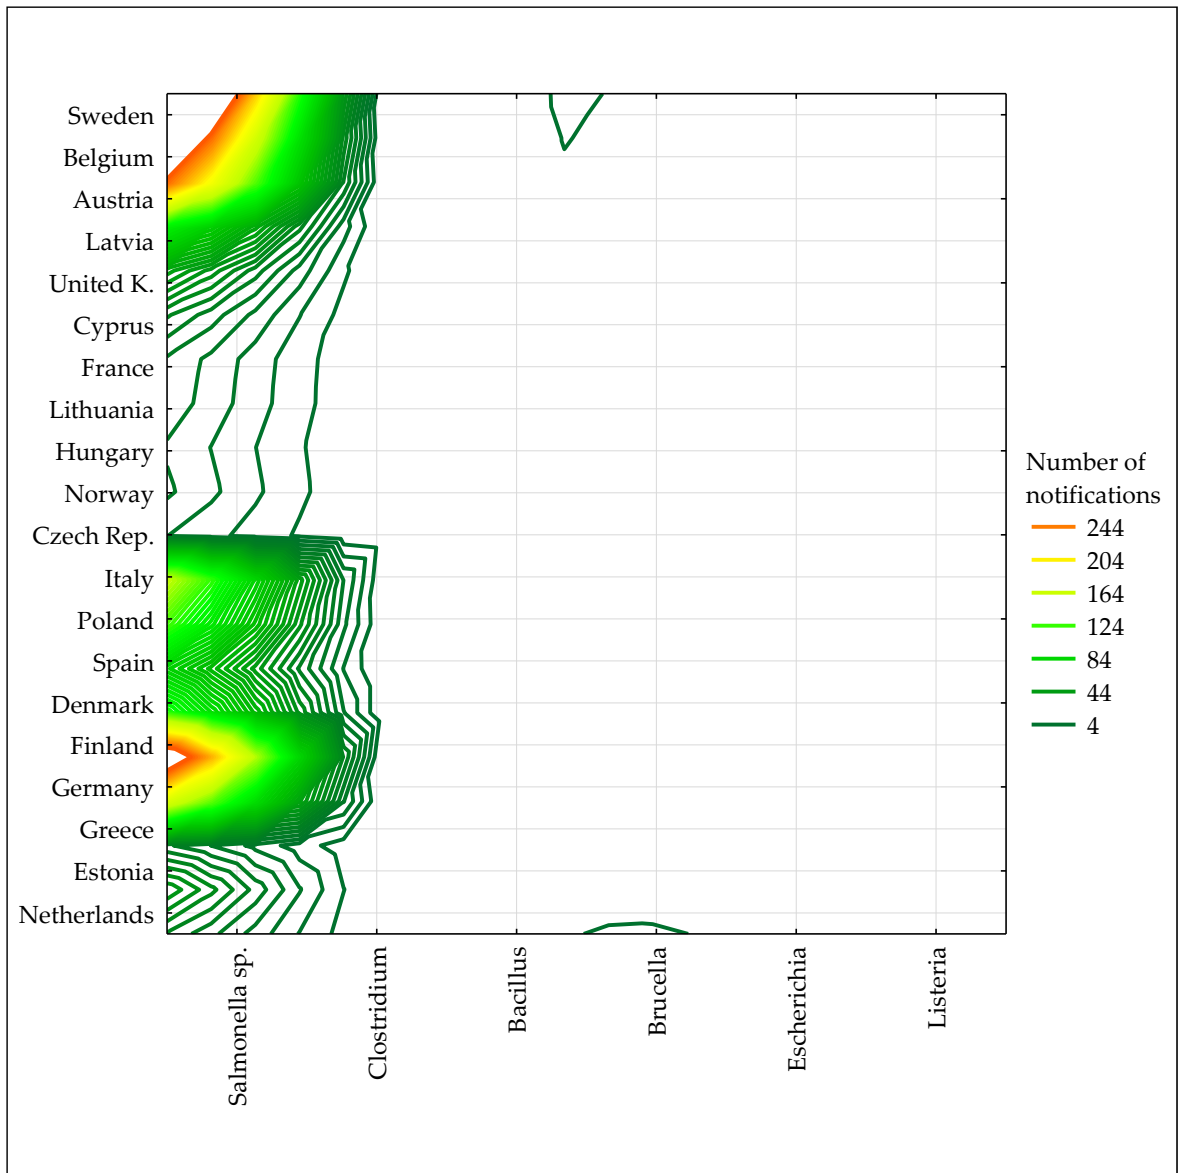

**Figure S30.** Similarities of RASFF notifications on pathogenic microorganisms and notifying country within feed using two-way joining.

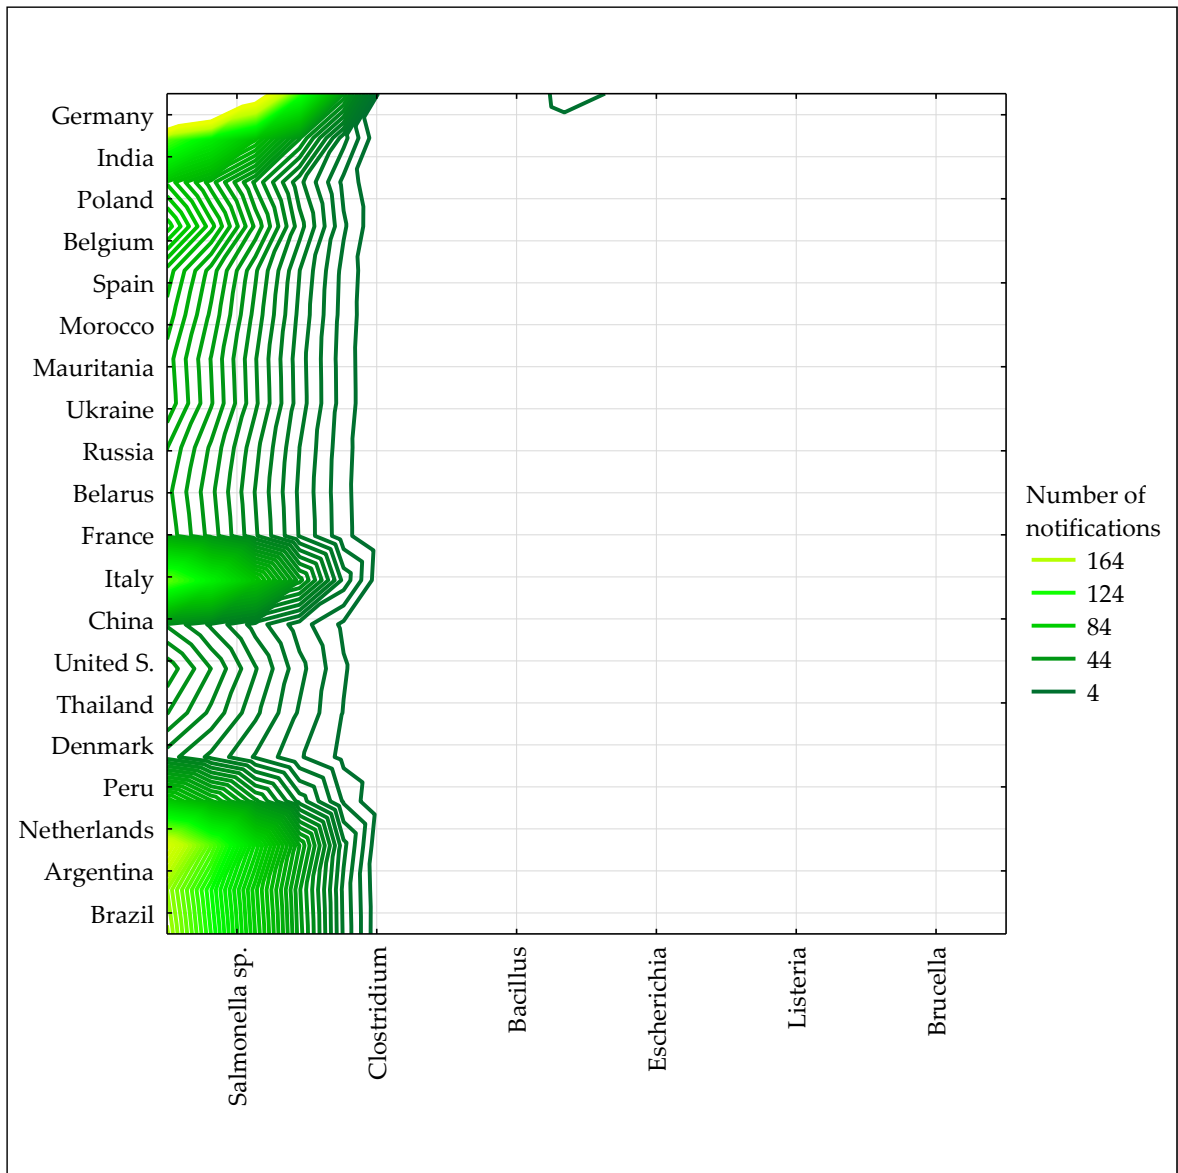

**Figure S31.** Similarities of RASFF notifications on pathogenic microorganisms and origin country within feed using two-way joining.

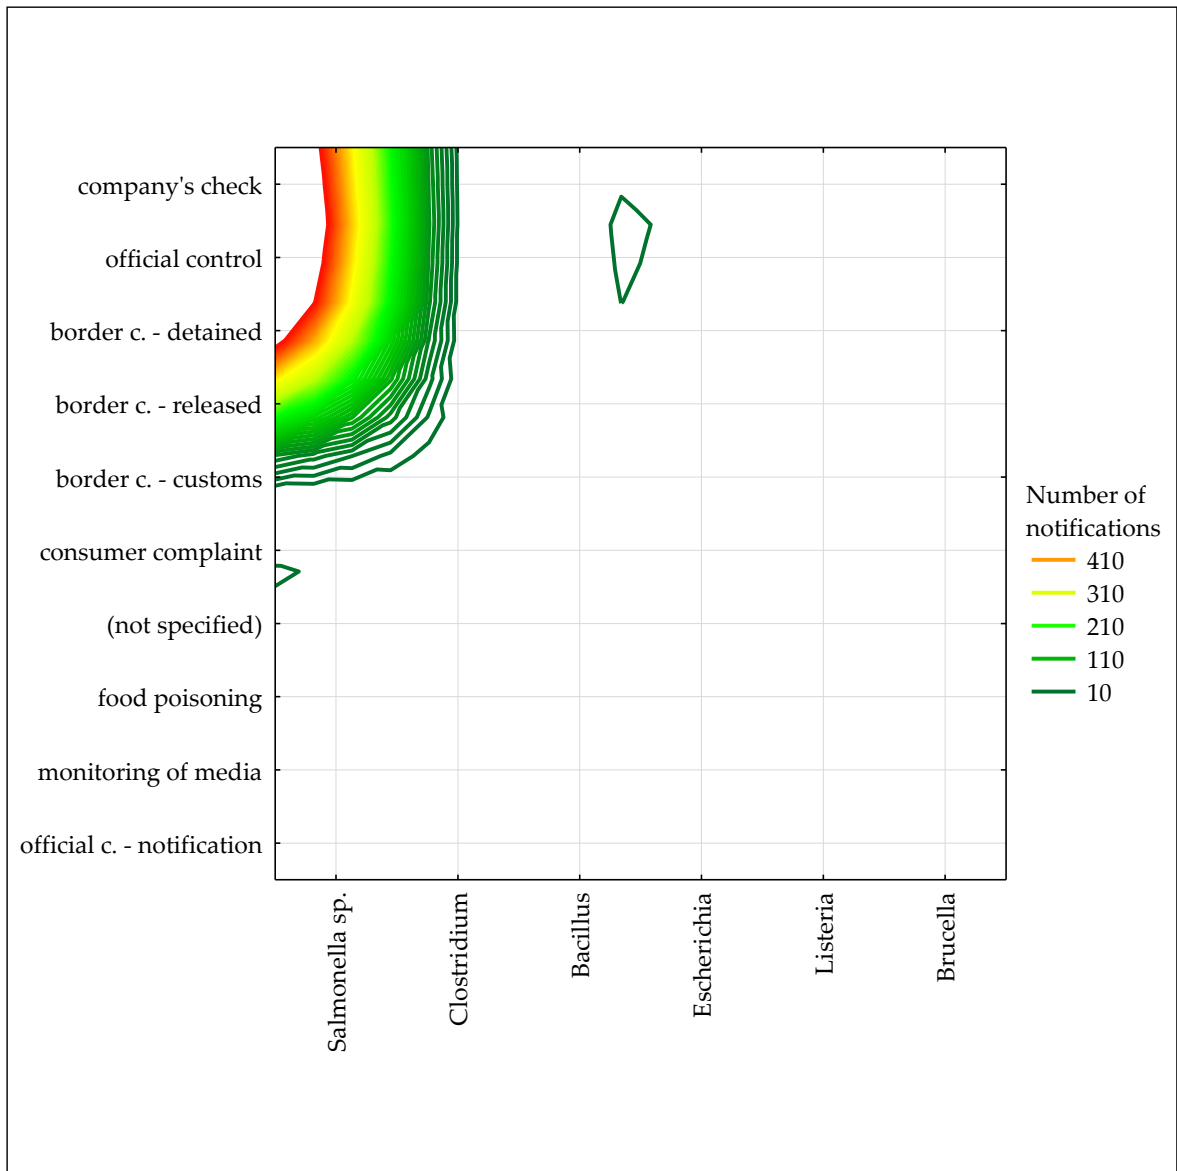

**Figure S32.** Similarities of RASFF notifications on pathogenic microorganisms and notification basis within feed using two-way joining.

border c. - customs – border control - consignment under customs  
border c. - detained – border control - consignment detained  
border c. - released – border control - consignment released  
company's check – company's own check  
official c. - notification – official control following RASFF notification  
official control – official control on the market



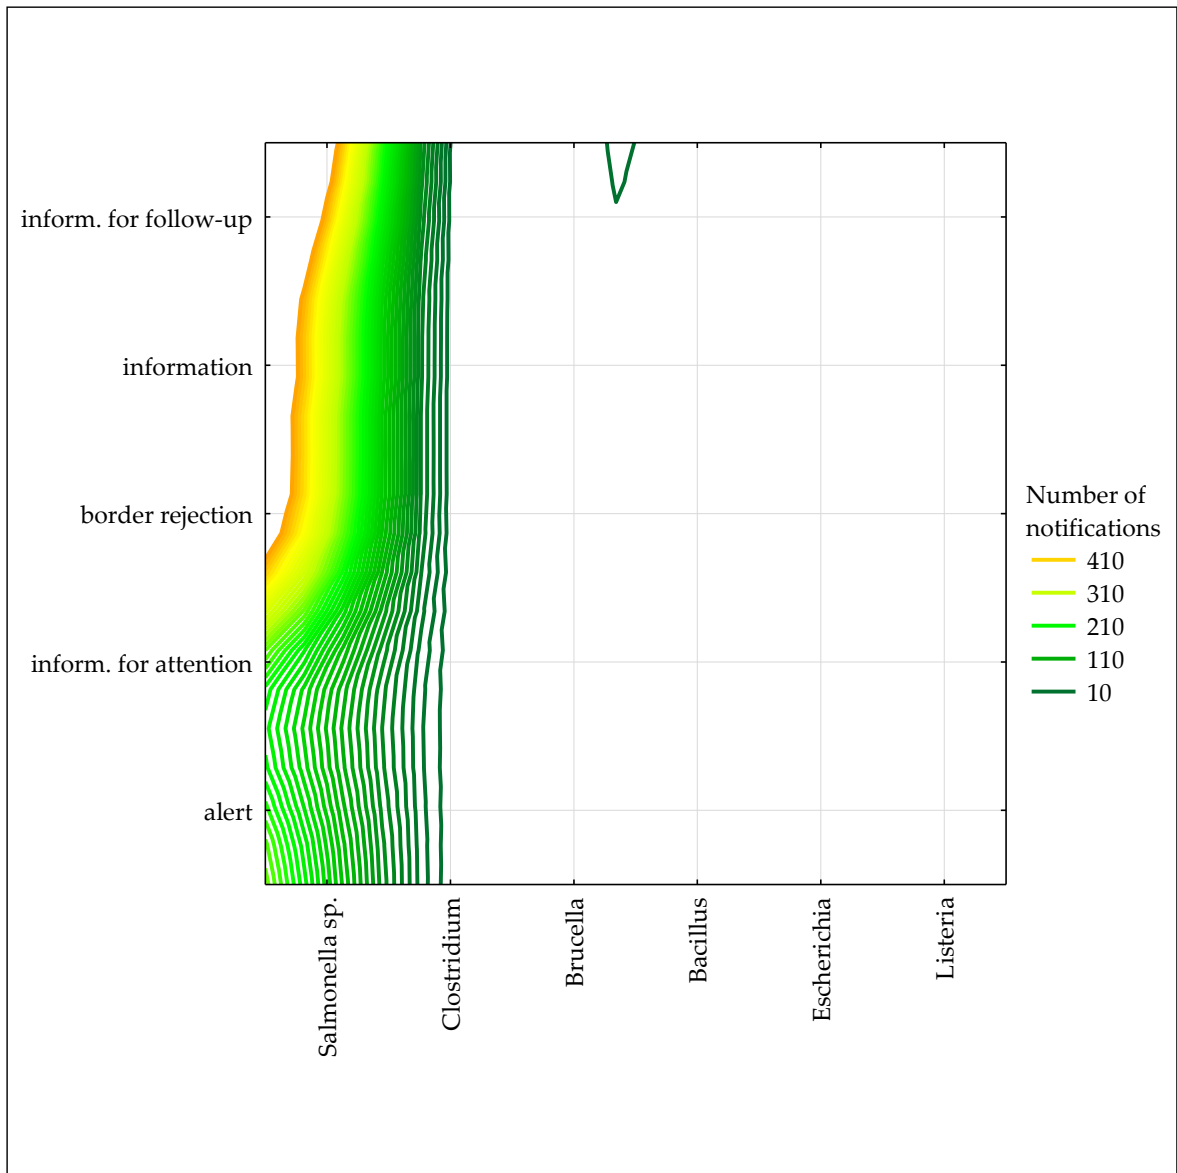

**Figure S33.** Similarities of RASFF notifications on pathogenic microorganisms and notification type within feed using two-way joining.

inform. for attention – information for attention  
 inform. for follow-up – information for follow-up

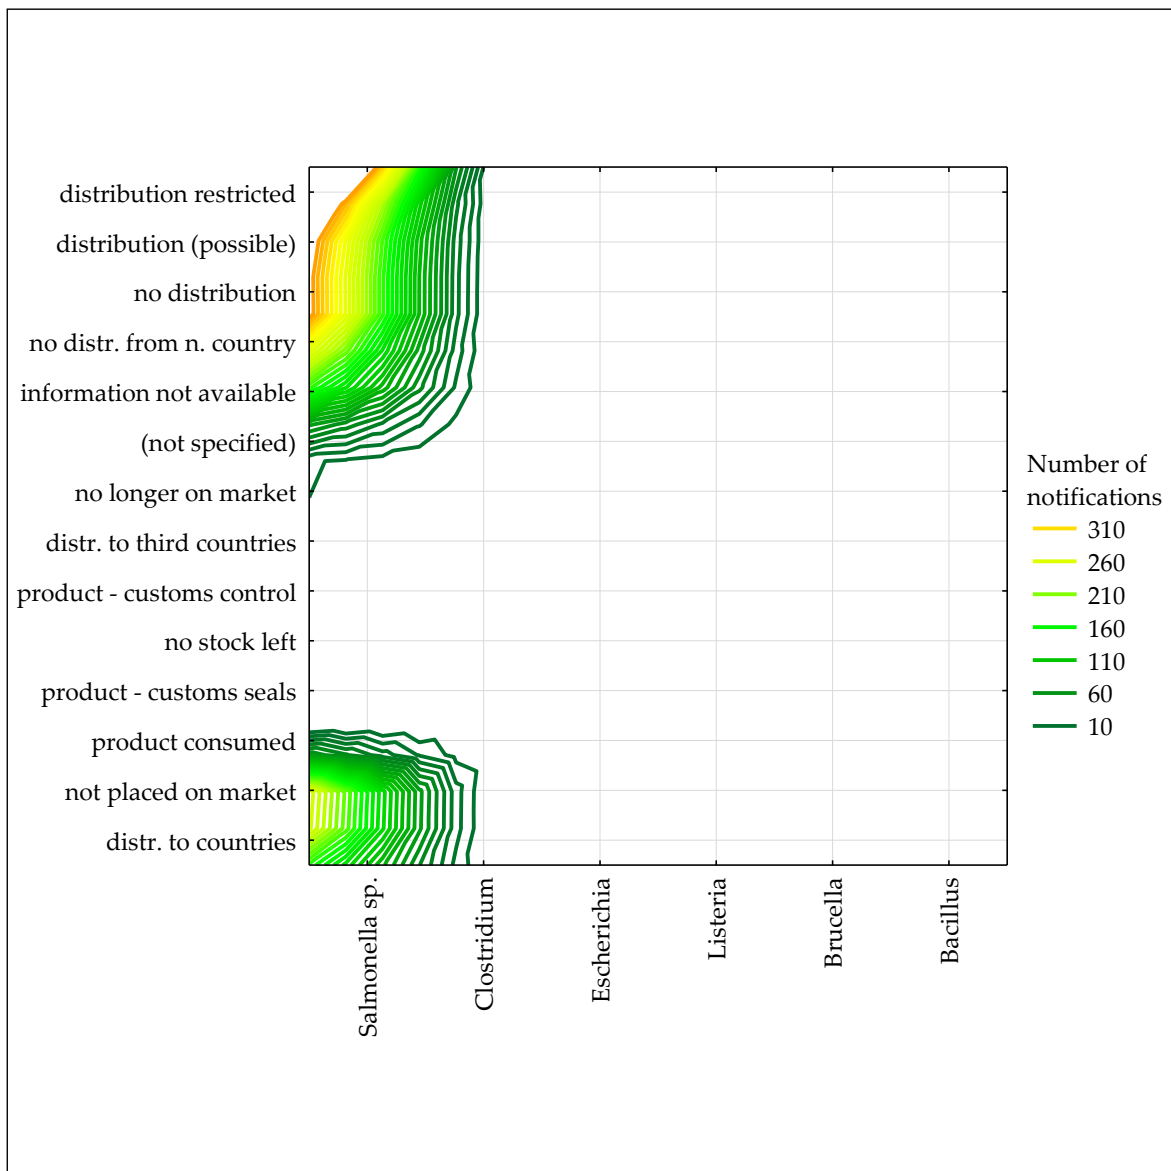

**Figure S34.** Similarities of RASFF notifications on pathogenic microorganisms and distribution status within feed using two-way joining.

distr. to countries – distribution to other member countries

distr. to third countries – distribution to third countries

distribution (possible) – distribution on the market (possible)

distribution restricted – distribution restricted to notifying country

information not available – information on distribution not (yet) available

no distr. from n. country – no distribution from notifying country

no longer on market – product (presumably) no longer on the market

not placed on market – product not (yet) placed on the market

product - customs control – product under customs control

product - customs seals – product allowed to travel to destination under customs seals

product consumed – product already consumed

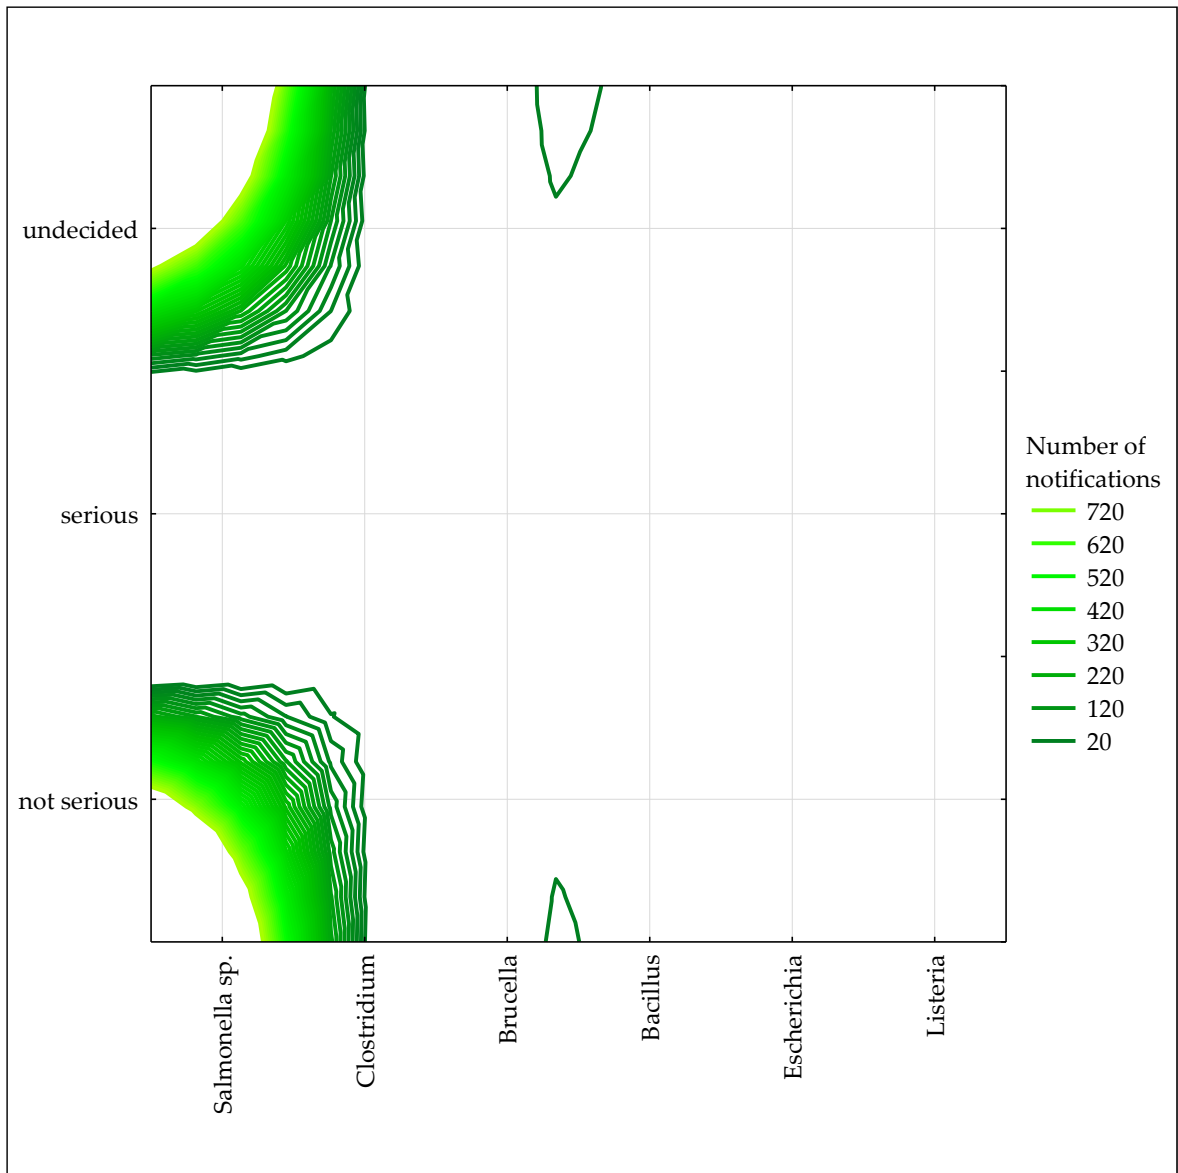

**Figure S35.** Similarities of RASFF notifications on pathogenic microorganisms and risk decision within feed using two-way joining.

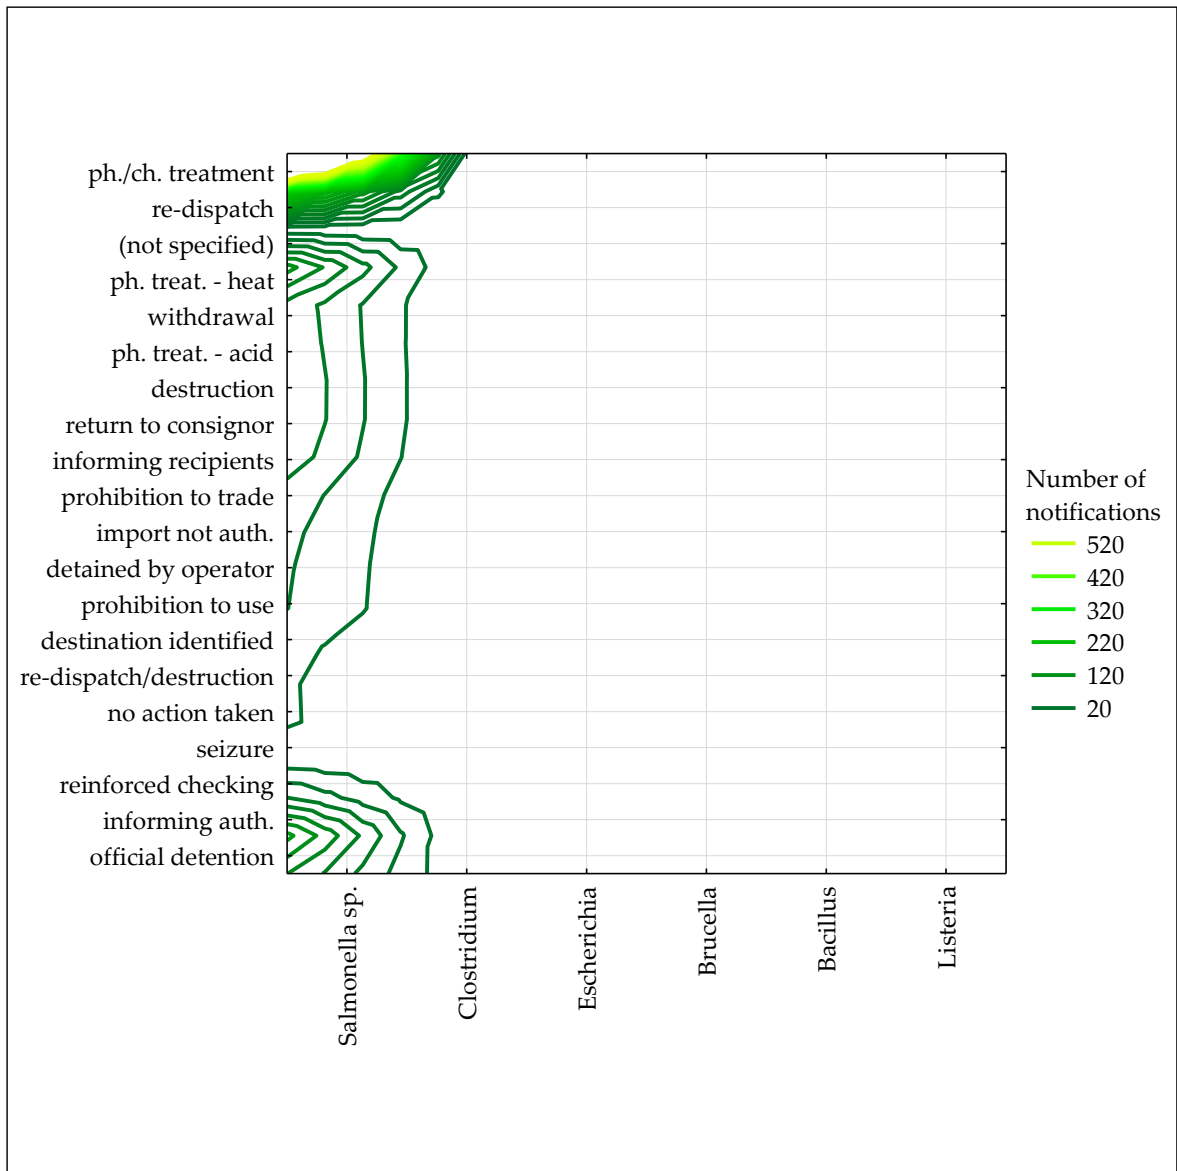

**Figure S36.** Similarities of RASFF notifications on pathogenic microorganisms and action taken within feed using two-way joining.

destination identified – destination of the product identified

import not auth. – import not authorised

informing auth. – informing authorities

ph. treat. - acid – physical treatment - acid treatment

ph. treat. - heat – physical treatment - heat treatment

ph./ch. treatment – physical/chemical treatment

prohibition to trade – prohibition to trade - sales ban

re-dispatch/destruction – re-dispatch or destruction

withdrawal – withdrawal from the market

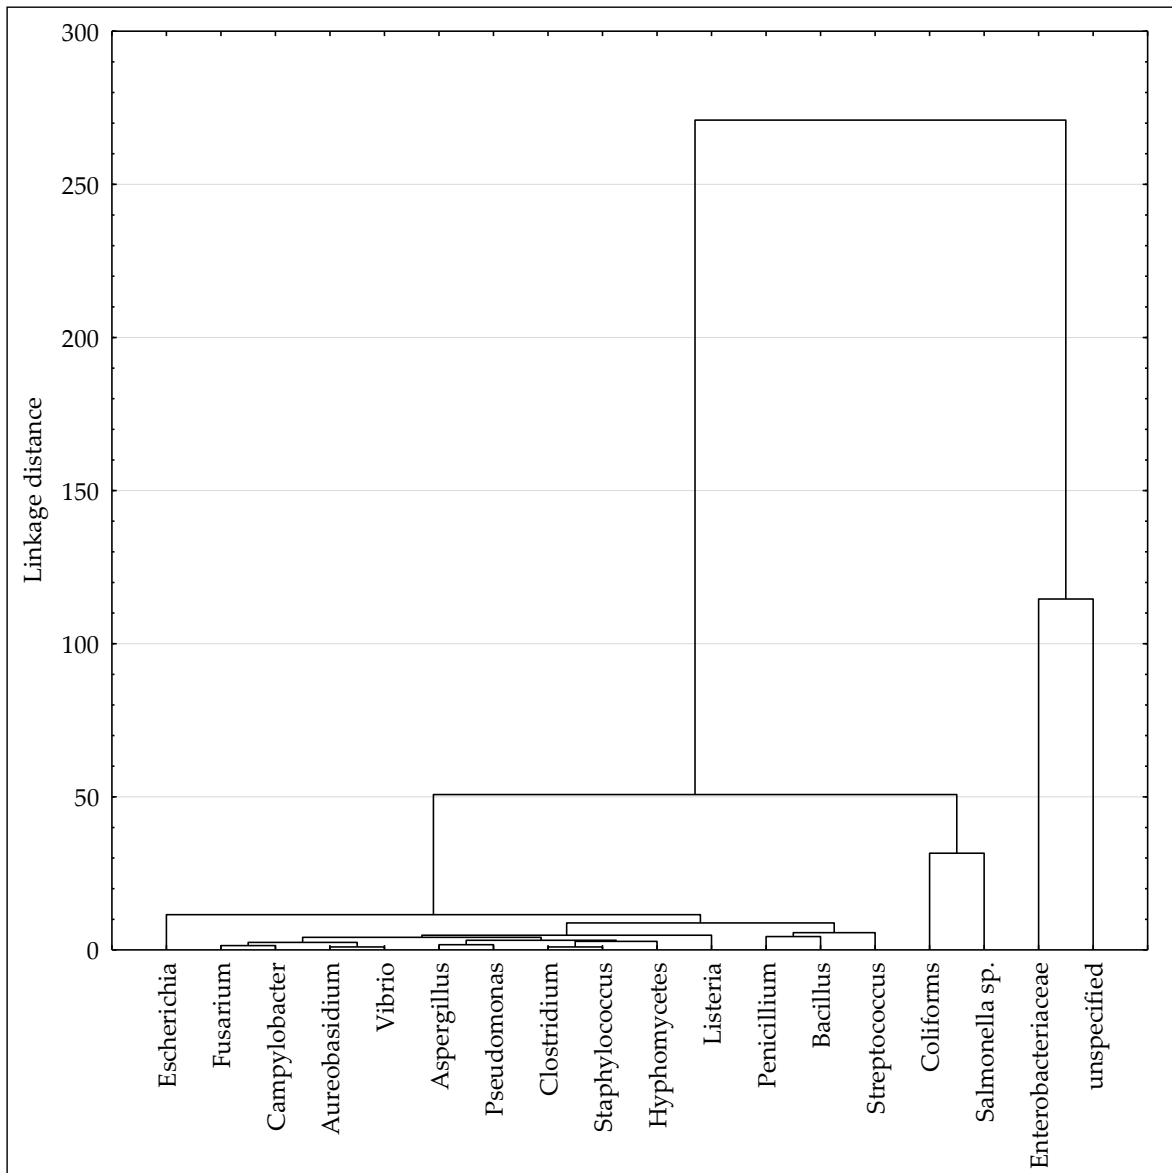

**Figure S37.** Similarities of RASFF notifications on non-pathogenic microorganisms and year within food using joining.

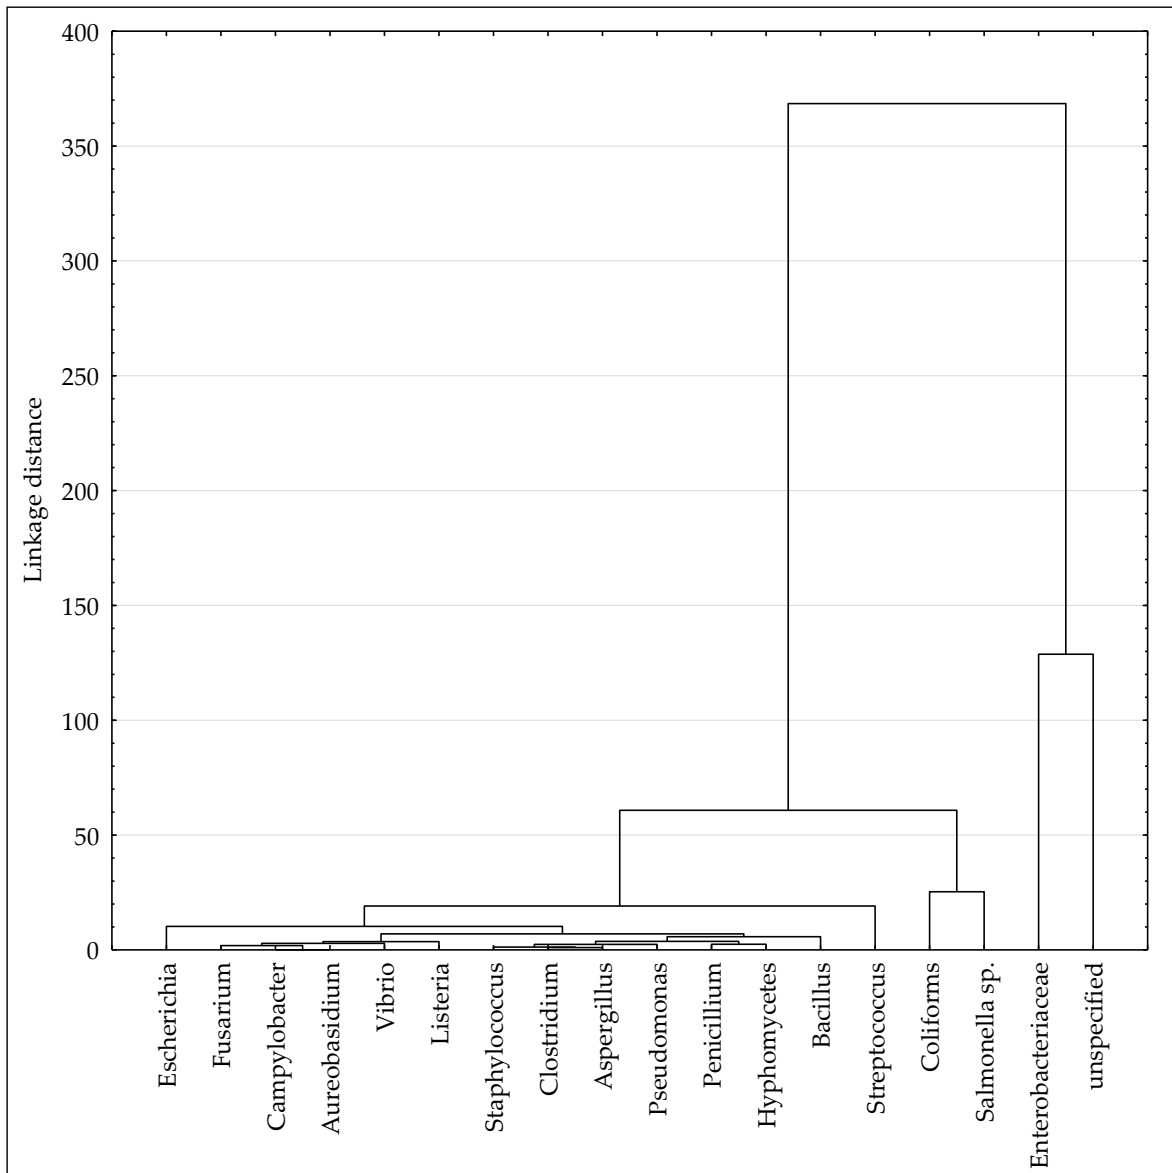

**Figure S38.** Similarities of RASFF notifications on non-pathogenic microorganisms and product category within food using joining.

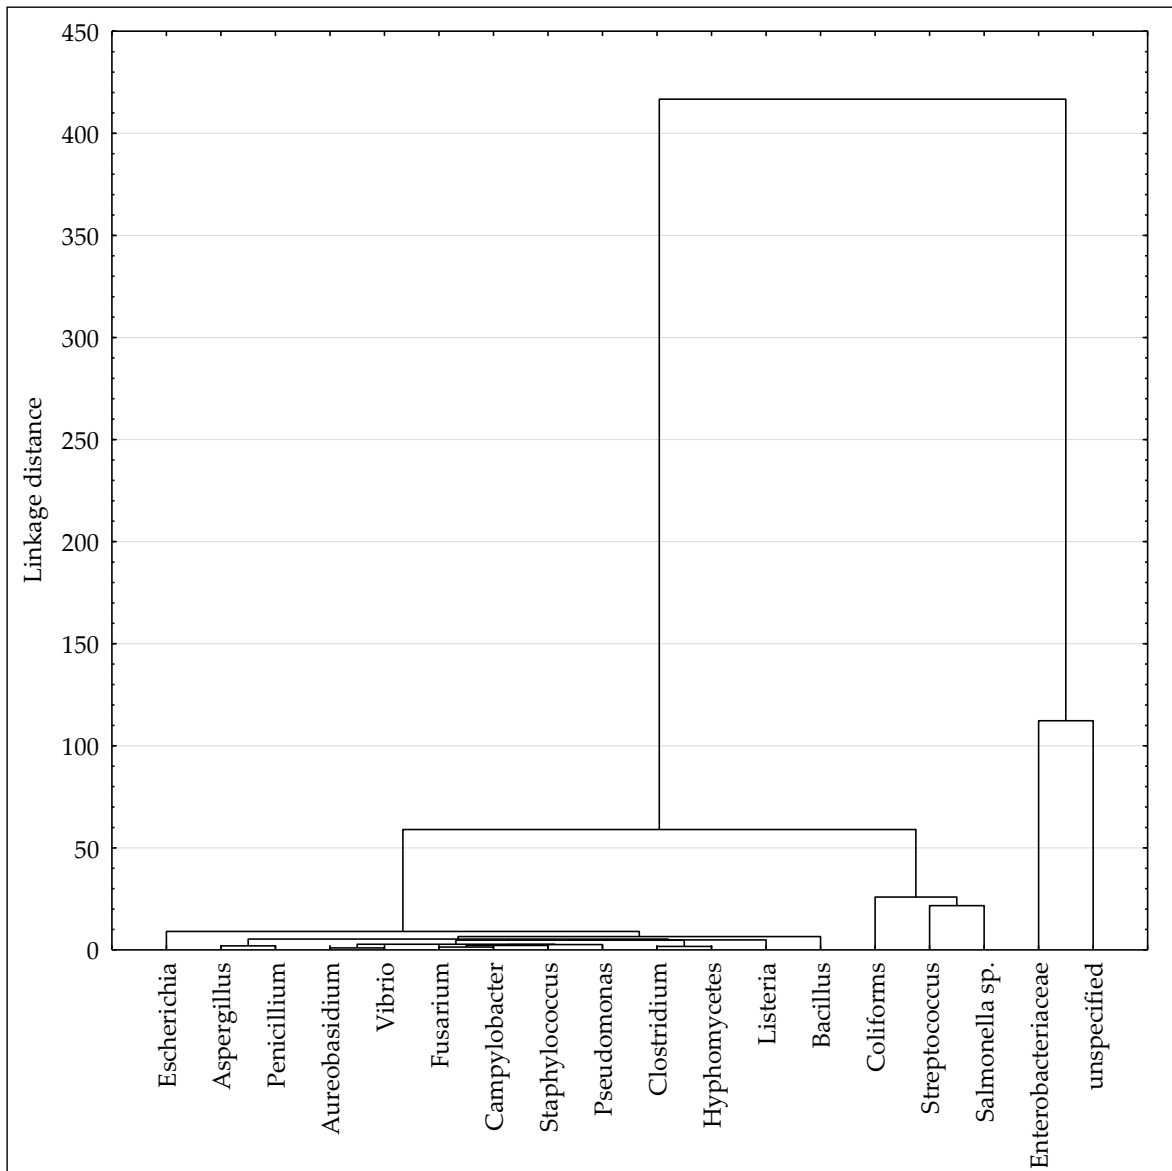

**Figure S39.** Similarities of RASFF notifications on non-pathogenic microorganisms and notifying country within food using joining.

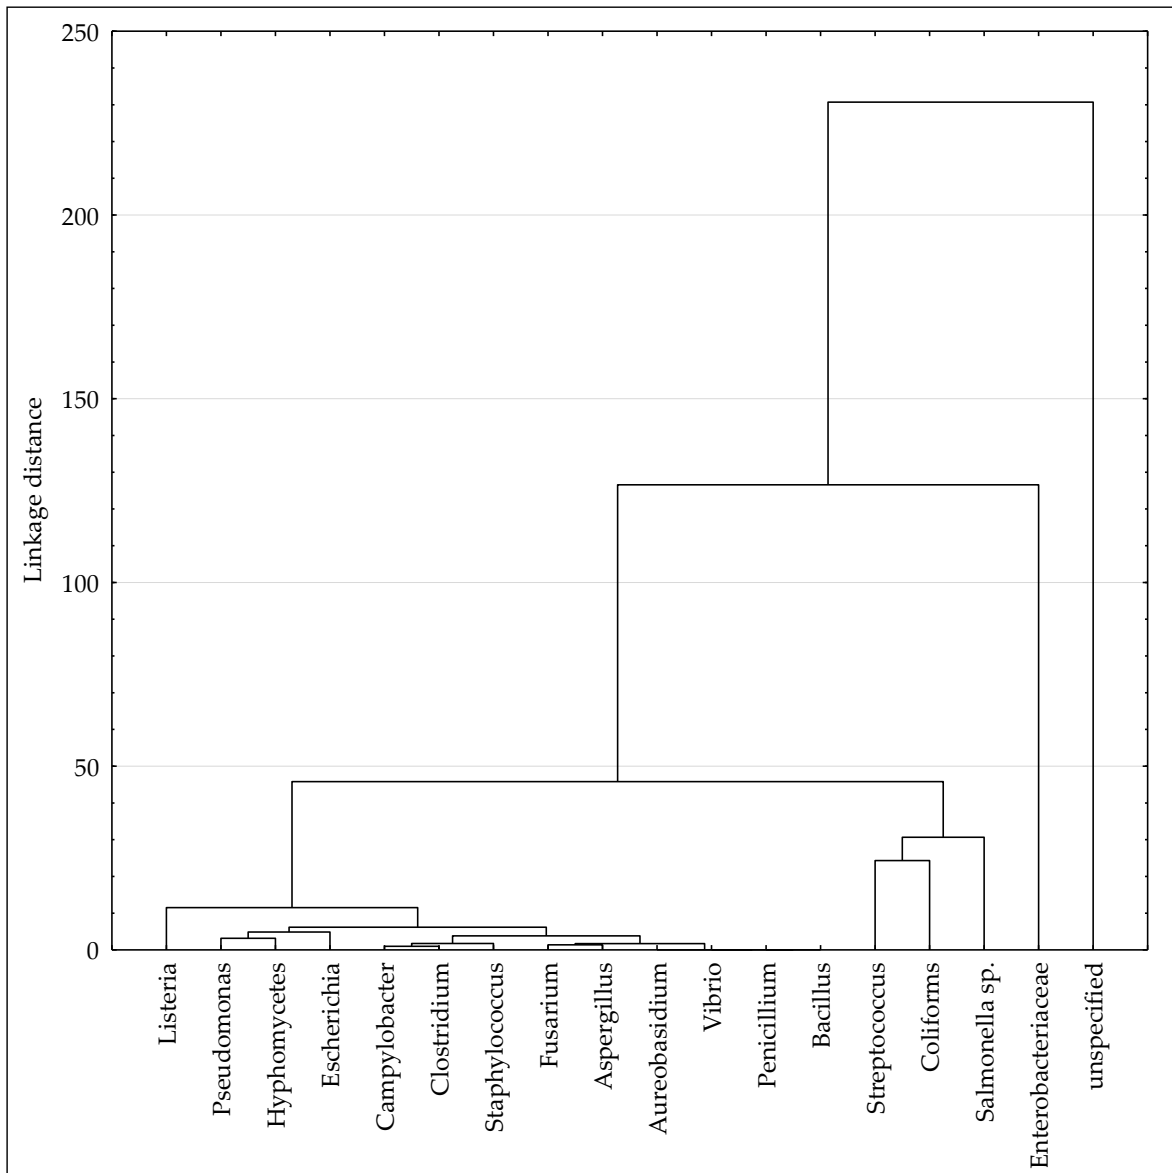

**Figure S40.** Similarities of RASFF notifications on non-pathogenic microorganisms and origin country within food using joining.



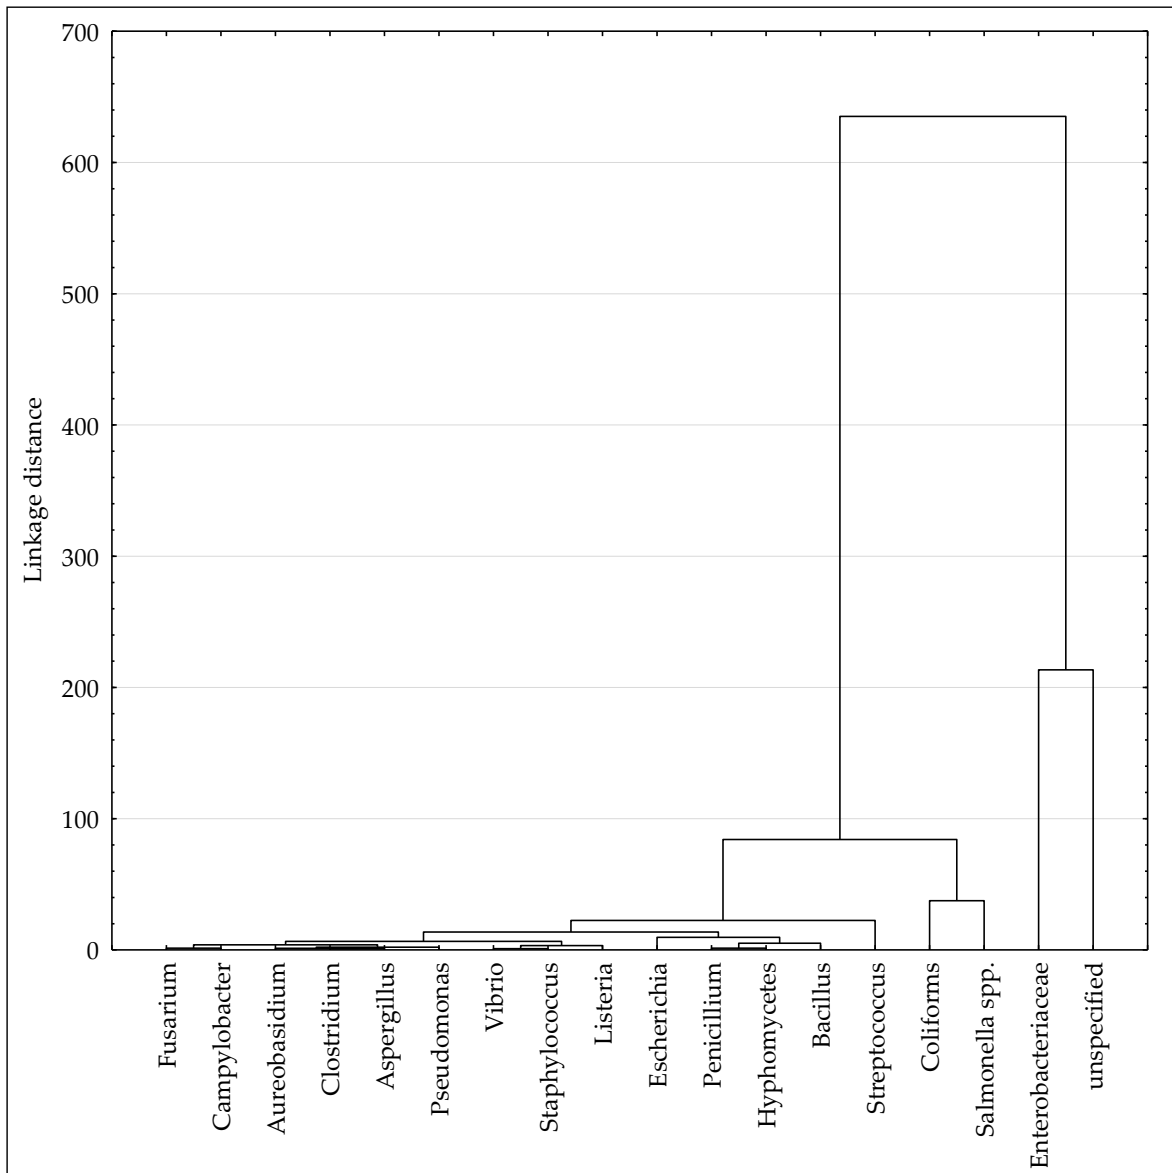

**Figure S41.** Similarities of RASFF notifications on non-pathogenic microorganisms and notification basis within food using joining.

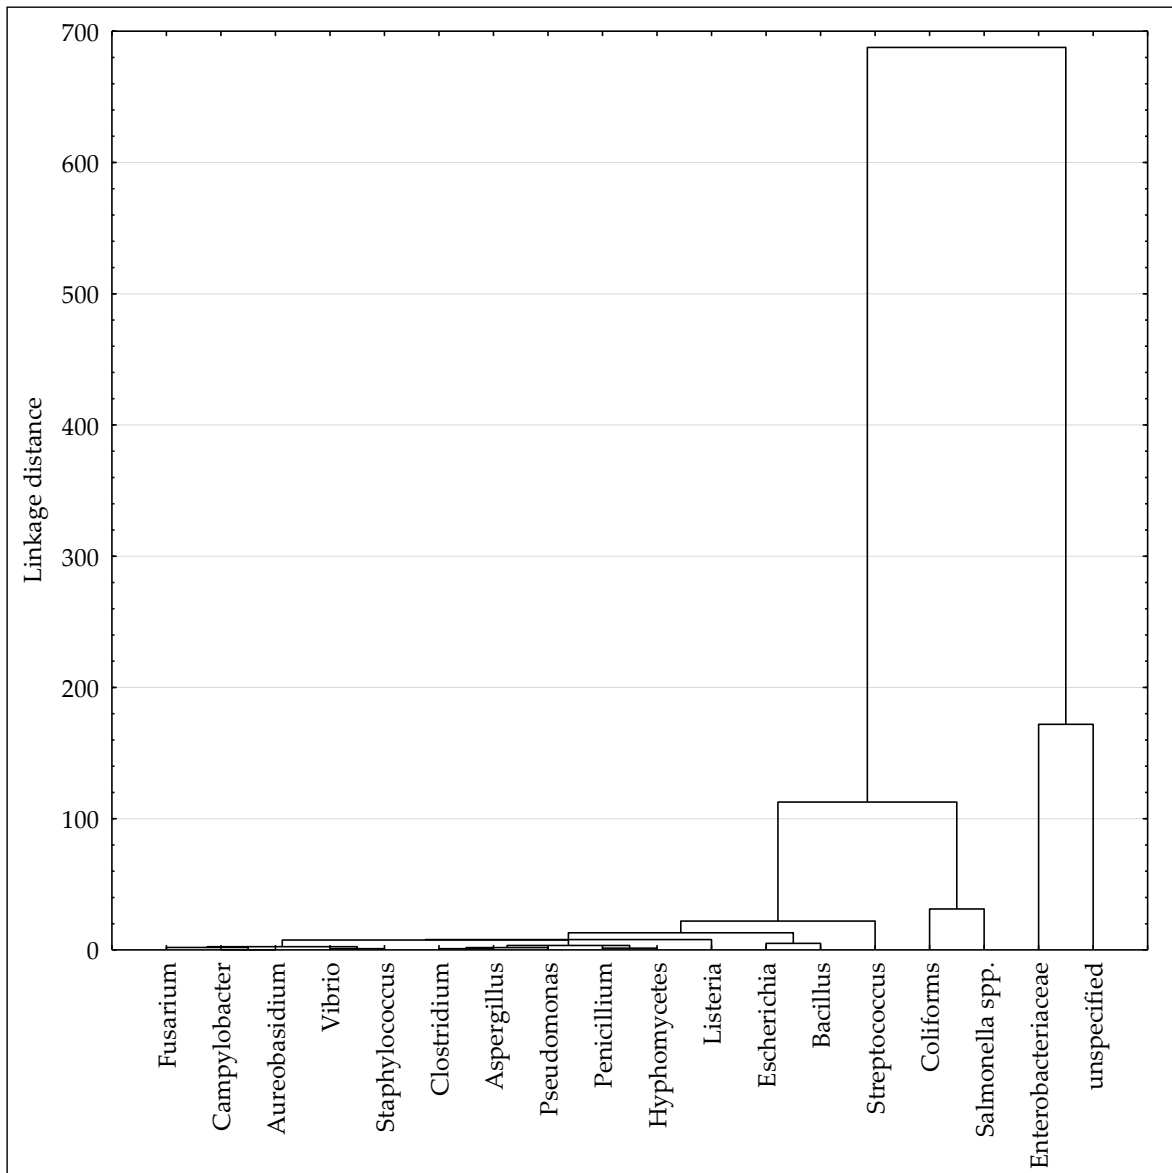

**Figure S42.** Similarities of RASFF notifications on non-pathogenic microorganisms and notification type within food using joining.

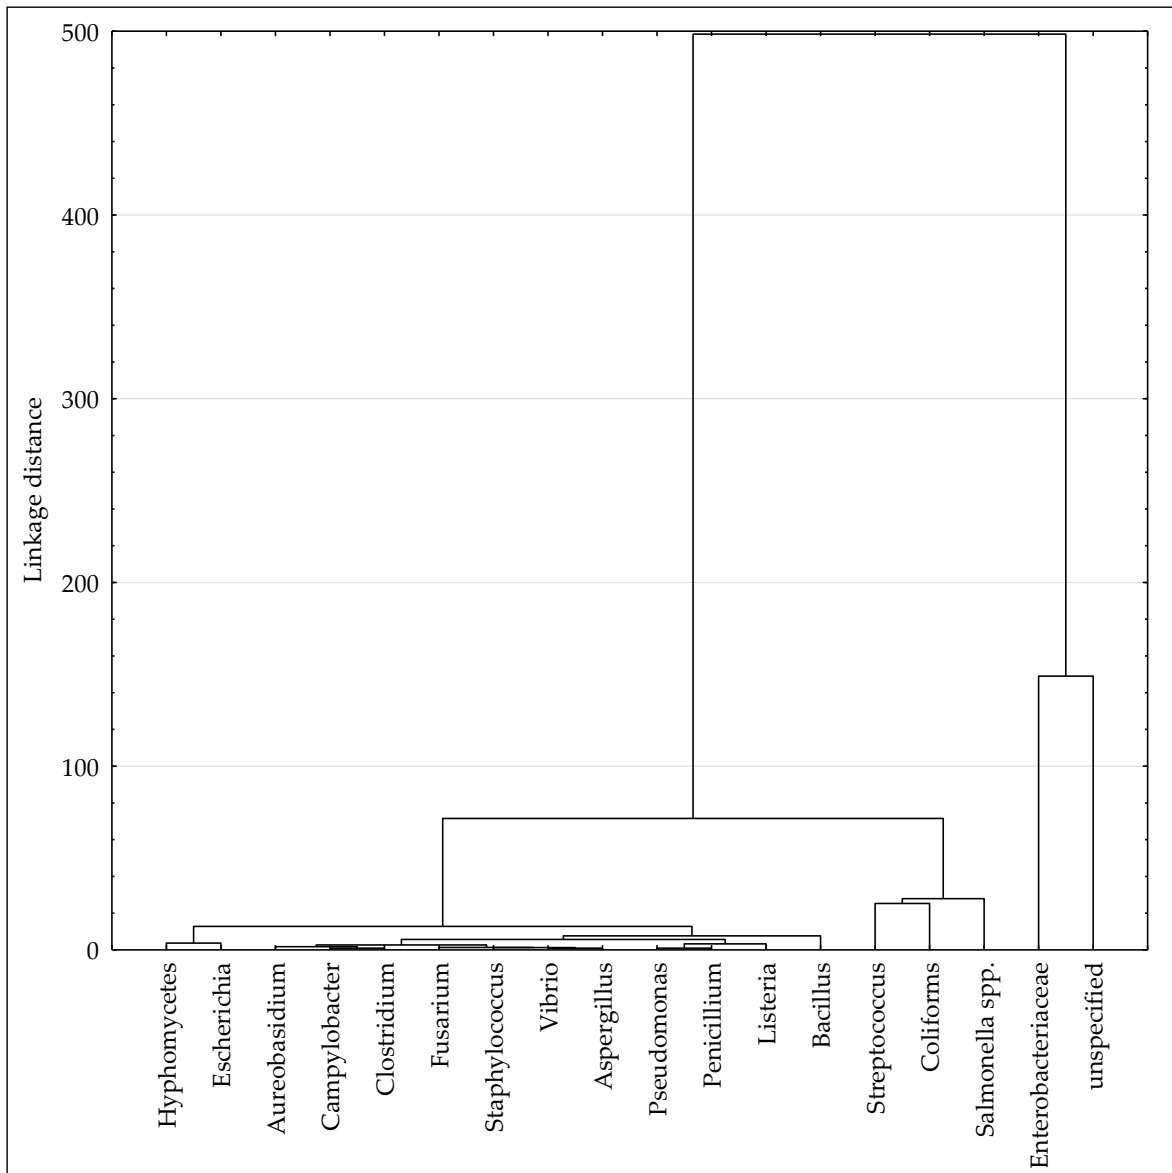

**Figure S43.** Similarities of RASFF notifications on non-pathogenic microorganisms and distribution status within food using joining.

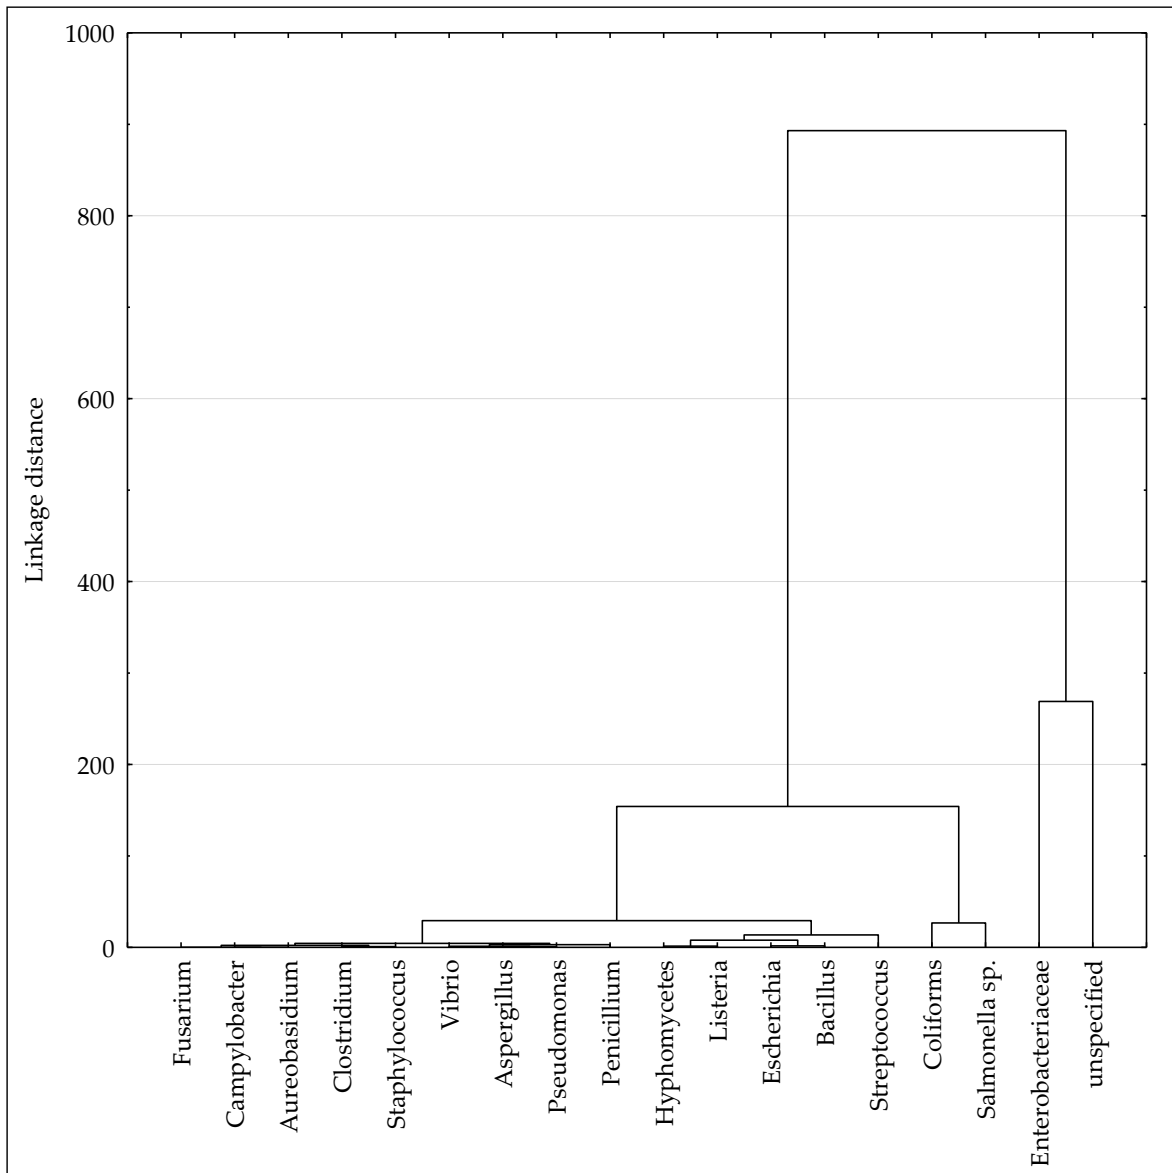

**Figure S44.** Similarities of RASFF notifications on non-pathogenic microorganisms and risk decision within food using joining.

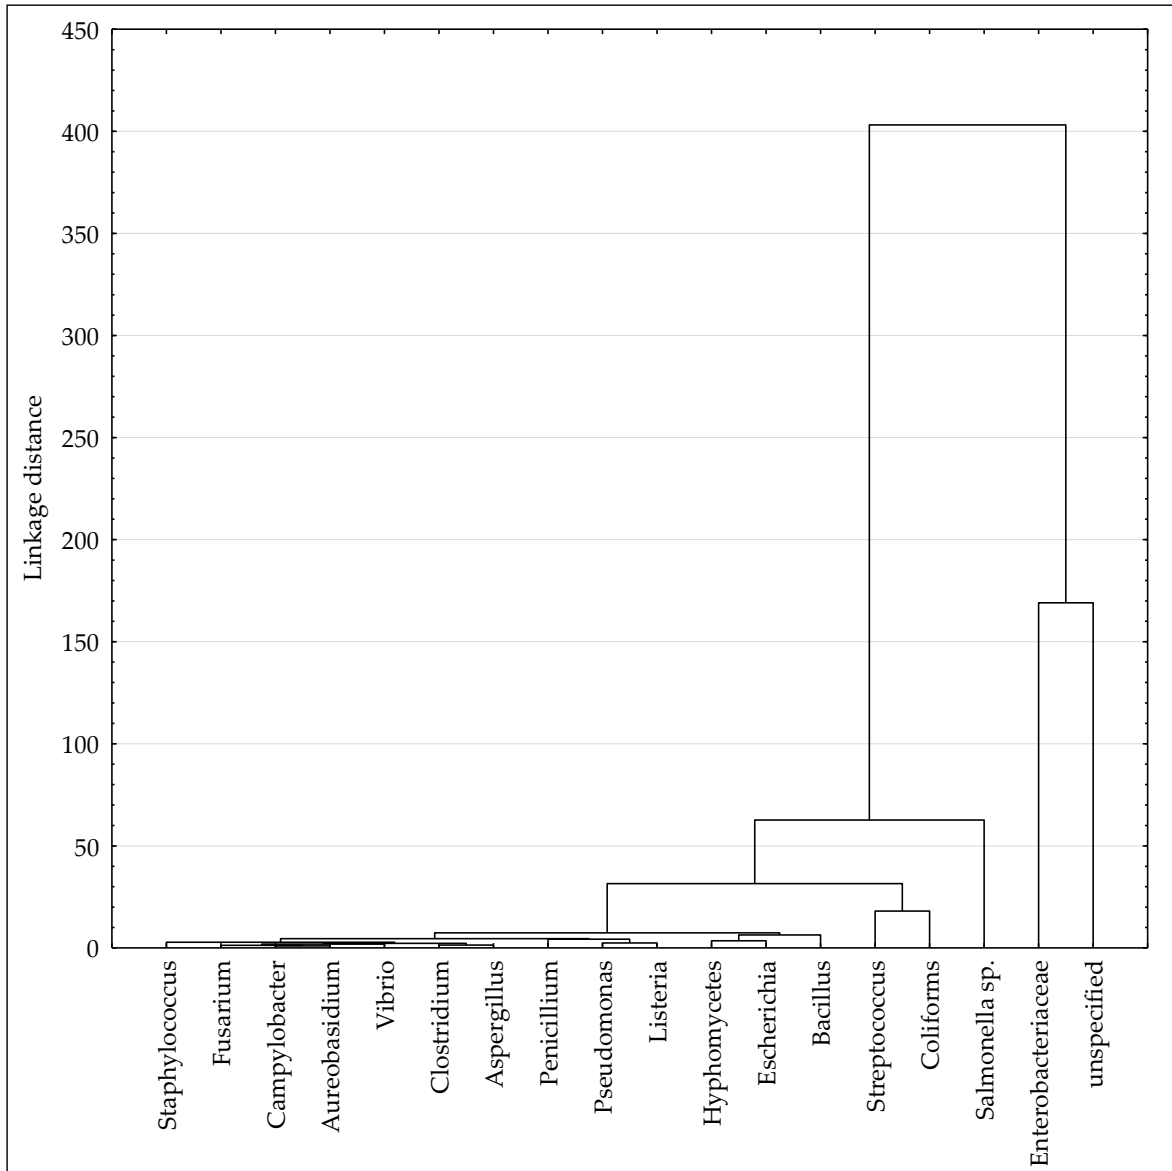

**Figure S45.** Similarities of RASFF notifications on non-pathogenic microorganisms and action taken within food using joining.

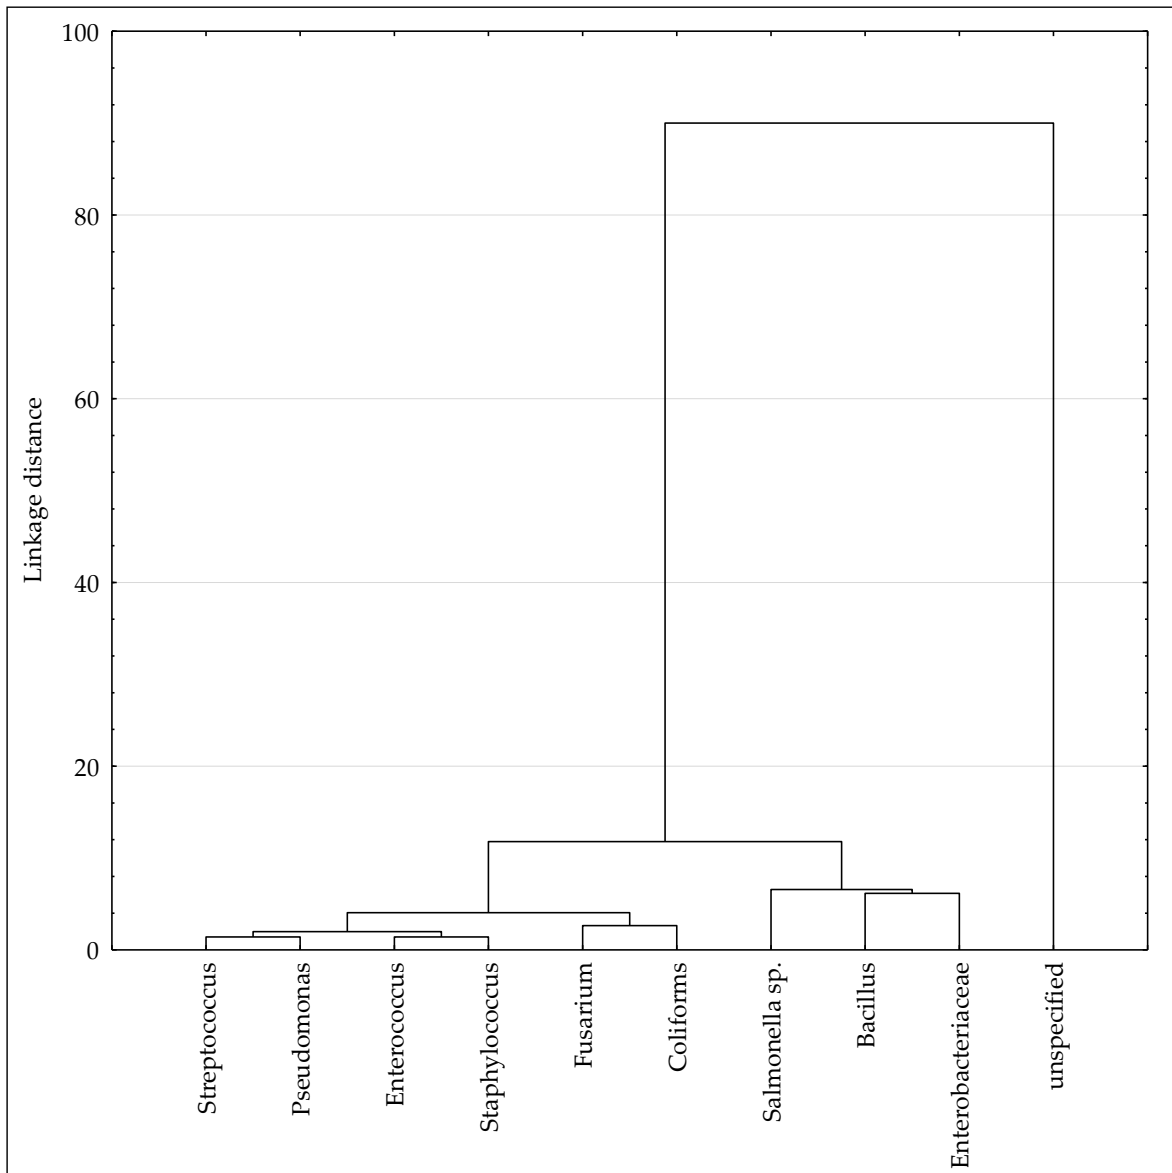

**Figure S46.** Similarities of RASFF notifications on non-pathogenic microorganisms and year within feed using joining.

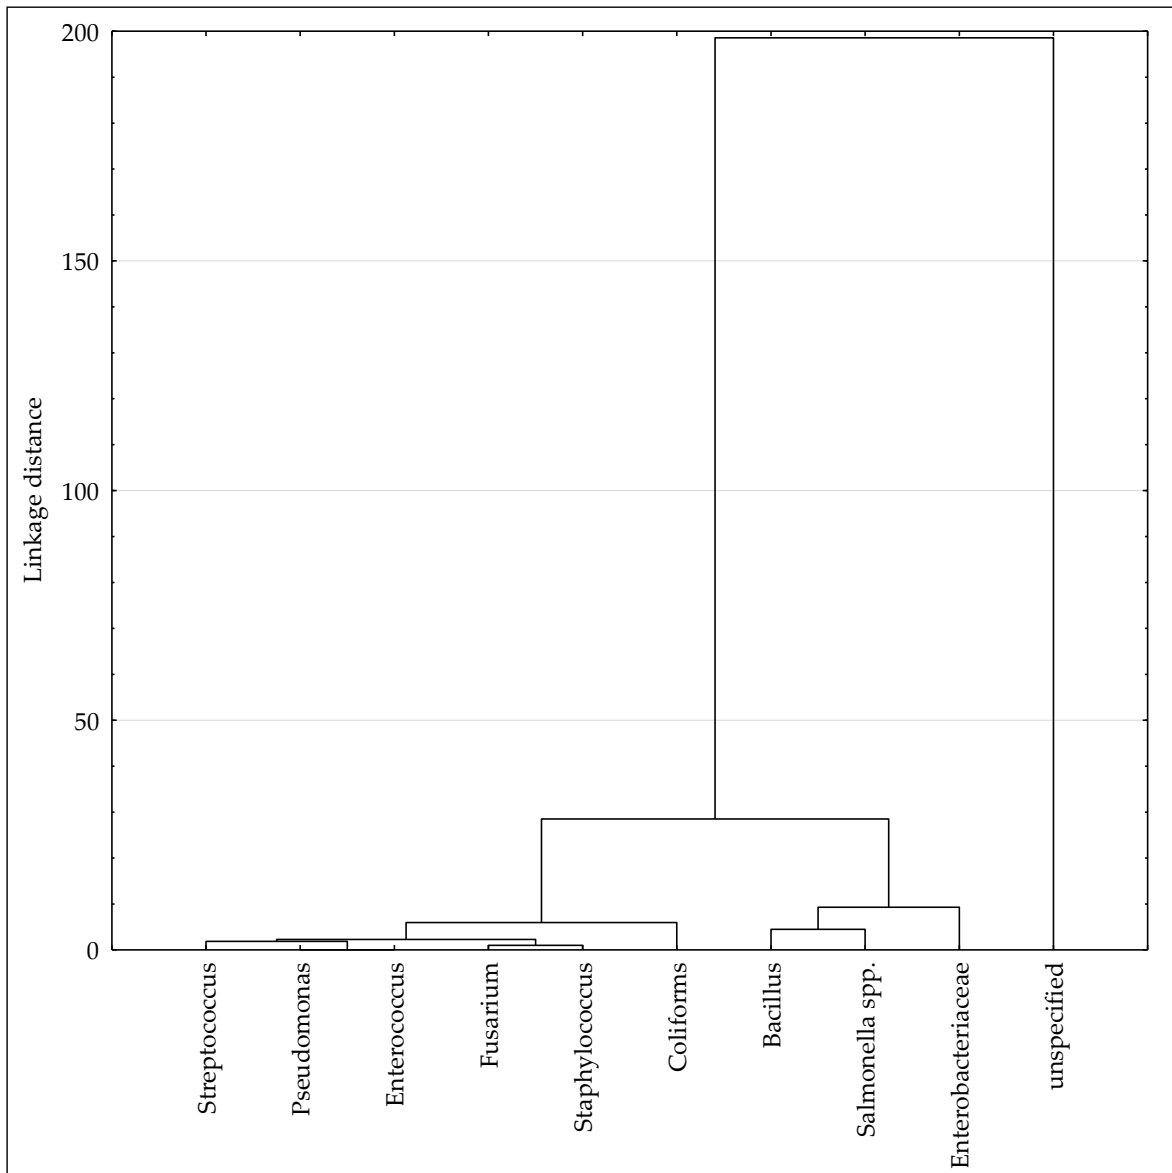

**Figure S47.** Similarities of RASFF notifications on non-pathogenic microorganisms and product category within feed using joining.

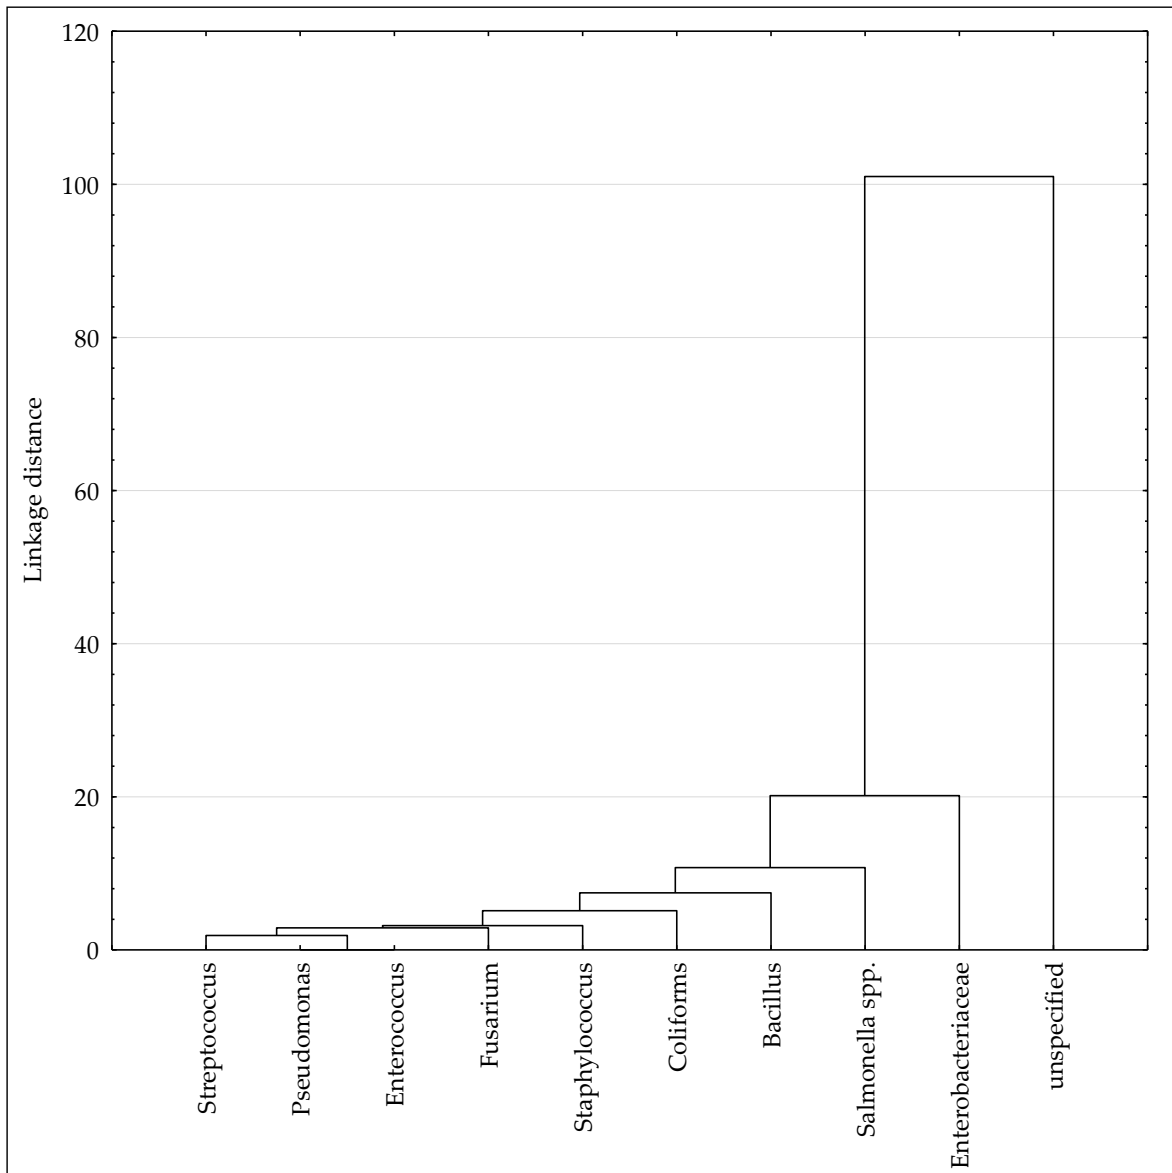

**Figure S48.** Similarities of RASFF notifications on non-pathogenic microorganisms and notifying country within feed using joining.



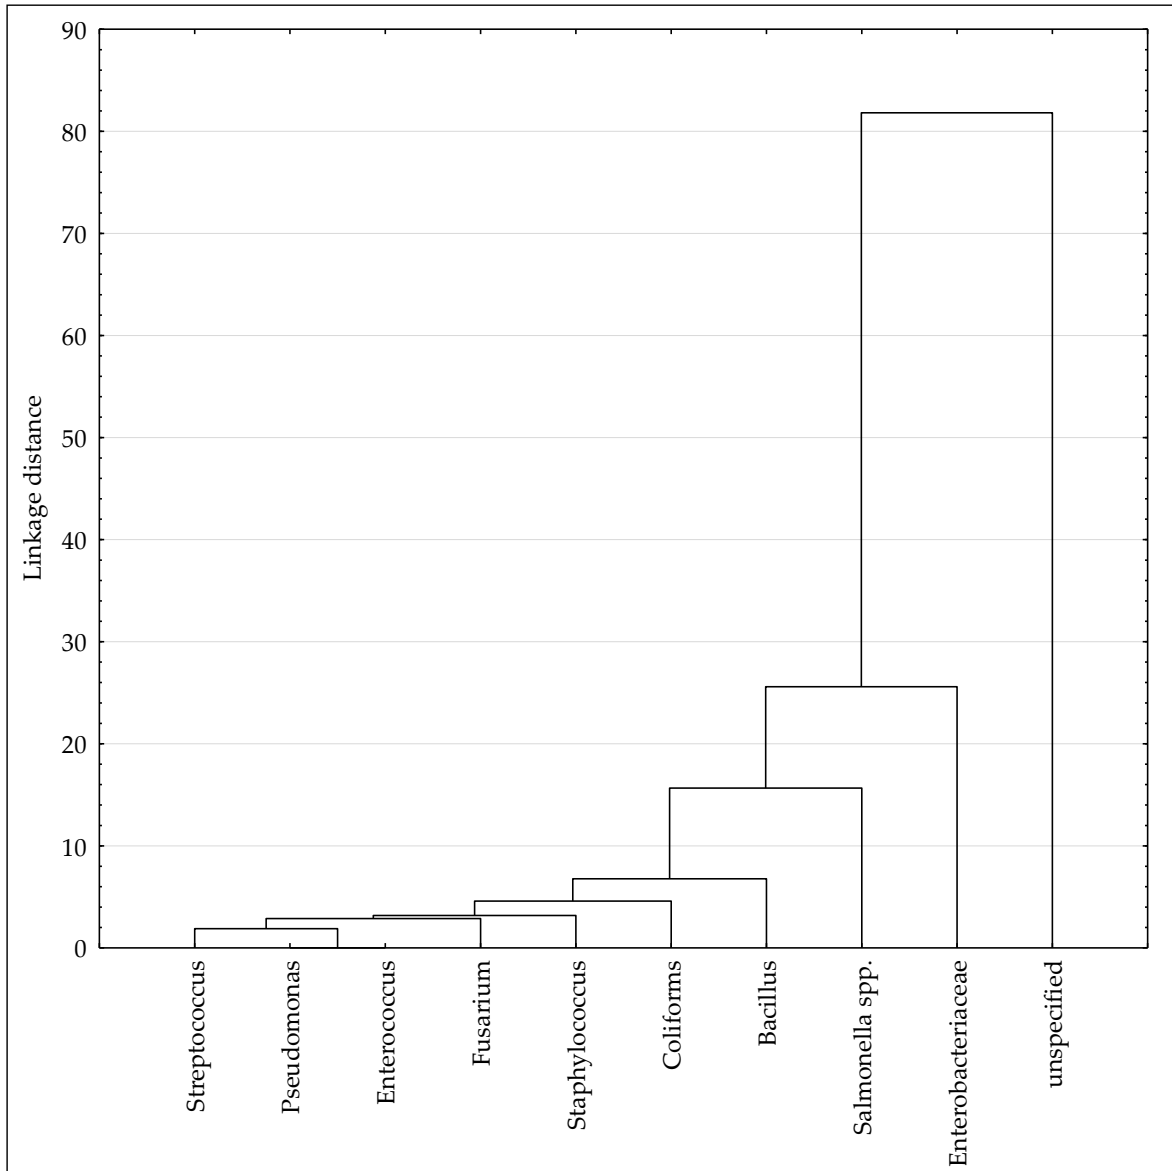

**Figure S49.** Similarities of RASFF notifications on non-pathogenic microorganisms and origin country within feed using joining.

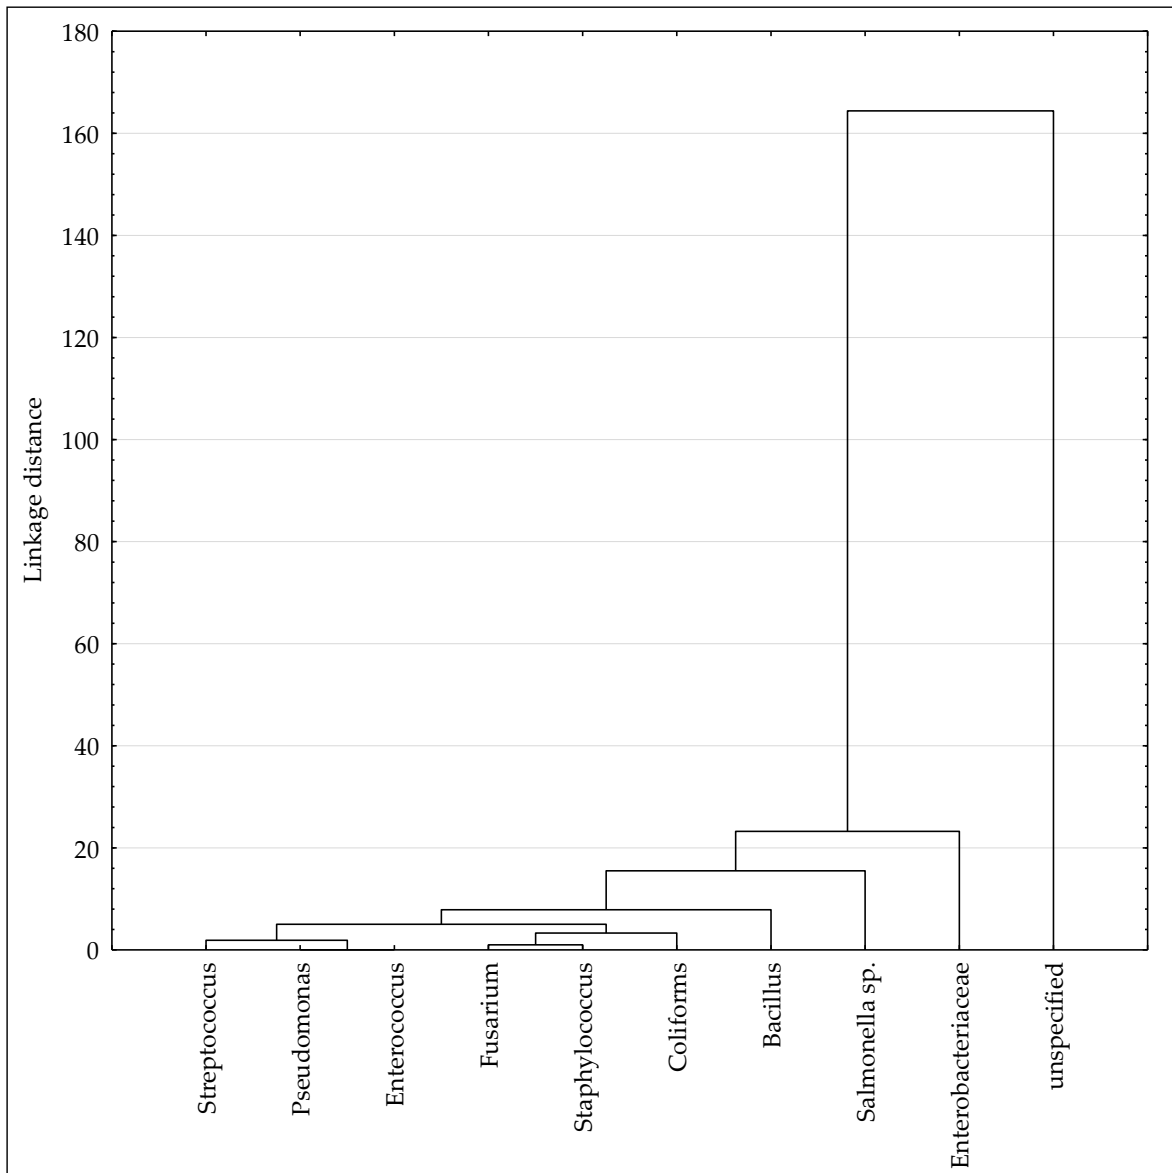

**Figure S50.** Similarities of RASFF notifications on non-pathogenic microorganisms and notification basis within feed using joining.

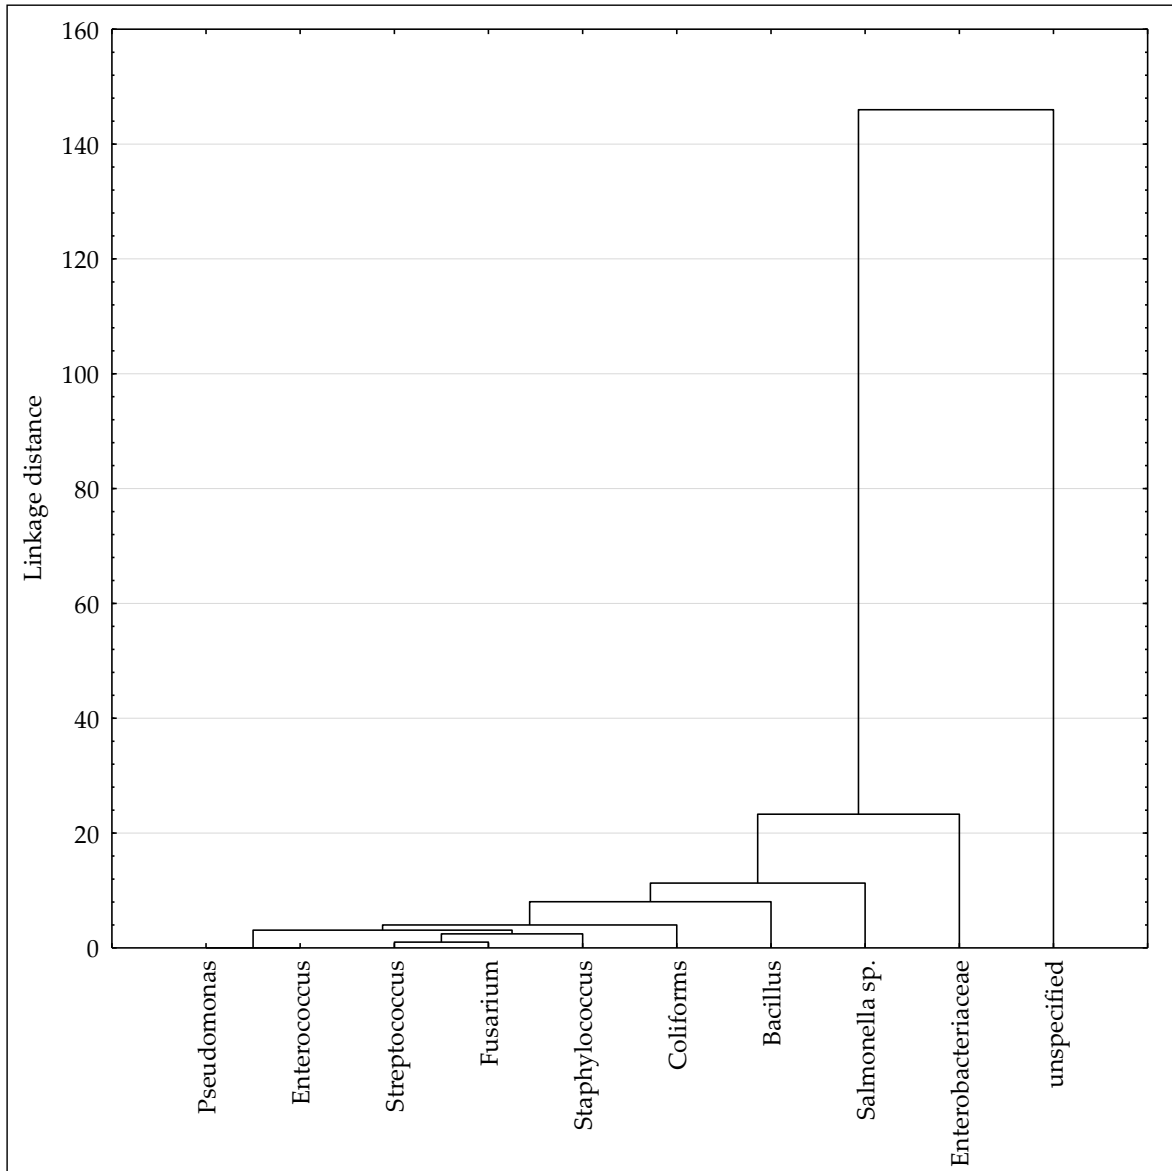

**Figure S51.** Similarities of RASFF notifications on non-pathogenic microorganisms and notification type within feed using joining.

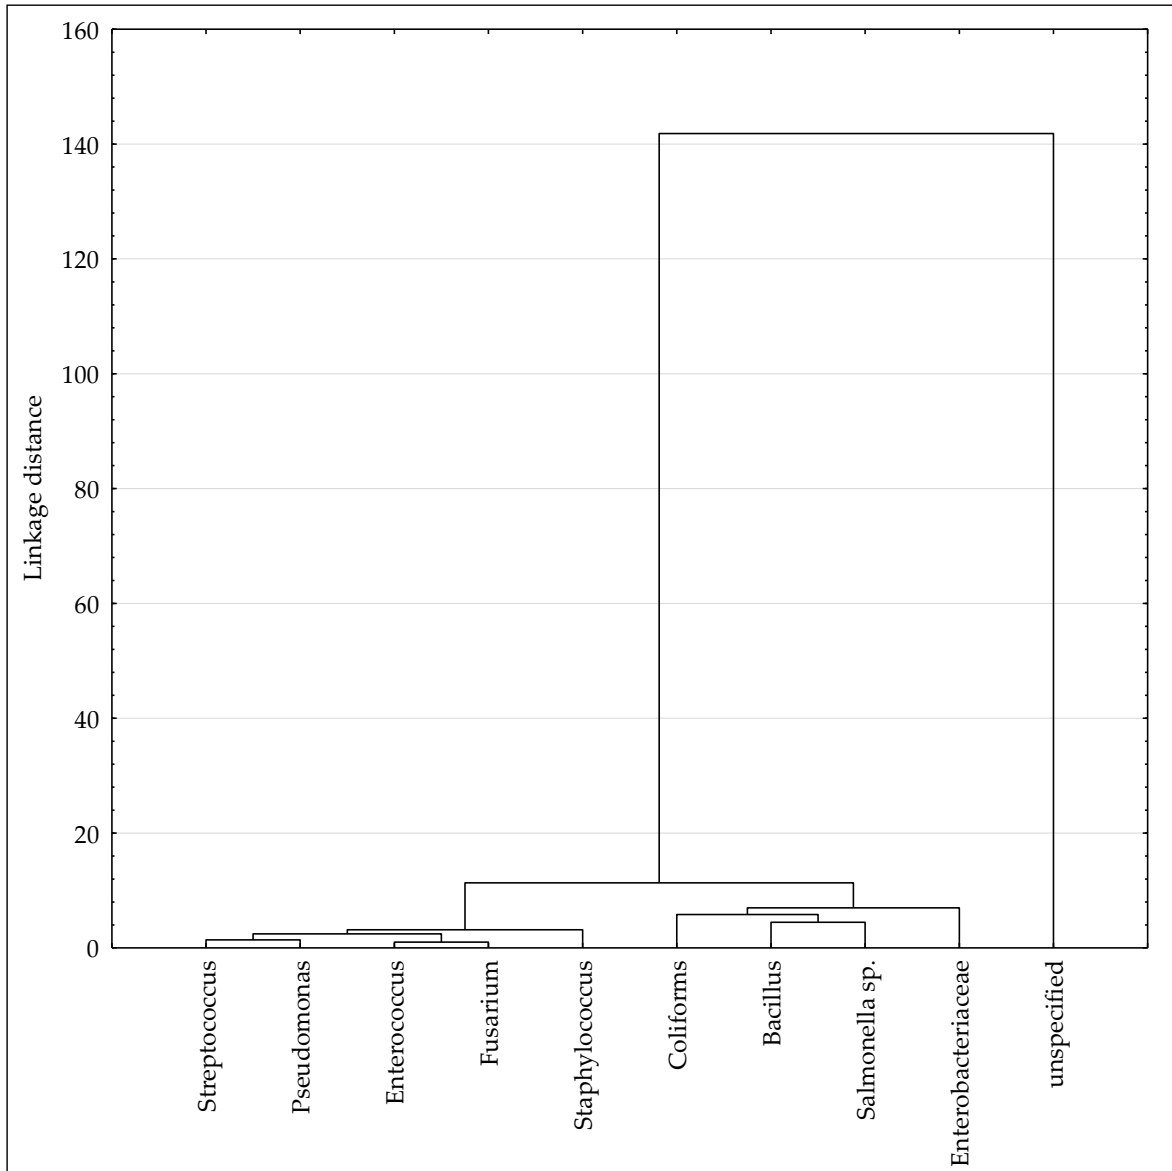

**Figure S52.** Similarities of RASFF notifications on non-pathogenic microorganisms and distribution status within feed using joining.

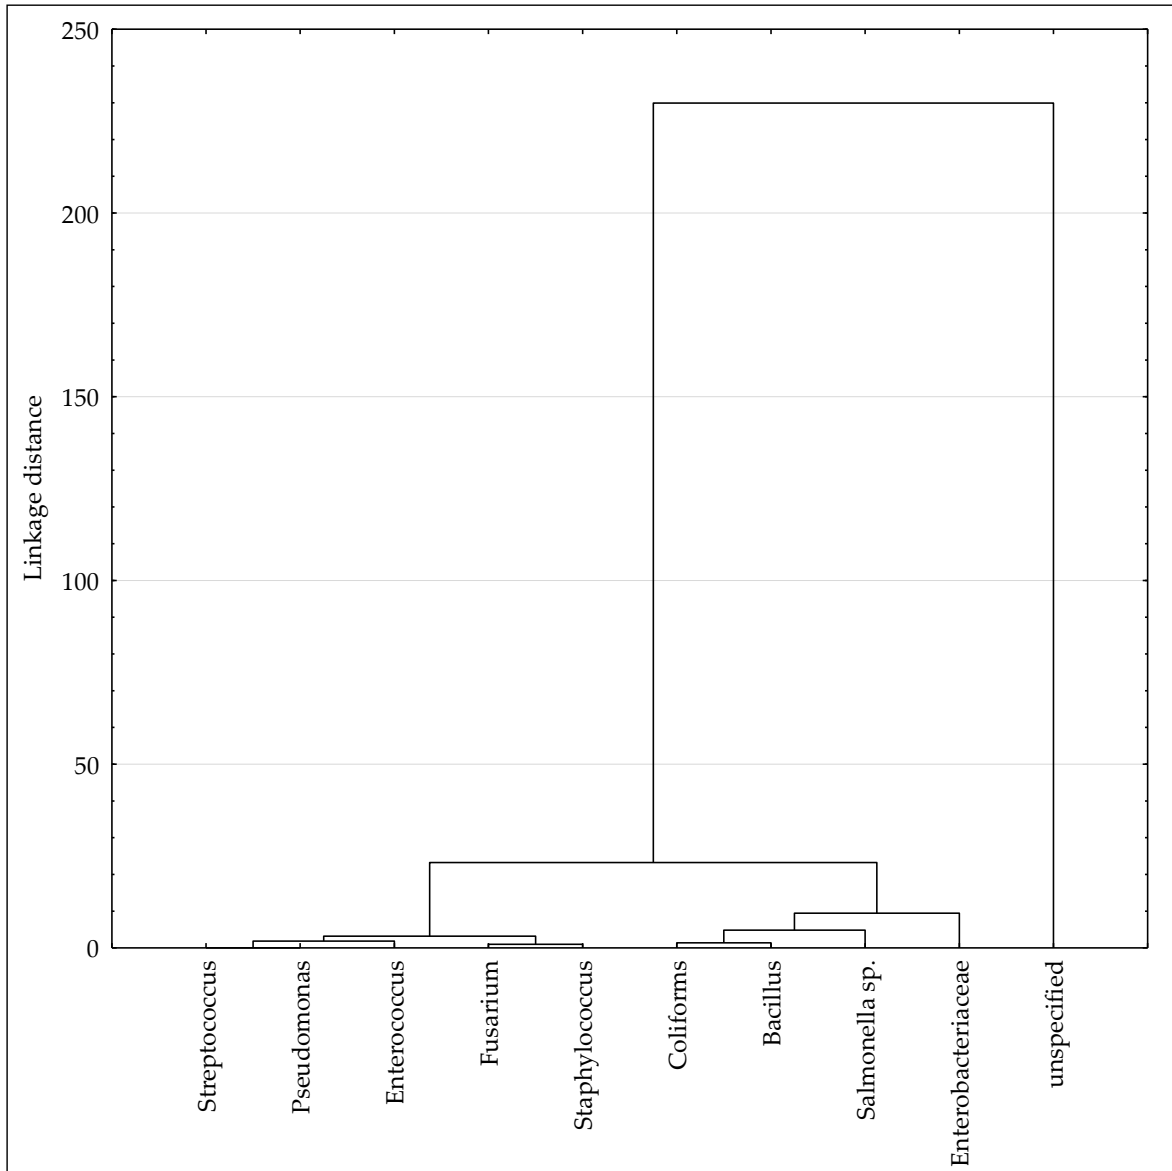

**Figure S53.** Similarities of RASFF notifications on non-pathogenic microorganisms and risk decision within feed using joining.

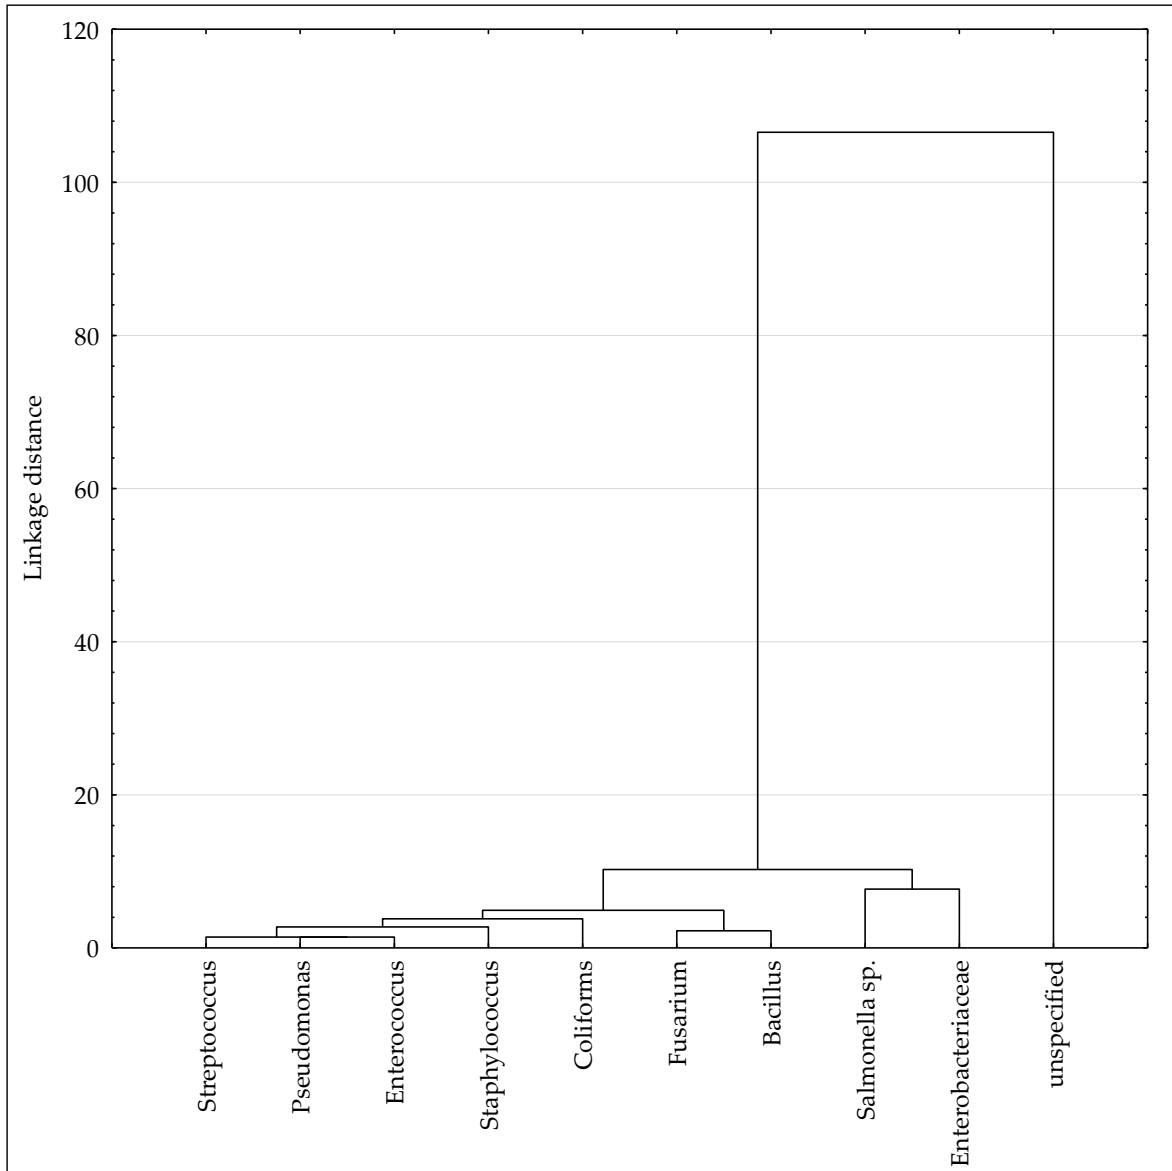

**Figure S54.** Similarities of RASFF notifications on non-pathogenic microorganisms and action taken within feed using joining.

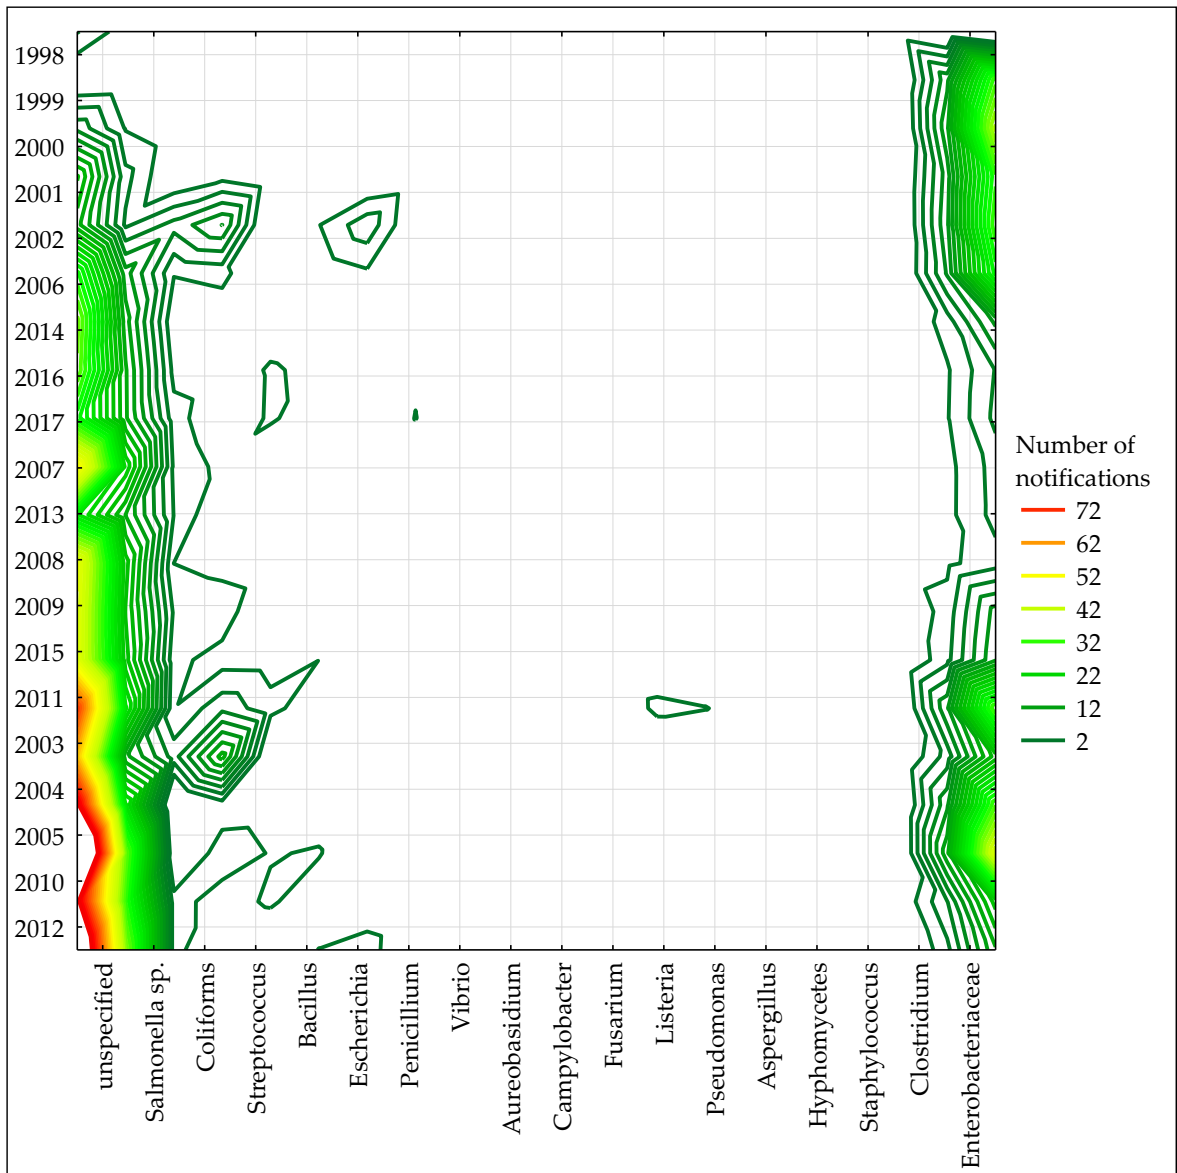

**Figure S55.** Similarities of RASFF notifications on non-pathogenic microorganisms and year within food using two-way joining.

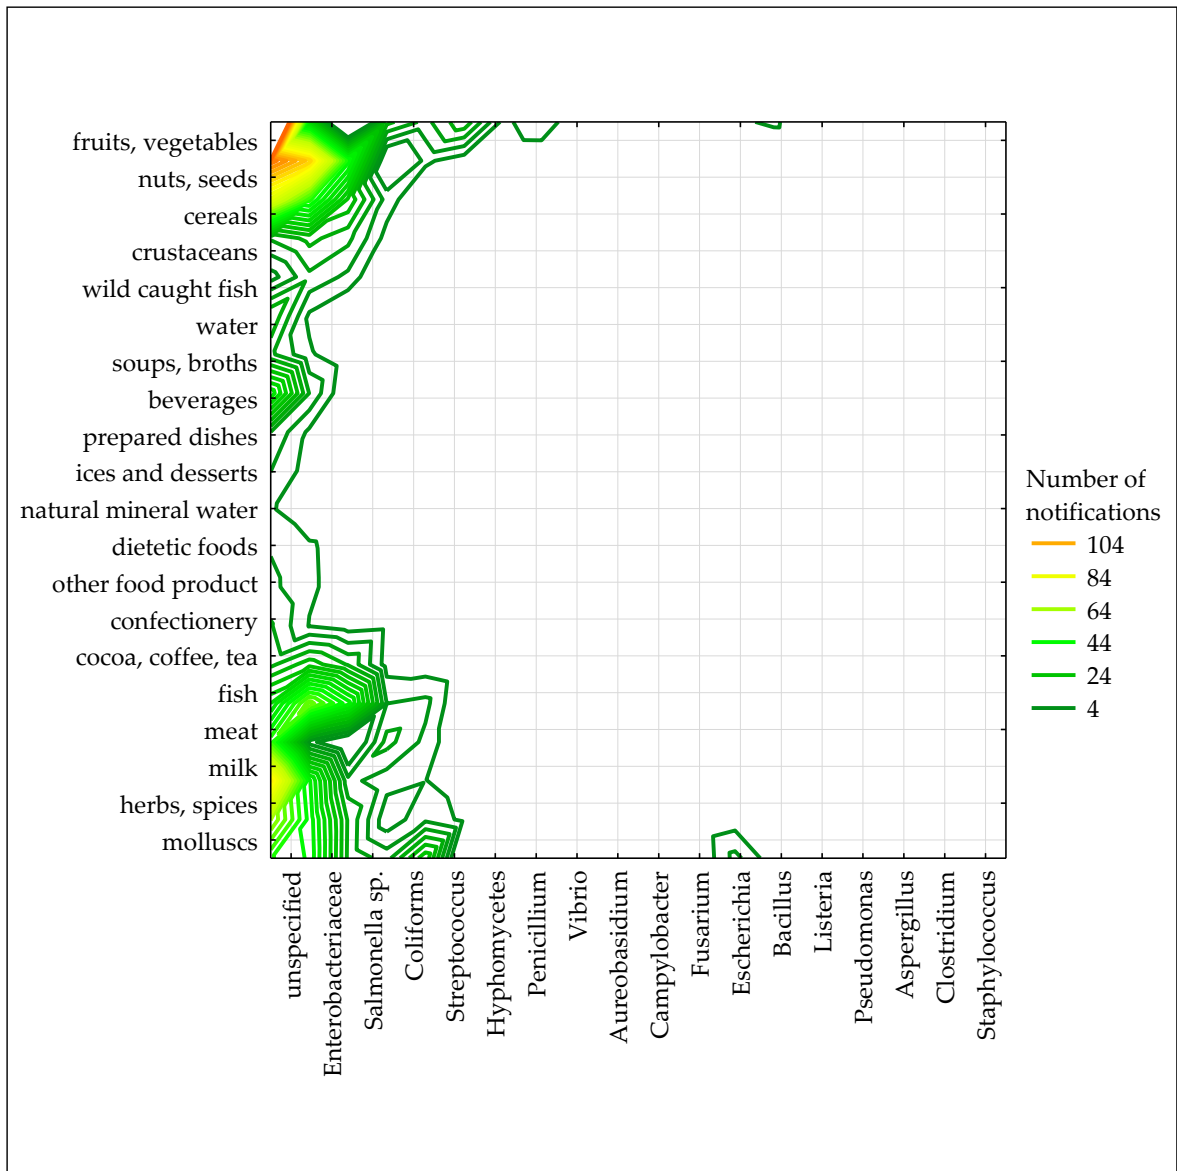

**Figure S56.** Similarities of RASFF notifications on non-pathogenic microorganisms and product category within food using two-way joining.

beverages – non-alcoholic beverages

cereals – cereals and bakery products

cocoa, coffee, tea – cocoa and cocoa preparations, coffee and tea

crustaceans – crustaceans and products thereof

dietetic foods – dietetic foods, food supplements, fortified foods

fish – fish and fish products

herbs, spices – herbs and spices

meat – meat and meat products (other than poultry)

milk – milk and milk products

molluscs – molluscs and products thereof - (obsolete)

nuts, seeds – nuts, nut products and seeds

other food product – other food product / mixed

prepared dishes – prepared dishes and snacks

soups, broths – soups, broths, sauces and condiments

water – water for human consumption (other)

wild caught fish – wild caught fish and products thereof (other than crustaceans and molluscs) - (obsolete)



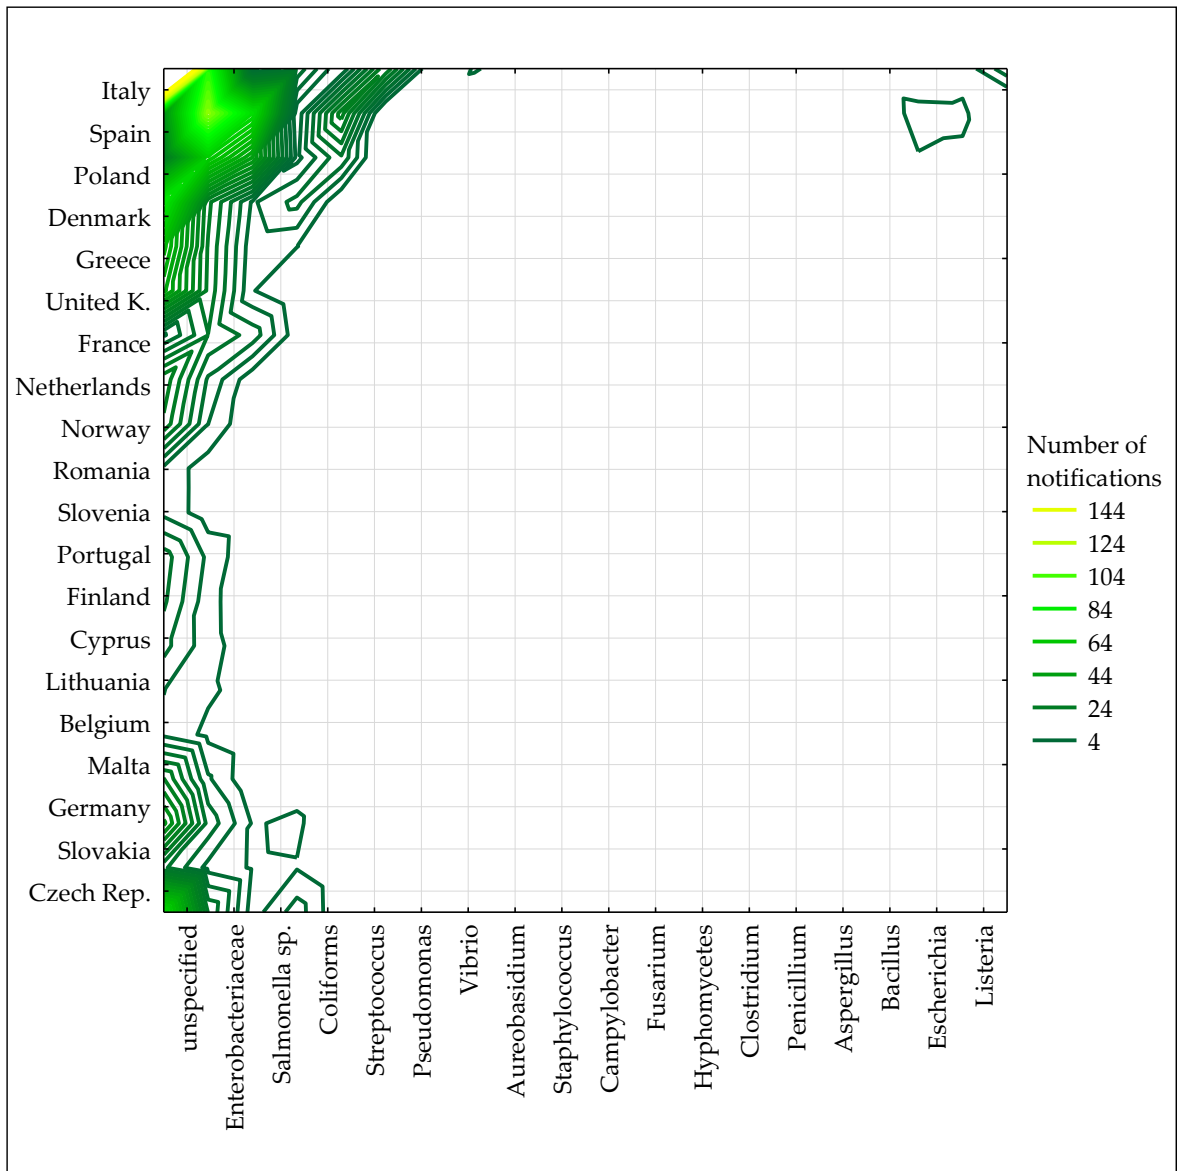

**Figure S57.** Similarities of RASFF notifications on non-pathogenic microorganisms and notifying country within food using two-way joining.

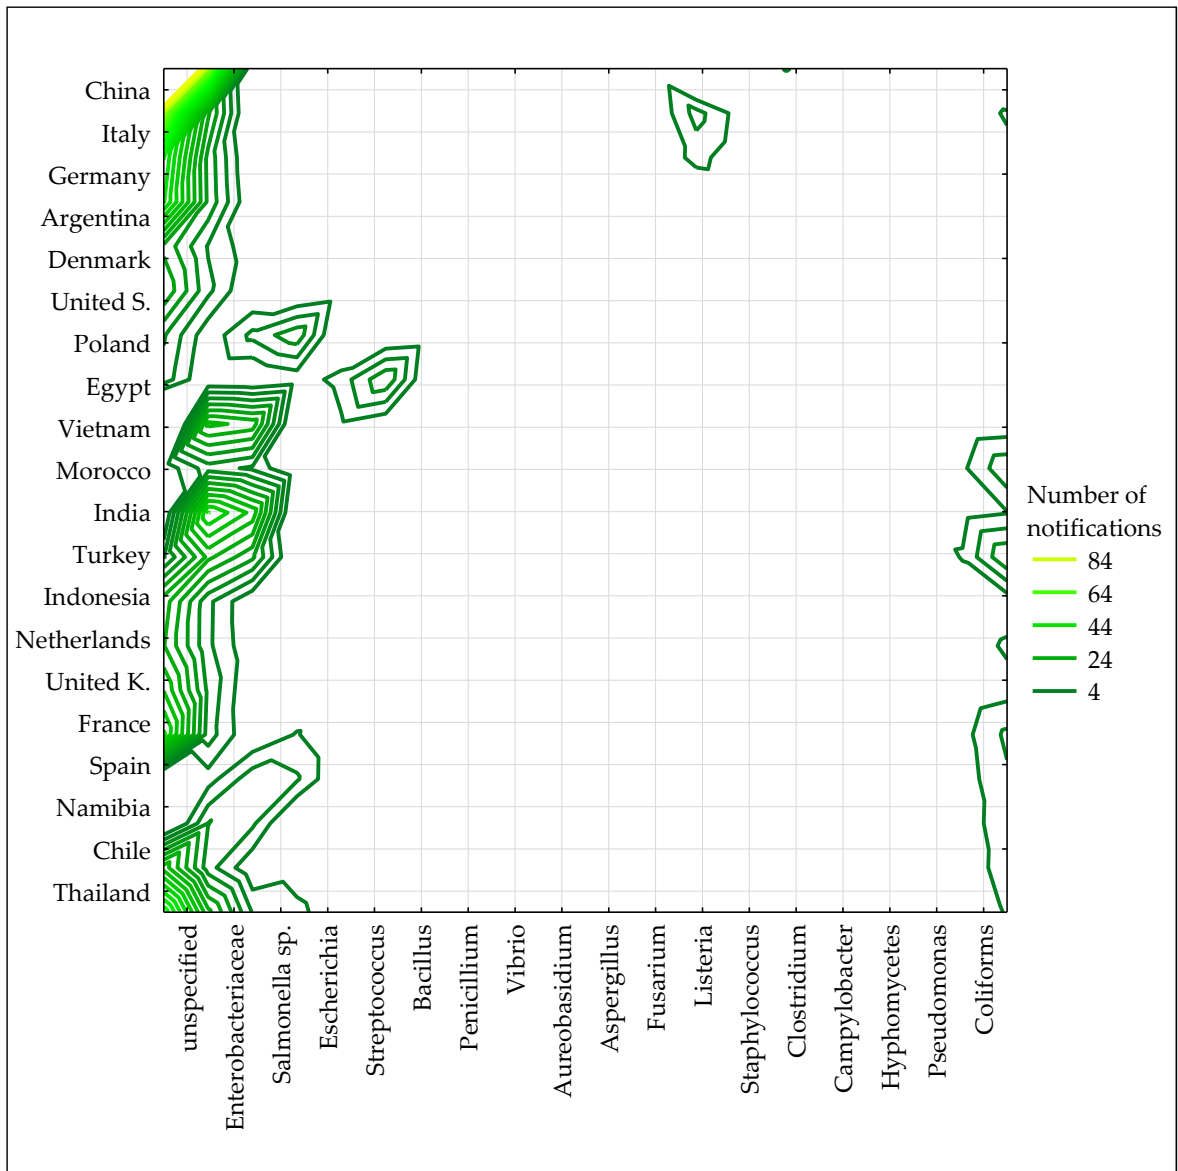

**Figure S58.** Similarities of RASFF notifications on non-pathogenic microorganisms and origin country within food using two-way joining.

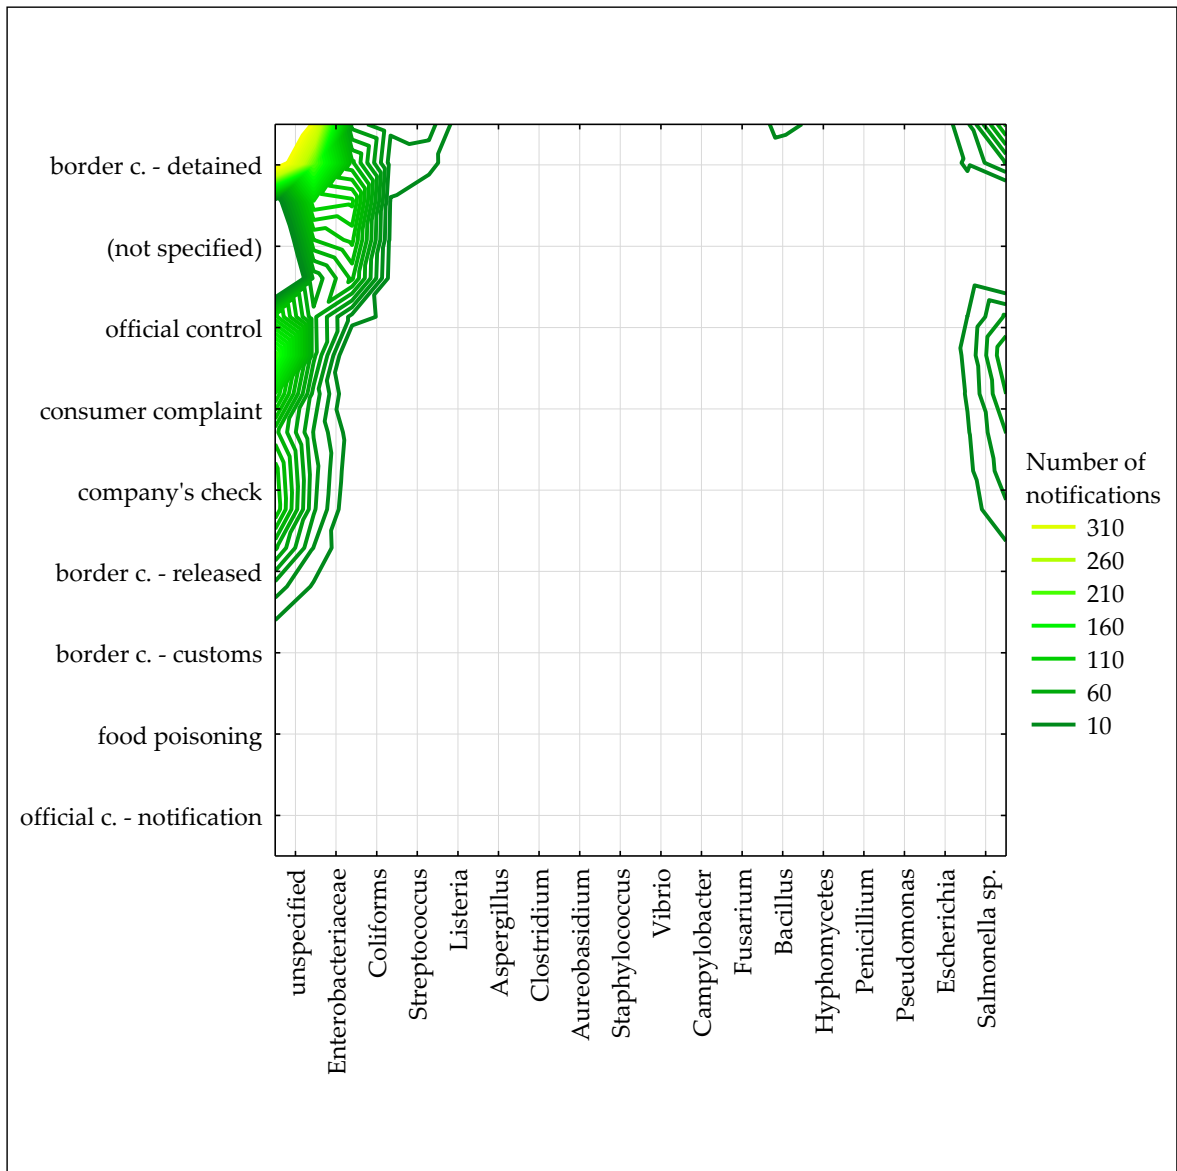

**Figure S59.** Similarities of RASFF notifications on non-pathogenic microorganisms and notification basis within food using two-way joining.

border c. - customs – border control - consignment under customs

border c. - detained – border control - consignment detained

border c. - released – border control - consignment released

company's check – company's own check

official c. - notification – official control following RASFF notification

official control – official control on the market

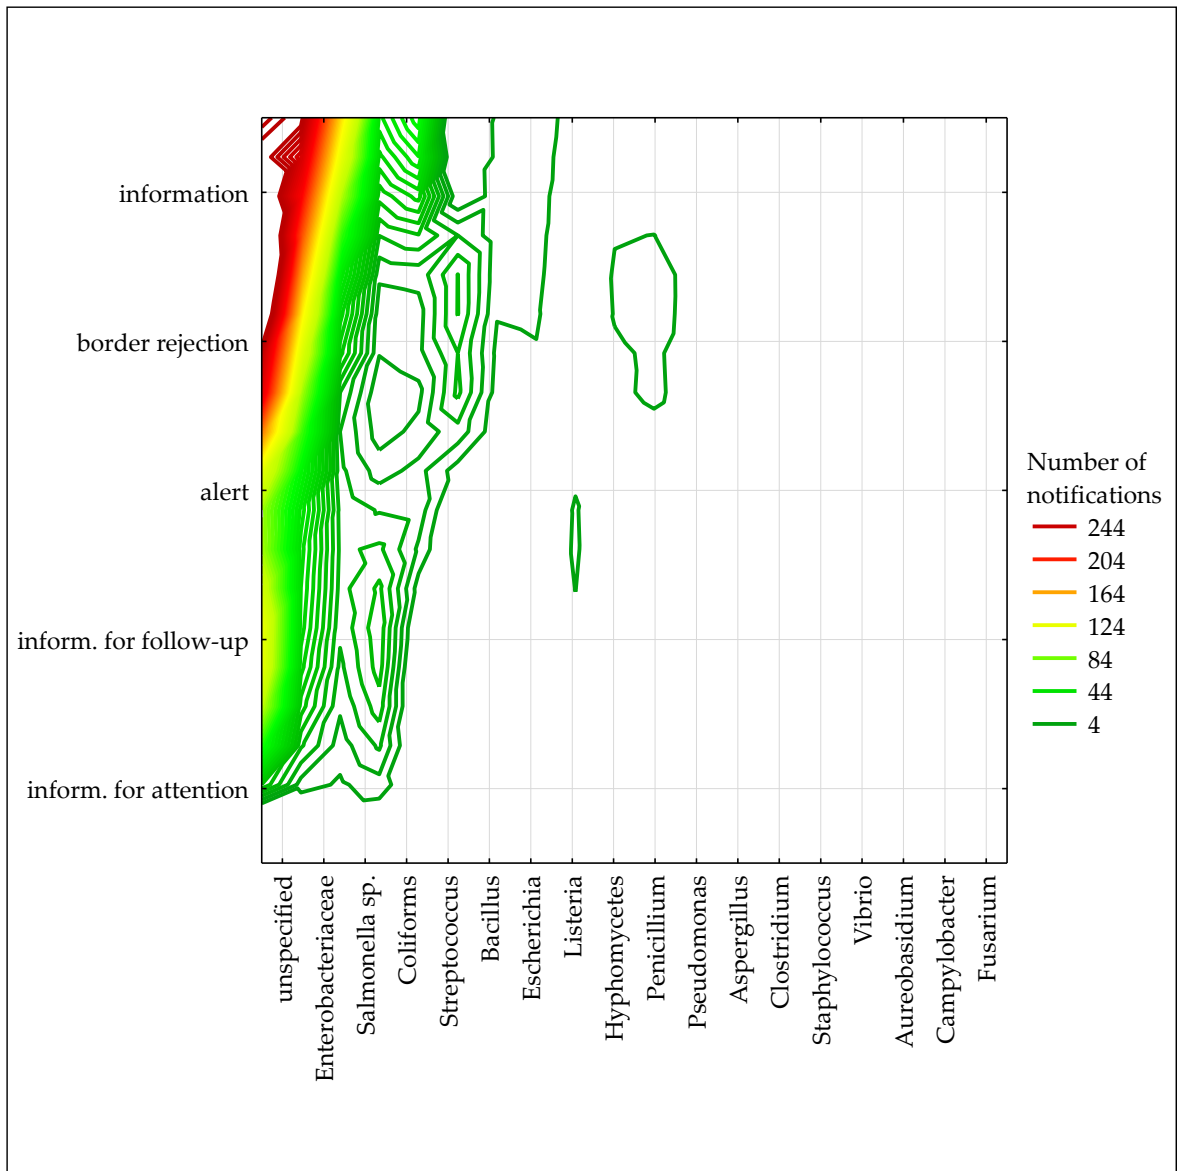

**Figure S60.** Similarities of RASFF notifications on non-pathogenic microorganisms and notification type within food using two-way joining.

inform. for attention – information for attention  
 inform. for follow-up – information for follow-up

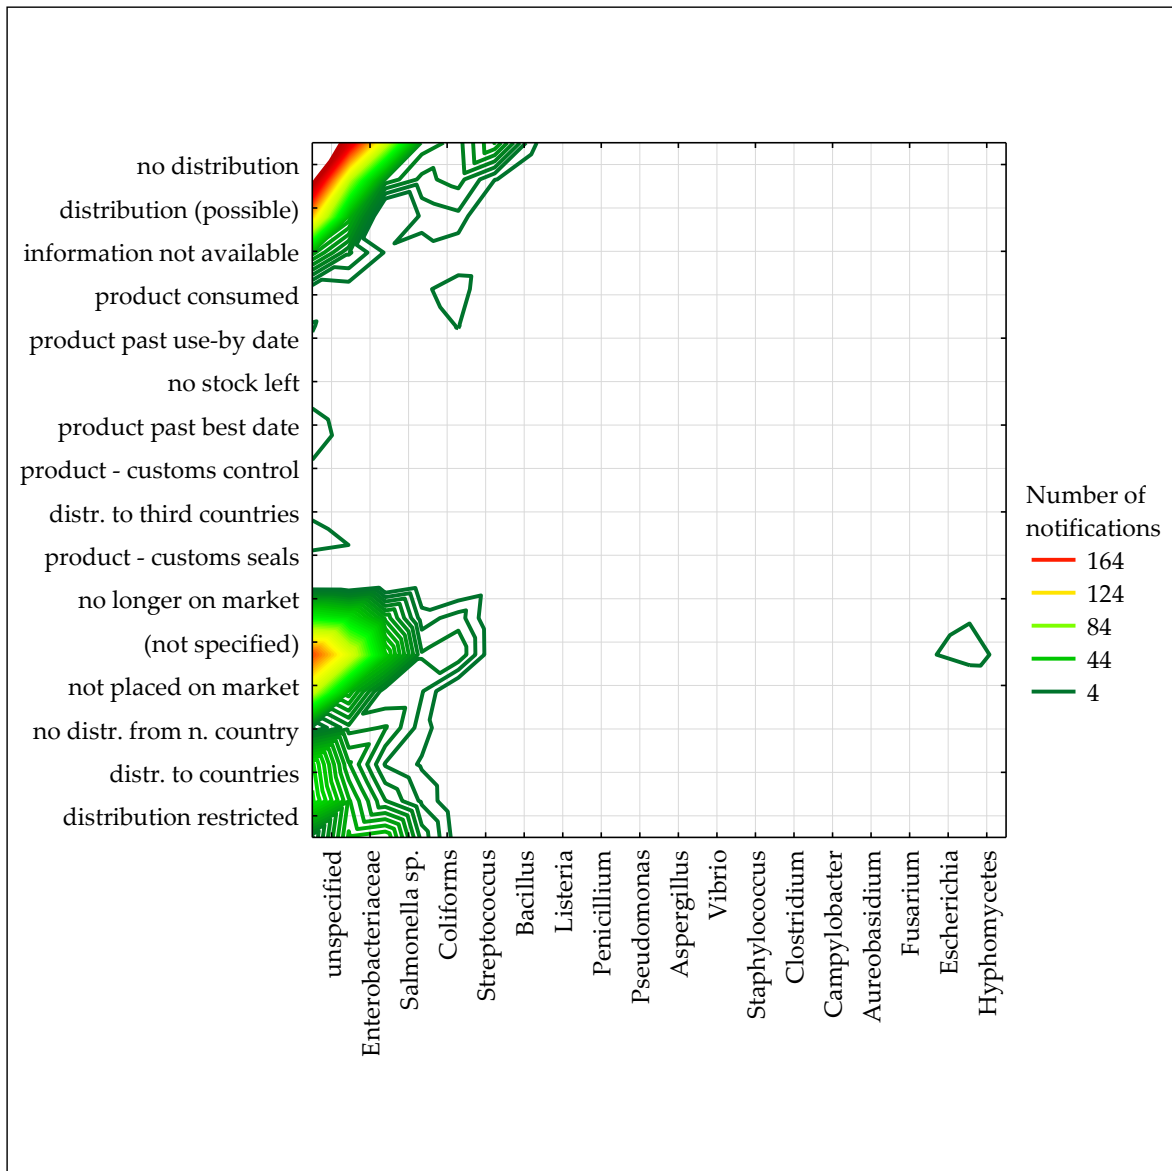

**Figure S61.** Similarities of RASFF notifications on non-pathogenic microorganisms and distribution status within food using two-way joining.

distr. to countries – distribution to other member countries

distr. to third countries – distribution to third countries

distribution (possible) – distribution on the market (possible)

distribution restricted – distribution restricted to notifying country

information not available – information on distribution not (yet) available

no distr. from n. country – no distribution from notifying country

no longer on market – product (presumably) no longer on the market

not placed on market – product not (yet) placed on the market

product - customs control – product under customs control

product - customs seals – product allowed to travel to destination under customs seals

product consumed – product already consumed

product past best date – product past best before date

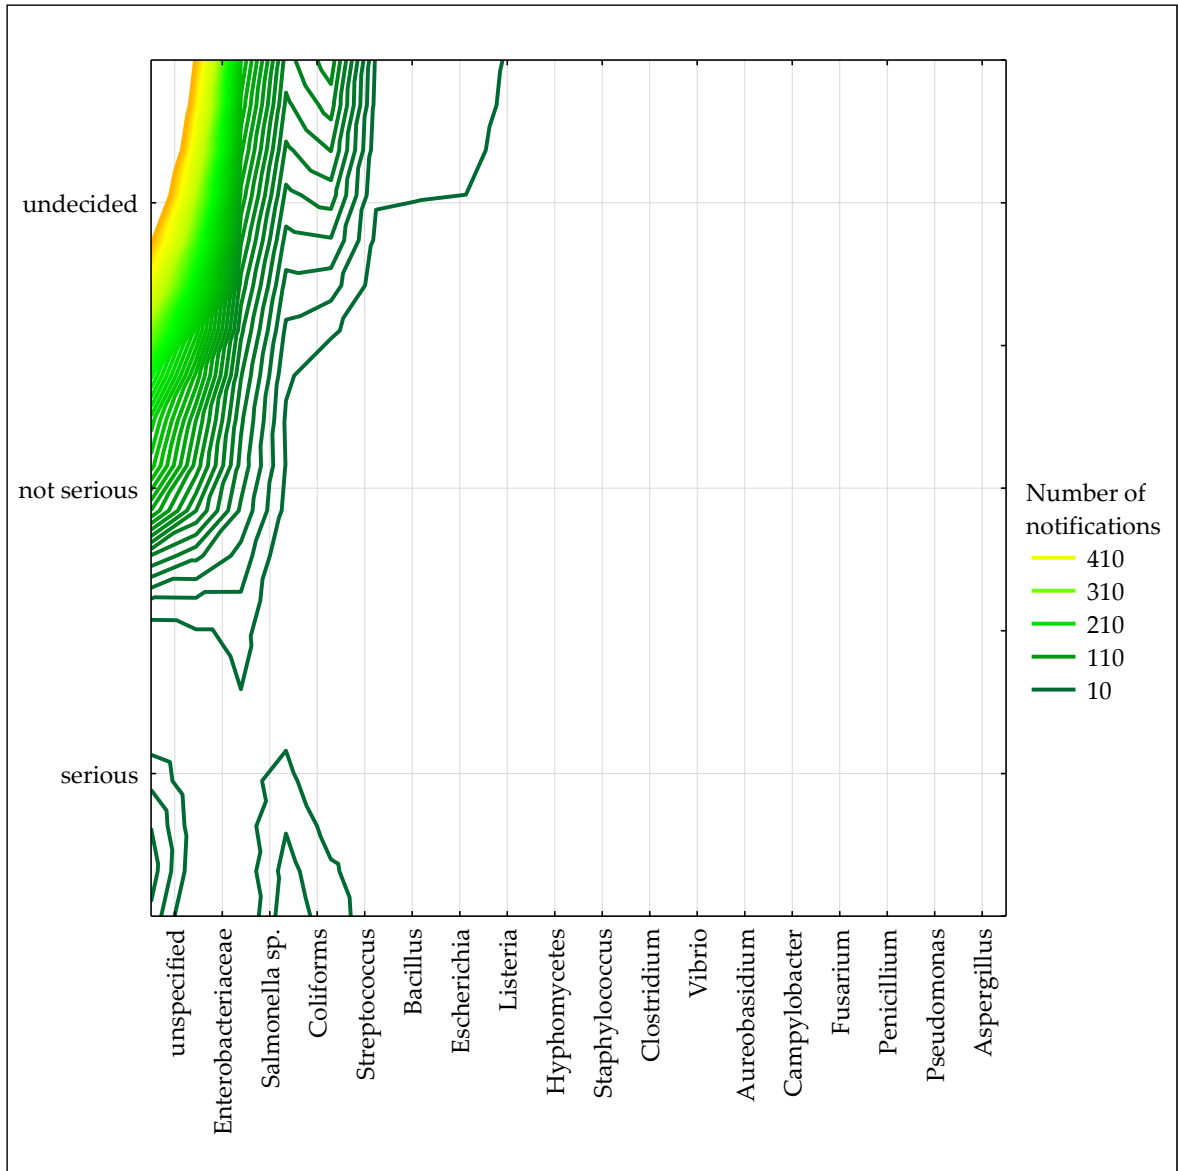

**Figure S62.** Similarities of RASFF notifications on non-pathogenic microorganisms and risk decision within food using two-way joining.

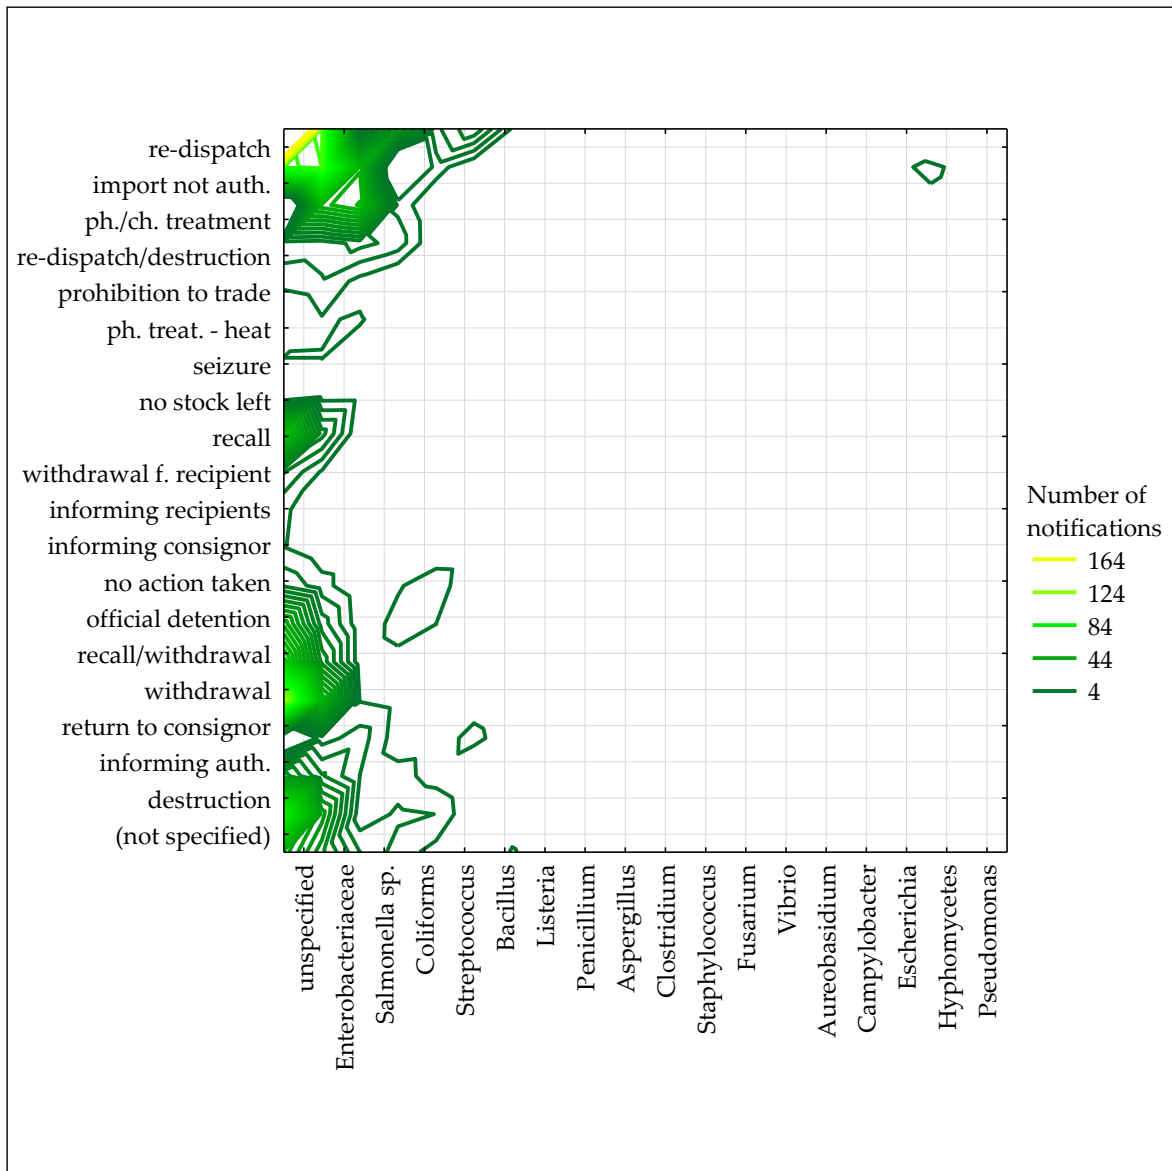

**Figure S63.** Similarities of RASFF notifications on non-pathogenic microorganisms and action taken within food using two-way joining.

import not auth. – import not authorised  
informing auth. – informing authorities  
ph. treat. - heat – physical treatment - heat treatment  
ph./ch. treatment – physical/chemical treatment  
prohibition to trade – prohibition to trade - sales ban  
recall – recall from consumers  
recall/withdrawal – product recall or withdrawal  
re-dispatch/destruction – re-dispatch or destruction  
withdrawal f. recipient – withdrawal from recipient(s)  
withdrawal – withdrawal from the market

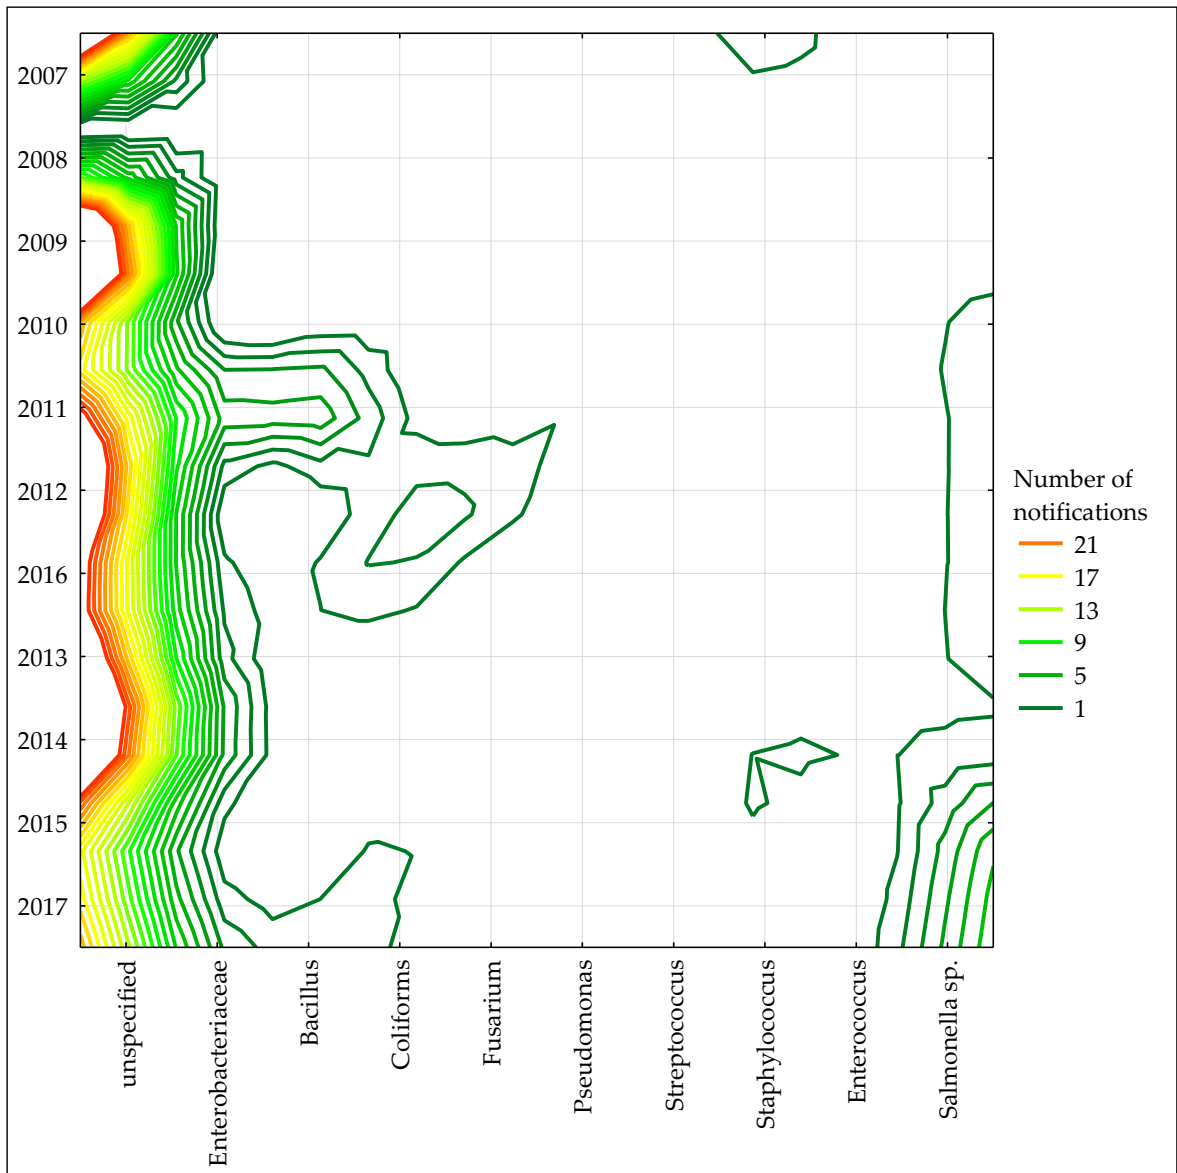

**Figure S64.** Similarities of RASFF notifications on non-pathogenic microorganisms and year within feed using two-way joining.



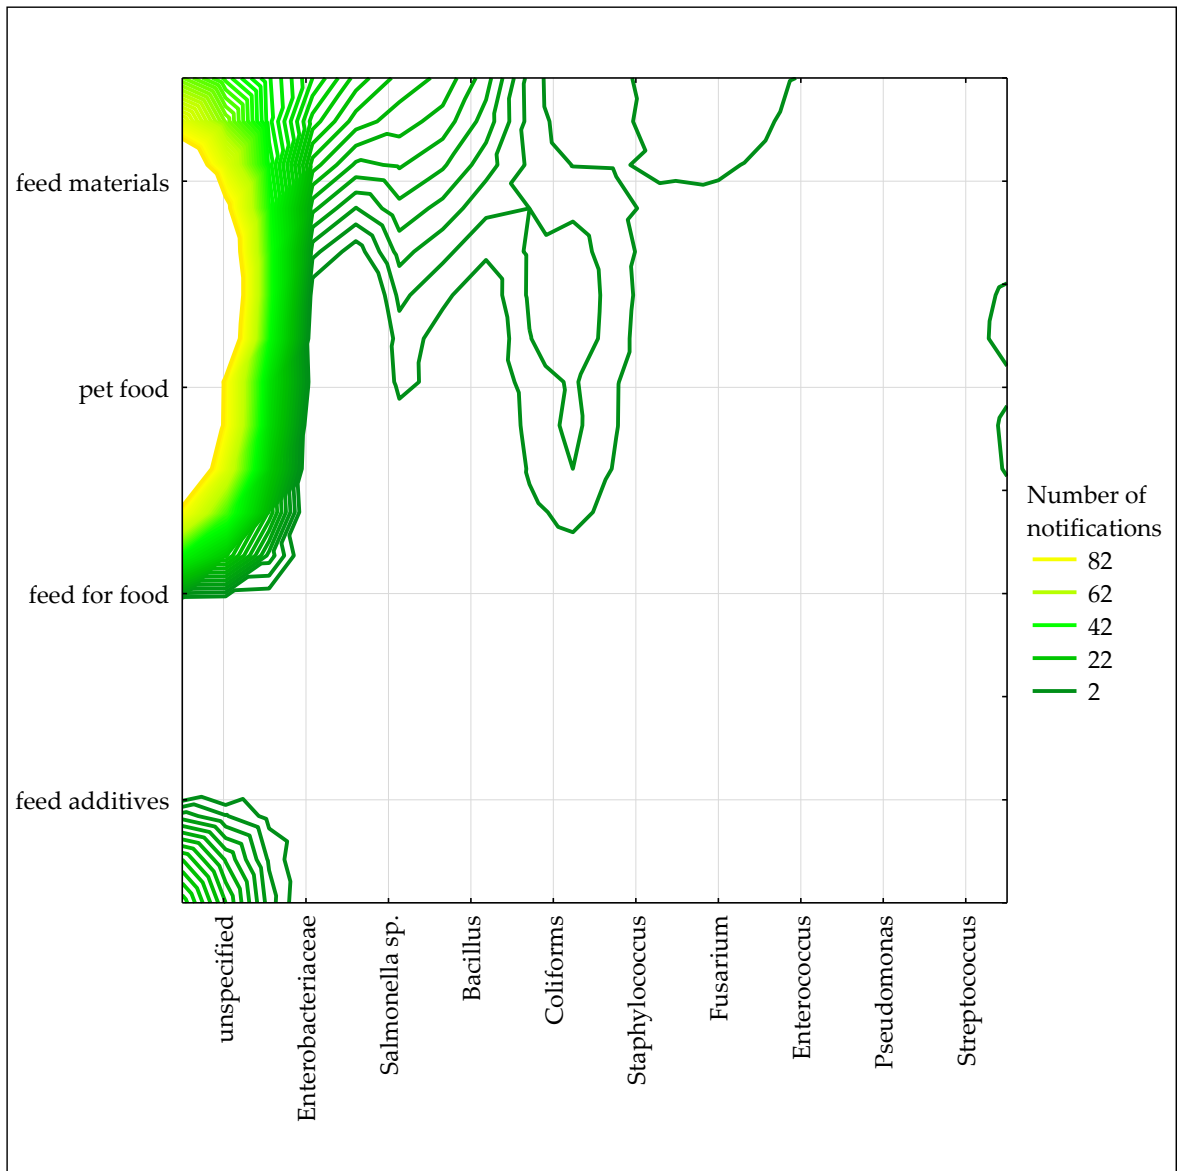

**Figure S65.** Similarities of RASFF notifications on non-pathogenic microorganisms and product category within feed using two-way joining.

feed for food – feed for food-producing animals - (obsolete)

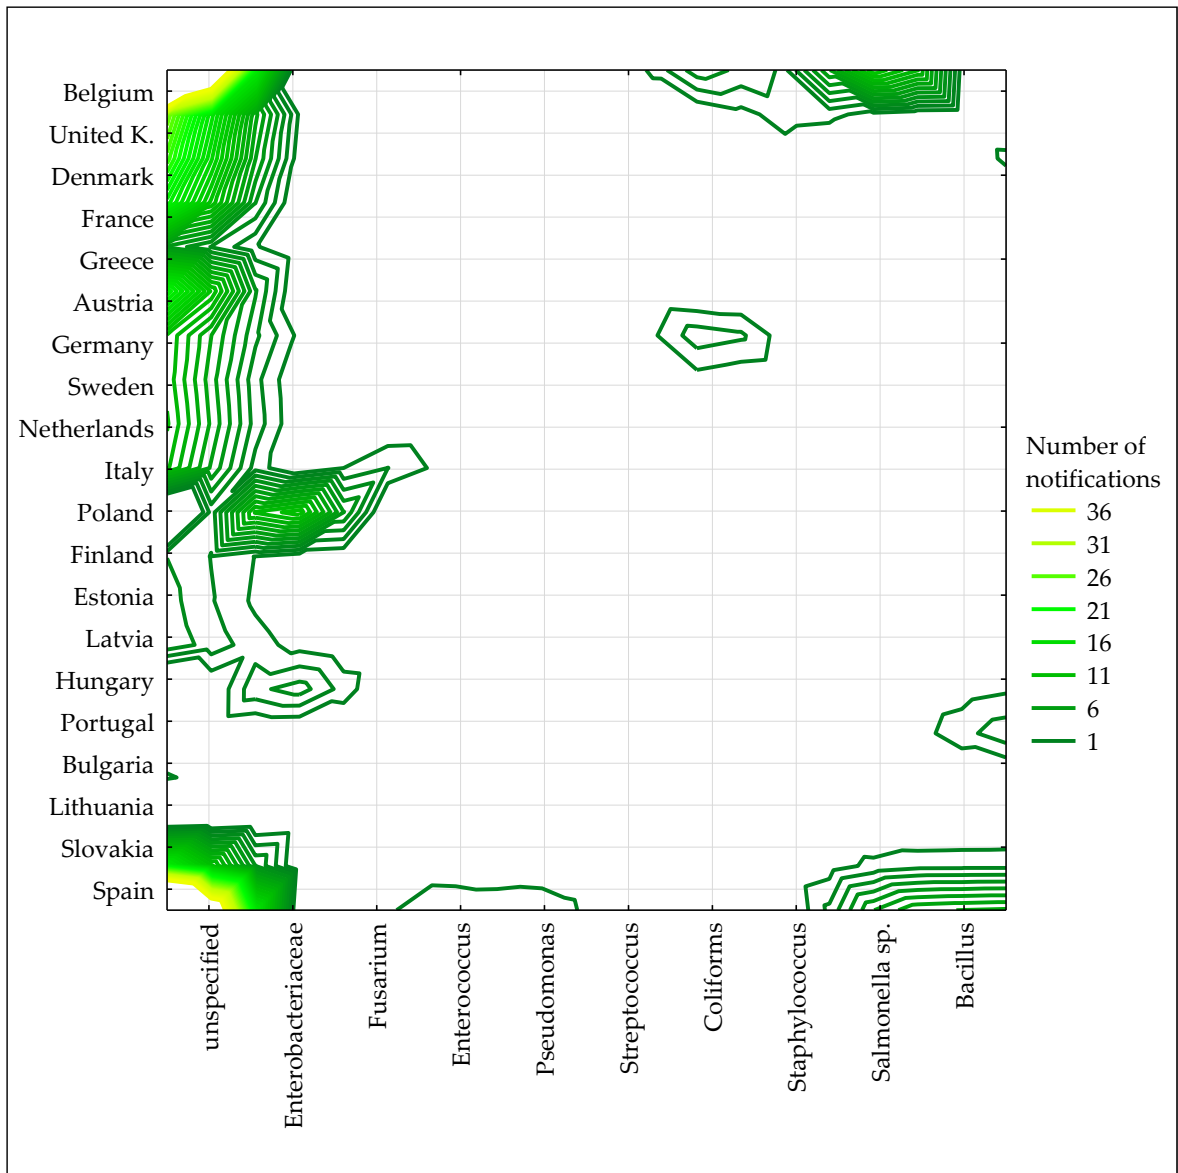

**Figure S66.** Similarities of RASFF notifications on non-pathogenic microorganisms and notifying country within feed using two-way joining.

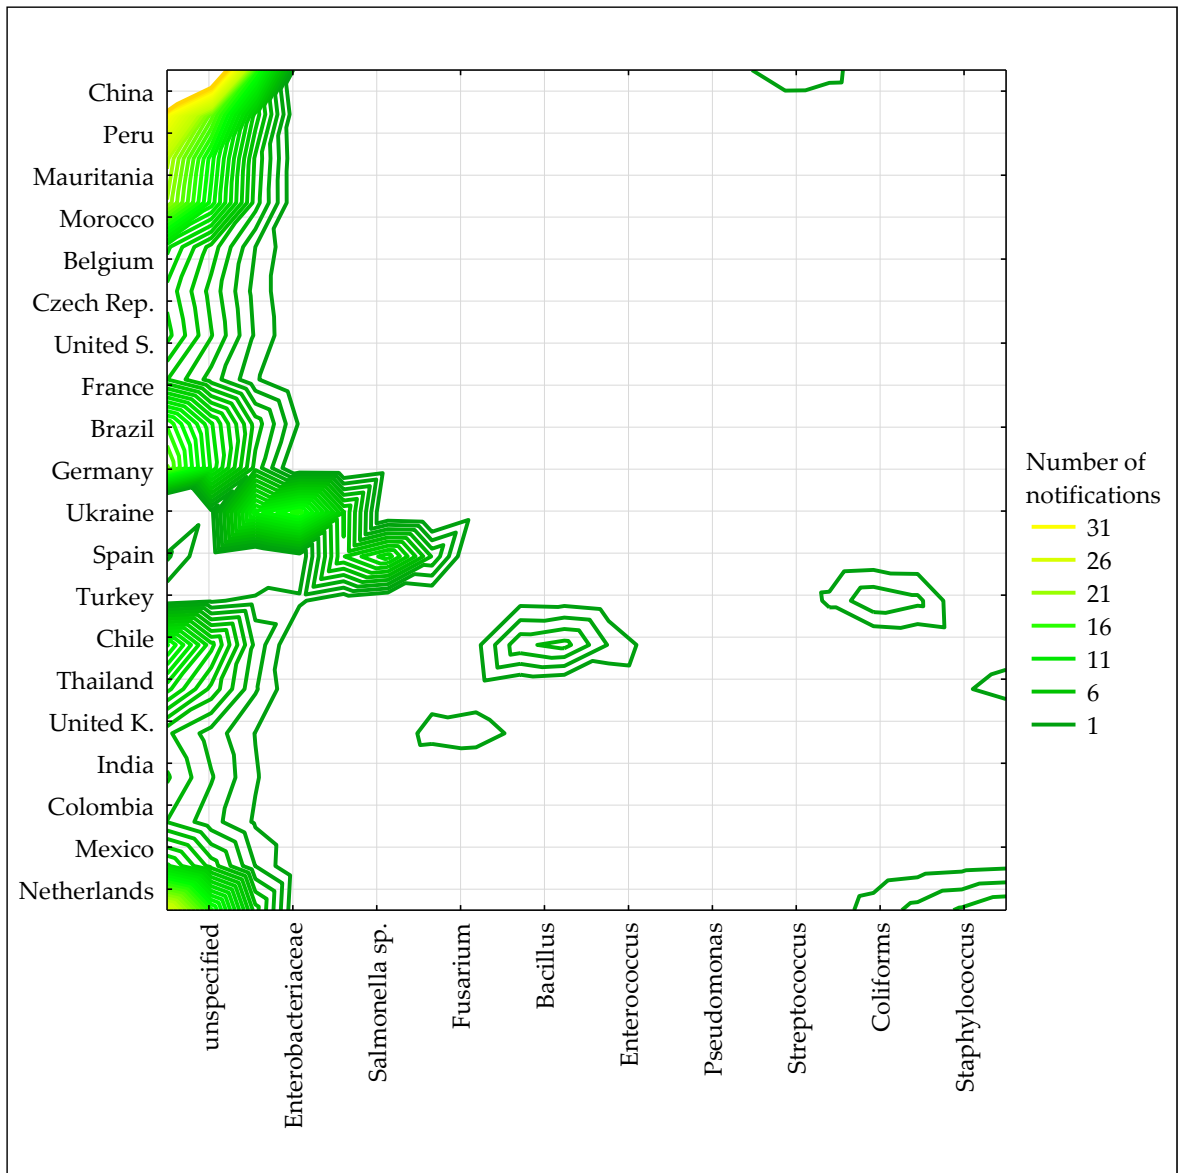

**Figure S67.** Similarities of RASFF notifications on non-pathogenic microorganisms and origin country within feed using two-way joining.

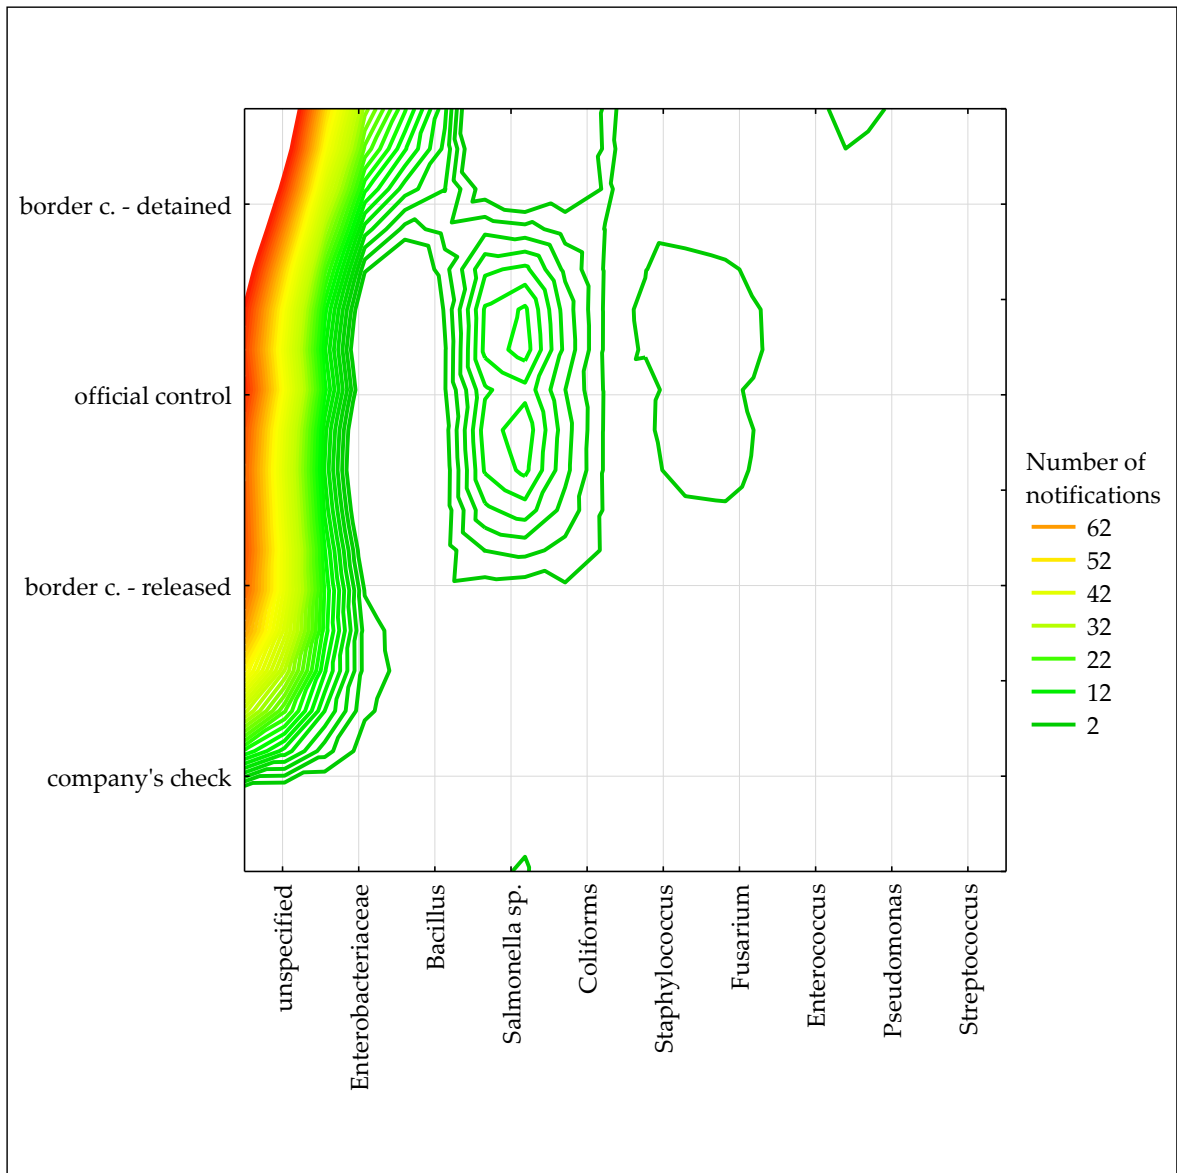

**Figure S68.** Similarities of RASFF notifications on non-pathogenic microorganisms and notification basis within feed using two-way joining.

border c. - detained – border control - consignment detained

border c. - released – border control - consignment released

company's check – company's own check

official control – official control on the market

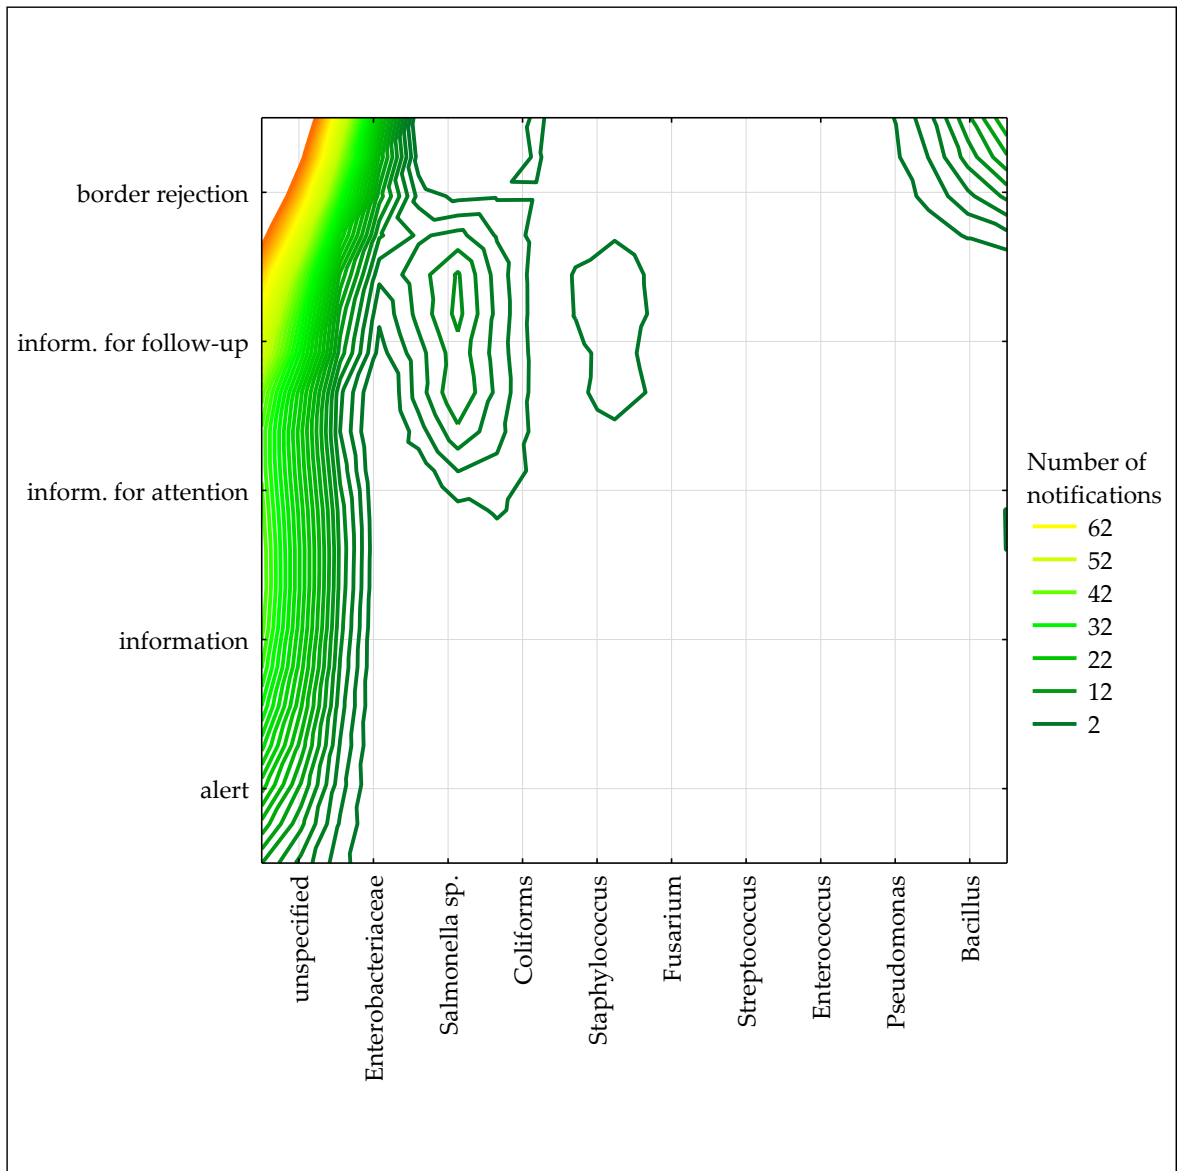

**Figure S69.** Similarities of RASFF notifications on non-pathogenic microorganisms and notification type within feed using two-way joining.

inform. for attention – information for attention  
 inform. for follow-up – information for follow-up

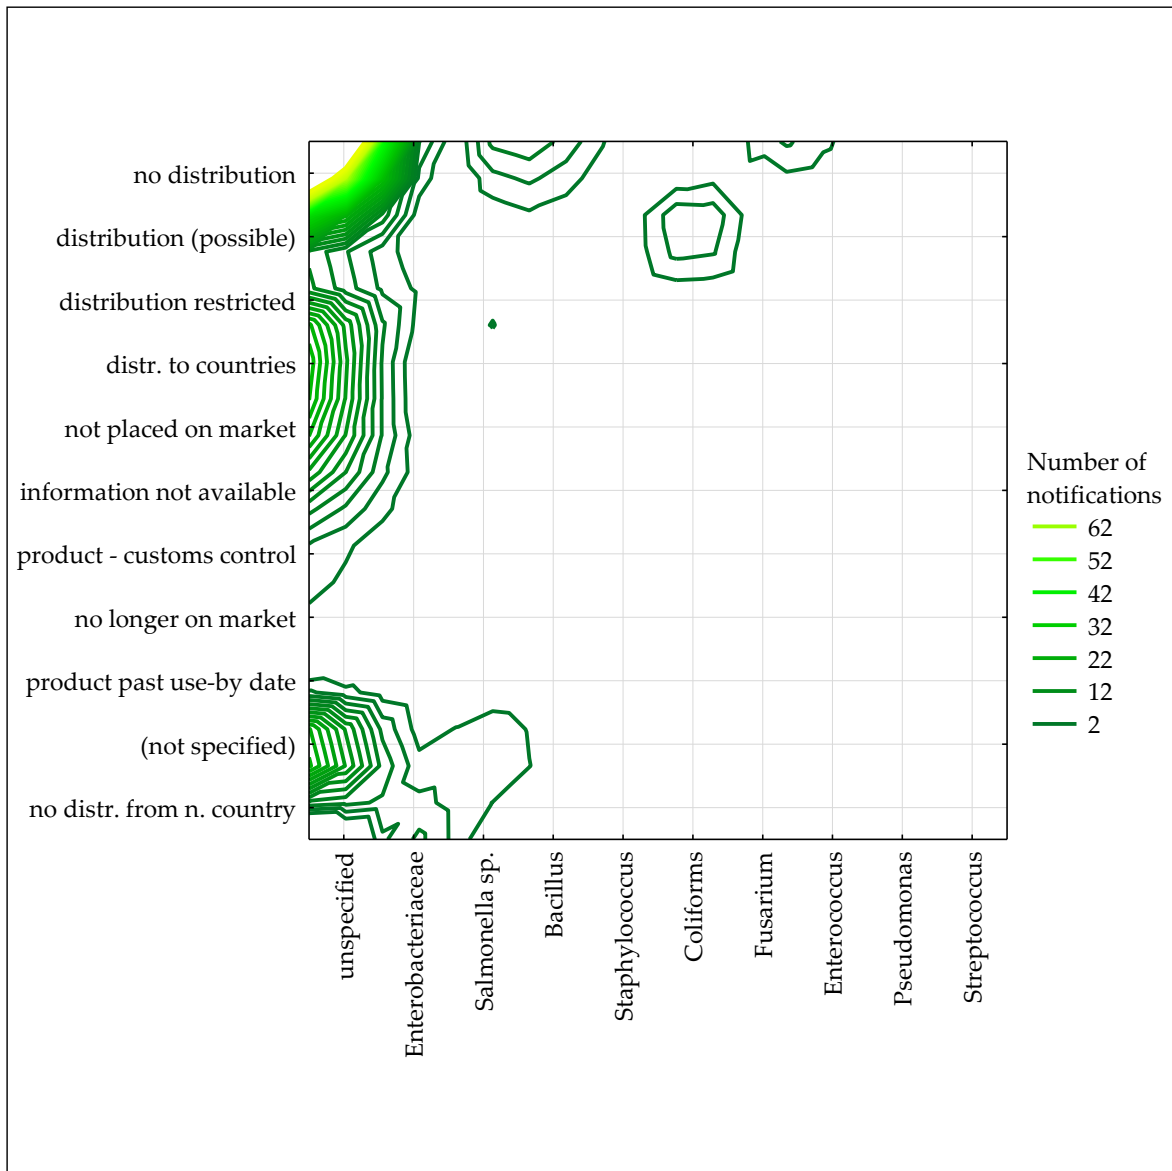

**Figure S70.** Similarities of RASFF notifications on non-pathogenic microorganisms and distribution status within feed using two-way joining.

distr. to countries – distribution to other member countries  
distribution (possible) – distribution on the market (possible)  
distribution restricted – distribution restricted to notifying country  
information not available – information on distribution not (yet) available  
no distr. from n. country – no distribution from notifying country  
no longer on market – product (presumably) no longer on the market  
not placed on market – product not (yet) placed on the market  
product - customs control – product under customs control

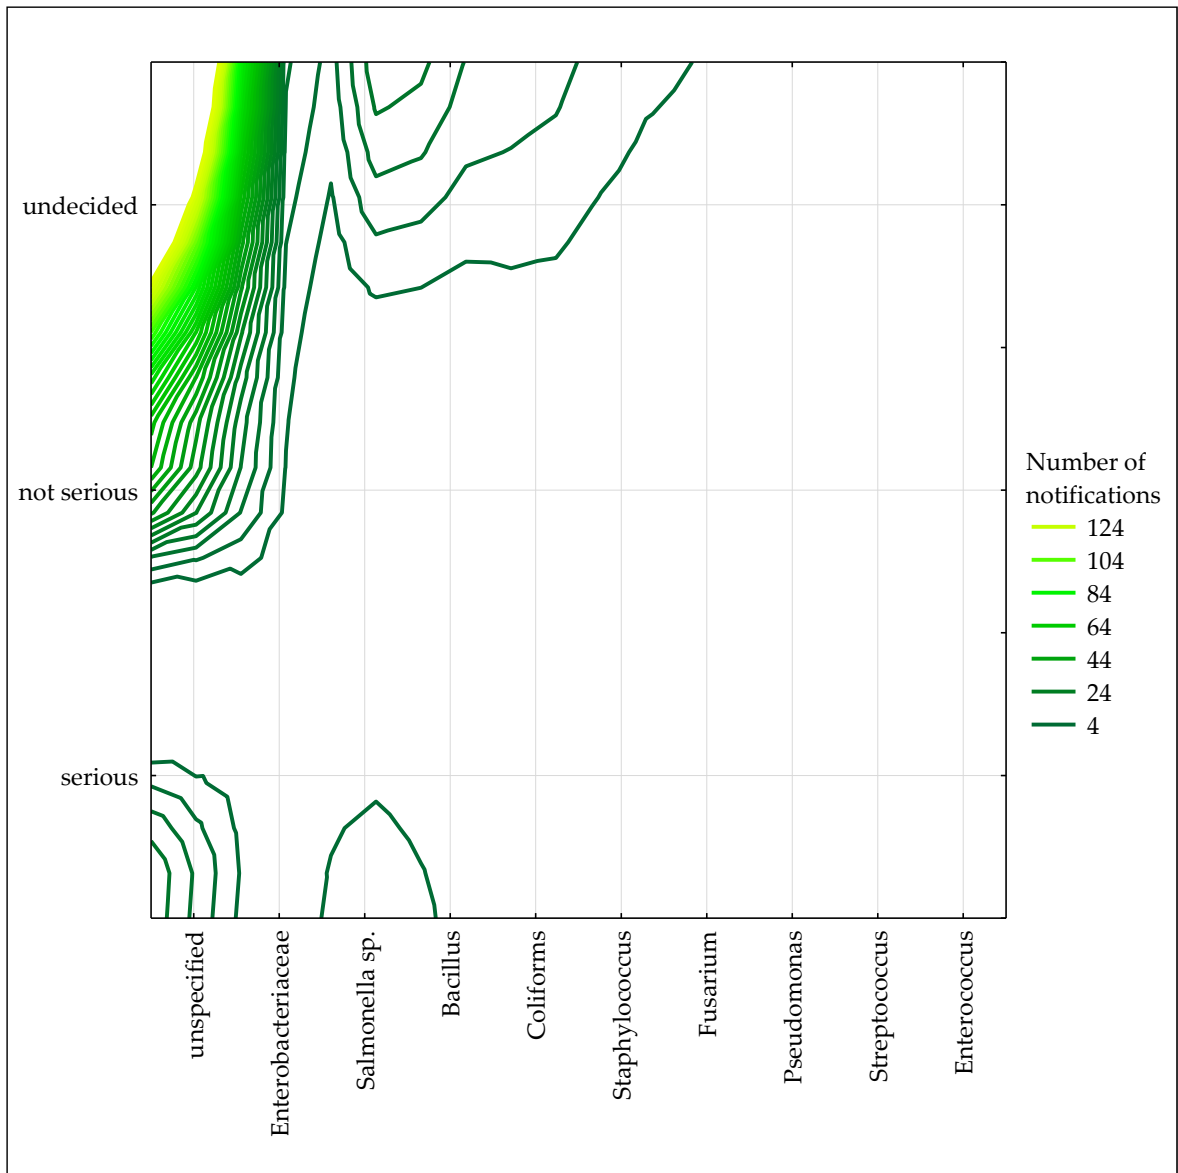

**Figure S71.** Similarities of RASFF notifications on non-pathogenic microorganisms and risk decision within feed using two-way joining.

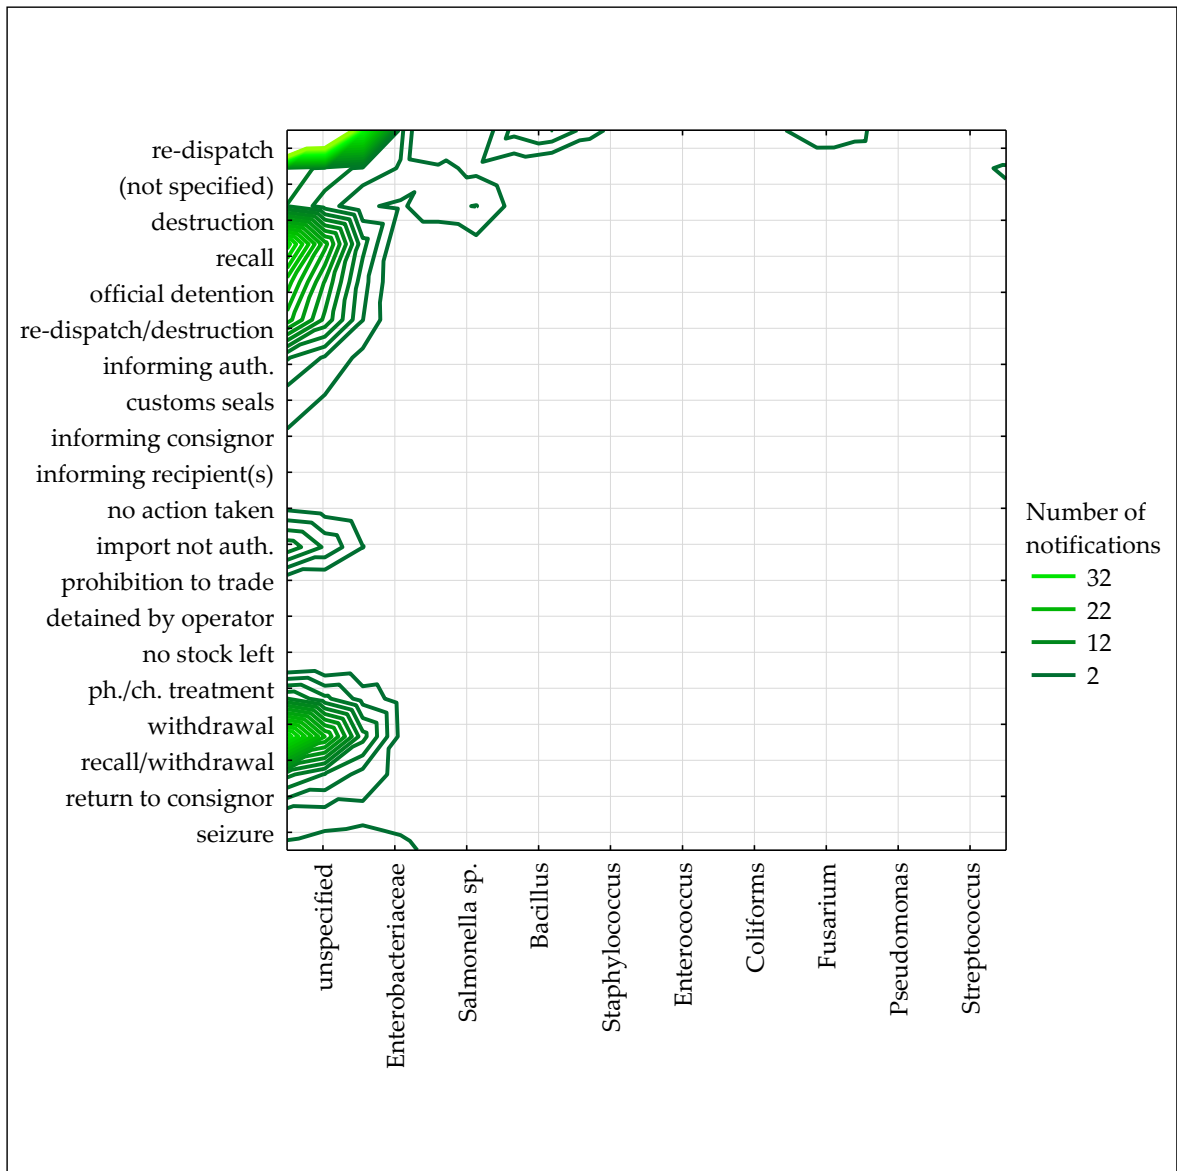

**Figure S72.** Similarities of RASFF notifications on non-pathogenic microorganisms and action taken within feed using two-way joining.

- customs seals – placed under customs seals
- import not auth. – import not authorised
- informing auth. – informing authorities
- ph./ch. treatment – physical/chemical treatment
- prohibition to trade – prohibition to trade - sales ban
- recall – recall from consumers
- recall/withdrawal – product recall or withdrawal
- re-dispatch/destruction – re-dispatch or destruction
- withdrawal – withdrawal from the market
